# Supplementary material for: 3,6’-dithiopomalidomide reduces neural loss, inflammation, behavioral deficits in brain injury and microglial activation
Source: eLife. 2020 Jun 26;9:e54726. doi: 10.7554/eLife.54726 (PMC7375814; doi:10.7554/eLife.54726)
Supplement: Figure 1—source data 1. [file elife-54726-fig1-data1.xlsx]

## Sheet: Fig 1 B and C
	Figure 1 B			Figure 1 B			Figure 1 B			Figure 1 C	Mouse weights (g)
											Day # from start of dosing
	Rat plasma TNF-alpha			Rat cortical TNF-alpha			Rat hippocampal TNF-alpha			Vehicle
		(pg/ml)			(pg/ µg)					Day #	Day #	Day #	Day #
	CMC + Saline	5.32304		CMC + Saline	0.541331		CMC + Saline	0.367022		0	7	14	21
		6.23861			0.563654			0.803237		22	22	23	27
		6.73218			0.610204			0.42424		21	22	24	25
		6.61272								21	22	24	28
		9.1744		CMC + LPS	8.6649		CMC + LPS	5.62039		22	21	25	23
		7.33546			5.75324			8.08638		27	27	28	28
		6.74892			7.45668			5.47963		21	24	24	28
										21	23	26	25
	CMC + LPS	883.609		POM + LPS	3.45743		POM + LPS	3.56166		20	22	25	26
		668.553			3.23748			3.43042
		857.566			3.38997			3.02893		POM
		619.867						2.75325		Day #	Day #	Day #	Day #
		876.295								0	7	14	21
		848.628		3,6'dt-POM + LPS	3.45743		3,6'dt-POM + LPS	2.50136		19	20	26	23
		871.027			4.85018			2.43192		24	24	25	27
					3.23748			3.66212		22	23	26	25
	POM + LPS	303.225			3.38997			4.04896		24	24	26	28
		391.212								26	27	25	25
		341.929
		341.212								3,6'-dt-POM
										Day #	Day #	Day #	Day #
	3,6'dt-POM + LPS	402.868								0	7	14	21
		318.65								23	23	23	25
		535.25								23	23	25	25
		387.839								21	21	24	23
										24	23	25	24
										27	29	30	31
