# Supplementary material for: 3,6’-dithiopomalidomide reduces neural loss, inflammation, behavioral deficits in brain injury and microglial activation
Source: eLife. 2020 Jun 26;9:e54726. doi: 10.7554/eLife.54726 (PMC7375814; doi:10.7554/eLife.54726)
Supplement: Figure 2—source data 2. [file elife-54726-fig2-data2.xlsx]

## Sheet: 工作表1
	Name	count	total area (pixel)	average size	%area	mean		contusion volume	contusion volume(%)
R	137)sh24-6.png	28	33052	1180.43	40.015	201.345		0.00293477	0.293477			5hr	N	Missing	Mean	Std Dev	SEM
L	137)sh24-6.png	14	32955	2353.93	37.716	200.747						Sham	4	0	0.231	0.0949	0.0475
R	138)sh24-7.png	23	32619	1418.22	36.853	162.822		0.00309635	0.309635			TBI + V	5	0	19.651	1.022	0.457
L	138)sh24-7.png	13	32518	2501.39	44.156	190.496						T + DP(5hr)	4	0	7.378	1.731	0.865
R	139)sh24-8.png	9	34546	3838.44	44.818	190.013		0.00101314	0.101314
L	139)sh24-8.png	12	34511	2875.92	34.637	196.802
R	140)sh24-9.png	32	35077	1096.16	55.004	197.145		0.00219517	0.219517
L	140)sh24-9.png	20	35000	1750	35.402	201.637						7hr	N	Missing	Mean	Std Dev	SEM
R	19)T24ve5h-6.png	26	46266	1779.46	50.224	224.23		0.188065	18.8065			Sham	4	0	0.231	0.0949	0.0475
L	19)T24ve5h-6.png	51	37565	736.569	36.626	190.554						TBI + V	5	0	19.651	1.022	0.457
R	24)T24ve5h-7.png	19	42188	2220.42	43.187	232.246		0.208282	20.8282			T + DP(7hr)	3	0	17.662	1.21	0.698
L	24)T24ve5h-7.png	98	33401	340.827	28.668	195.568
R	25)T24ve5h-8.png	12	42004	3500.33	49.461	217.144		0.203124	20.3124
L	25)T24ve5h-8.png	116	33472	288.552	33.904	191.192
R	132)T24ve5h-12.png	22	37714	1714.27	50.41	213.022		0.183964	18.3964
L	132)T24ve5h-12.png	35	30776	879.314	32.519	177.816
R	133)T24ve5h-13.jpg	15	40750	2716.67	45.144	211.018		0.199141	19.9141
L	133)T24ve5h-13.jpg	69	32635	472.971	36.286	197.172
R	136)T24ve5h-16.png	12	40688	3390.67	44.272	198.013		0.158302	15.8302
L	136)T24ve5h-16.png	47	34247	728.66	36.853	158.93
R	195)T24DP7h5-1.png	18	18124	1006.89	59.419	225.332		0.187707	18.7707
L	195)T24DP7h5-1.png	36	14722	408.944	51.278	218.252
R	196)T24DP7h5-2.png	13	16327	1255.92	62.155	222.751		0.163717	16.3717
L	196)T24DP7h5-2.png	17	13654	803.176	49.759	214.825
R	197)T24DP7h5-3.png	10	12823	1282.3	57.751	222.793		0.178429	17.8429
L	197)T24DP7h5-3.png	27	10535	390.185	47.869	222.653
