# Supplementary material for: 3,6’-dithiopomalidomide reduces neural loss, inflammation, behavioral deficits in brain injury and microglial activation
Source: eLife. 2020 Jun 26;9:e54726. doi: 10.7554/eLife.54726 (PMC7375814; doi:10.7554/eLife.54726)
Supplement: Figure 2—source data 3. [file elife-54726-fig2-data3.xlsx]

## Sheet: Behavior
	Group	group_name	sex	S_1(sec)	S_2(sec)	S_3(sec)	S_4(sec)	S_5(sec)	S average (L,M)_preTBI (sec)	S_1(sec)	S_2(sec)	S_3(sec)	S_4(sec)	S_5(sec)	S average (R, M)_preTBI (sec)	S_1(sec)	S_2(sec)	S_3(sec)	S_4(sec)	S_5(sec)	S average Post TBI (L,Mean)	S_1	S_2	S_3	S_4	S_5	S averagePost TBI (R,Mean)(sec)	Sw_LpreT	Sw_RpreT	Rightpre_%	Sw_LpostT	Sw_RpostT	Right_%	mNSS_preT	mNSS_postT	B_1(sec)	B_2(sec)	B_3(sec)	B_4(sec)	B_5(sec)	average B_preT(sec)	B_1P	B_2P	B_3P	B_4P	B_5P	average B_postT	Degree_1	Degree_2
131	T24h	T24Ve5h-11	M	8	8	4	5	9	6.8	9	5	3	1	12	6	4	43	24	10	4	17	17	180	180	180	180	147.4	15	5	25	5	15	75	0	5	7	6	8	8	8	7.4	60	60	60	60	60	60
132	T24h	T24Ve5h-12	M	17	14	13	5	8	11.4	14	13	11	6	13	11.4	180	7	6	13	6	42.4	180	180	180	180	180	180	7	13	65	8	12	60	0	12	7	7	5	7	6	6.4	60	60	60	60	60	60
133	T24h	T24Ve5h-13	M	6	8	5	4	5	5.6	3	9	3	3	3	4.2	180	180	135	13	17	105	180	180	179	180	32	150.2	9	11	55	0	20	100	0	6	9	10	9	11	9	9.6	60	60	60	60	60	60
134	T24h	T24Ve5h-14	M	9	9	1	16	11	9.2	7	5	5	2	7	5.2	6	10	2	6	16	8	12	3	5	9	19	9.6	16	4	20	2	18	90	0	4	4	10	5	7	10	7.2	9	7	9	9	14	9.6
135	T24h	T24Ve5h-15	M	19	5	8	14	4	10	15	11	12	18	14	14	10	180	30	35	6	52.2	180	180	180	180	180	180	7	13	65	0	20	100	0	7	9	10	10	9	6	8.8	60	60	60	60	60	60
136	T24h	T24Ve5h-16	M	10	5	7	2	9	6.6	7	4	5	5	7	5.6	12	6	10	21	5	10.8	180	180	140	140	180	164	12	8	40	13	7	35	0	9	11	10	4	6	5	7.2	60	60	60	60	60	60
137	sham	sh24-6	M	8	8	7	12	8	8.6	11	10	4	10	3	7.6	60	4	18	1	4	17.4	20	7	22	4	1	10.8	10	10	50	10	10	50	0	0	4	5	4	8	4	5	4	7	7	10	4	6.4
138	sham	sh24-7	M	9	5	3	3	8	5.6	11	7	5	6	4	6.6	16	5	10	3	8	8.4	17	8	7	5	10	9.4	8	12	60	10	10	50	0	0	13	5	9	10	8	9	4	4	4	4	3	3.8
139	sham	sh24-8	M	9	6	3	6	4	5.6	8	7	2	3	3	4.6	36	4	5	9	18	14.4	38	5	6	8	23	16	14	6	30	12	8	40	0	0	4	6	5	4	5	4.8	13	18	13	13	10	13.4
140	sham	sh24-9	M	X	X	X	X	X	X	X	X	X	X	X	X	10	8	11	12	16	11.4	12	12	10	11	17	12.4	X	X	X	10	10	50	0	1	X	X	X	X	X	X	9	11	11	11	9	10.2
141	T24h	T24DP5h-1	M	20	4	4	14	20	12.4	17	7	6	13	7	10	15	35	33	33	49	33	180	148	180	180	158	169.2	6	14	70	5	15	75	0	4	10	13	10	12	9	10.8	60	60	60	60	60	60
142	T24h	T24DP5h-2	M	22	18	6	10	17	14.6	16	13	29	20	18	19.2	16	44	35	48	50	38.6	180	180	180	180	180	180	11	9	45	7	13	65	0	5	7	9	7	8	10	8.2	60	60	60	60	60	60
143	T24h	T24DP5h-3	M	7	14	5	29	13	13.6	7	17	13	9	14	12	4	7	6	3	4	4.8	5	4	3	13	6	6.2	13	7	35	6	14	70	0	2	8	8	5	7	7	7	60	60	60	60	60	60
144	T24h	T24DP5h-4	M	4	17	11	6	8	9.2	9	13	15	7	14	11.6	7	8	3	8	3	5.8	50	180	180	180	90	136	11	9	45	3	17	85	0	3	15	19	18	18	16	17.2	60	60	60	60	60	60
145	T24h	T24DP5h-5	M	30	7	10	3	17	13.4	21	10	24	4	20	15.8	20	50	180	180	43	94.6	21	24	8	14	45	22.4	10	10	50	4	16	80	0	3	5	9	9	8	5	7.2	60	60	60	60	60	60
146	sham	sh24DP5h-1	M	11	15	8	16	15	13	17	24	5	18	7	14.2	4	13	12	10	9	9.6	10	12	11	8	16	11.4	6	14	70	12	8	40	0	0	20	24	11	22	13	18	10	7	9	5	5	7.2
147	sham	sh24DP5h-2	M	6	16	8	4	9	8.6	4	7	3	25	6	9	6	3	10	10	3	6.4	10	6	3	4	10	6.6	9	11	55	8	12	60	0	0	5	4	5	10	9	6.6	4	5	4	5	4	4.4
148	sham	sh24DP5h-3	M	16	20	30	8	6	16	3	30	11	12	13	13.8	6	4	4	7	10	6.2	10	8	9	4	2	6.6	13	7	35	11	9	45	0	1	7	6	17	20	15	13	4	6	15	10	9	8.8
149	sham	sh24DP5h-4	M	18	13	10	7	4	10.4	26	10	9	4	7	11.2	4	11	20	11	3	9.8	6	10	9	12	5	8.4	16	4	20	11	9	45	0	0	10	10	4	5	5	6.8	5	7	5	6	4	5.4
150	sham	sh24DP5h-5	M	4	10	7	16	16	10.6	3	3	15	15	4	8	14	6	14	9	12	11	11	10	12	16	13	12.4	12	8	40	12	8	40	0	0	9	14	16	17	20	15.2	12	10	7	6	9	8.8
151	sham	sh24-10	M	7	3	4	10	3	5.4	9	5	7	24	21	13.2	4	17	7	5	36	13.8	12	13	15	12		13	8	12	60	5	15	75	0	0	10	12	8	7	12	9.8	14	20	13	22	17	17.2	60
152	sham	sh24-11	M	11	22	5	29	15	16.4	15	25	12	8	25	17	7	22	60	50		34.75	23	40	35	40		34.5	11	9	45	12	8	40	0	0	13	9	9	6	7	8.8	6	6	4	6	4	5.2	50
153	sham	sh24-12	M	15	11	20	2		12	2	24	21	7		13.5	146	130	180	63	36	111	159	122	60	30	166	107.4	12	8	40	10	10	50	0	0	9	6	7	9	10	8.2	8	12	8	6	8	8.4	50	55
154	sham	sh24-13	M	13	6	16	16	14	13	24	32	5	17	2	16	14	7	9	15	5	10	5	3	13	5	2	5.6	7	13	65	5	15	75	0	0	8	10	4	6	8	7.2	40	27	35			34
155	sham	sh24-14	M	12	9	12	13		11.5	10	5	17	30		15.5	14	27	8	16		16.25	11	7	5	13	17	10.6	7	13	65	8	12	60	0	0	6	8	10	9	6	7.8	5	8	4	5	4	5.2	55	55
156	sham	sh24P5h5-8	M	11	1	6	8	14	8	12	5	11	10	16	10.8	7	6	4	4	3	4.8	15	7	6	8	10	9.2	8	12	60	9	11	55	0	0	9	5	7	8	7	7.2	6	6	7	5	6	6	45	50
157	sham	sh24P5h5-9	M	21	10	3	3	1	7.6	29	22	13	9	20	18.6	3	6	8	3	6	5.2	4	2	14	2	2	4.8	26	4	13.3333	24	6	20	0	0	16	20	19	24		19.75	26	28	36			30	45	50
158	sham	sh24P5h5-10	M	16	22	16	13		16.75	19	25	13	14		17.75	20	13	11	18	18	16	25	22	22	15	28	22.4	20	10	33.3333	12	8	40	0	0	14	12	20	18		16	25	29	28			27.3333	55	55
159	sham	sh24P5h5-11	M	34	26	34	14	15	24.6	45	43	24	25	7	28.8	28	14	6	5	21	14.8	6	6	30	10	33	17	10	10	50	7	13	65	0	0	12	13	12	15		13	13	12	14	18	15	14.4	60	60
160	sham	sh24P5h5-12	M	10	19	19	12		15	11	17	19	15		15.5	13	20	5	6	11	11	18	21	16	8	6	13.8	8	12	60	11	9	45	0	0	10	12	13	11		11.5	8	11	13	13	10	11	60	55
161	sham	sh24DP5h1-1	M	26	7	4	25		15.5	24	11	5	24		16	15	5	3	3	3	5.8	17	7	5	4	5	7.6	12	8	40	13	7	35	0	0	10	11	9	7	13	10	11	9	8	14	12	10.8	50	50
162	sham	sh24DP5h1-2	M	18	18	30	11		19.25	15	14	34	36		24.75	50	26				38	56	30				43	10	10	50	11	9	45	0	0	10	16	18	10		13.5	12	14	10	15	11	12.4	60	60
163	sham	sh24DP5h1-3	M	20	15	8	9		13	12	5	14	3		8.5	43	25	30			32.6667		8	10	12		10	13	7	35	13	7	35	0	0	14	12	12	11	18	13.4	8	13	15	10	14	12	55
164	sham	sh24DP5h1-4	M	14	14	16	14	9	13.4	9	2	3	10	5	5.8	20	8	20	2	5	11	12	3	15	3	4	7.4	11	9	45	9	11	55	0	0	8	5	6	8	10	7.4	10	6	8	10	9	8.6	55	60
165	sham	sh24DP5h1-5	M	18					18	22					22	65	170				117.5	76	180				128	9	11	55	11	9	45	0	0	4	4	7	5	9	5.8	6	7	8			7	50
166	sham	sh24DP5h-6	M	20	7	25	7	9	13.6	17	15	28	4	21	17	9	3	5	4	2	4.6	4	6	10	3	3	5.2	6	14	70	10	10	50	0	0	7	4	6	5	9	6.2	10	15	4	8	10	9.4	55	55
167	sham	sh24DP5h-7	M	15	24	8	19	23	17.8	22	7	6	10	17	12.4	21	15	18	4	8	13.2	20	16	17	10	3	13.2	16	4	20	9	11	55	0	0	9	7	7	8	10	8.2	9	8	15			10.6667	50	50
168	sham	sh24DP5h-8	M	15	26	60	20	39	32	42	13	30	11	14	22	5	10	8	3	8	6.8	10	17	10	7	15	11.8	11	9	45	10	10	50	0	0	15	8	10	11		11	35	40	32	30		34.25	50	50
169	sham	sh24DP5h-9	M	13	29	29	11		20.5	7	23	8	4		10.5	35	30	15	22		25.5	9	23	7	7		11.5	9	11	55	7	13	65	0	0	12	10	24	20		16.5	11	16	14	13	12	13.2	55	50
170	sham	sh24DP5h-10	M	21	21	16	7	13	15.6	18	19	9	10	9	13	4	11	9	3	19	9.2	8	18	5	15	52	19.6	9	11	55	12	8	40	0	0	7	8	10	12	9	9.2	7	8	12	11	10	9.6	55	55
171	T24h	T24Ve5h-17	M	24	16	11			17	22	10	4			12	180	180	180	180	180	180	180	180	180	180	180	180	10	20	66.6667	0	20	100	0	13	14	15				14.5	60	60	60	60	60	60	50
172	T24h	T24Ve5h-18	M	8	3	9	7	11	7.6	7	4	10	6	11	7.6	5	30	25	6	60	25.2	180	180	180	180	180	180	10	10	50	0	20	100	0	14						#DIV/0!	60	60	60	60	60	60	65
173	T24h	T24Ve5h-19	M	7	15	7	20	15	12.8	45	18	16	27	30	27.2	4	2	2	3	5	3.2	43	110	180	180	180	138.6	10	10	50	0	20	100	0	12	18	27	20	23	25	22.6	60	60	60	60	60	60	55
174	T24h	T24Ve5h-20	M	14	12	10	15	25	15.2	9	9	6	11	22	11.4	25	50	35	37	67	42.8	180	180	180	180	180	180	12	8	40	0	20	100	0	10	6	5	9	10	10	8	60	60	60	60	60	60	60	65
175	T24h	T24Ve5h-21	M	3	4	2	1		2.5	5	7	4	2		4.5	5	12	1	1	2	4.2	180	180	180	180	180	180	9	21	70	2	18	90	0	10	6	6	6	8	9	7	60	60	60	60	60	60	60	60
176	T24h	T24Ve5h-22	M	29	7	19	8	17	16	19	19	14	9	7	13.6	161	180	180	180	180	176.2	180	180	180	180	180	180	9	11	55	11	19	63.3333	0	10							60	60	60	60	60	60	50	50
177	T24h	T24P5h5-10	M	13	9	13	9	11	11	15	19	11	14	17	15.2	3	6	9	12	19	9.8	75	12	30	23	26	33.2	10	10	50	8	12	60	0	5	8	10	4	5	10	7.4	60	60	60	60	60	60	45	50
178	T24h	T24P5h5-11	M	6	10	12	25	26	15.8	10	14	14	28	29	19	13	23	19	35	24	22.8	125	108	105			112.667	12	18	60	10	10	50	0	6	14	12	12	15	13	13.2	60	60	60	60	60	60	50	40
179	T24h	T24P5h5-12	M	14	12	17	3	15	12.2	26	11	7	12	7	12.6	7	3	8	12	6	7.2	10	9	8	7	5	7.8	8	12	60	8	12	60	0	4	10	15	24			16.3333	42	60	60	60	60	56.4	50	45
180	T24h	T24P5h5-13	M	10	8	11	8	3	8	8	13	12	12	4	9.8	16	19	24	4	22	17	80	165	150			131.667	8	12	60	0	20	100	0	6	8	5	9	10	10	8.4	60	60	60	60	60	60	50	45
181	T24h	T24P5h5-14	M	15	15	24	18		18	19	21	21	24		21.25	30	23	27	12	16	21.6	28	165	85	110	60	89.6	18	12	40	6	14	70	0	11	7	6	10	18	11	10.4	60	60	60	60	60	60	50	55
182	T24h	T24P5h5-15	M	23	6	9	13	6	11.4	15	12	6	3	3	7.8	39	14	16	14	84	33.4	150	180	180	89	173	154.4	10	10	50	11	9	45	0	3	13	12	12	10	15	12.4	13	10	14	14	12	12.6	60	60
183	T24h	T24DP5h1-1	M	12	2	4	3	12	6.6	17	7	12	6	8	10	12	21	10	9	15	13.4	77	36	24	25	37	39.8	17	13	43.3333	7	13	65	0	3	16	10	4	12	6	9.6	24	40	40	30	26	32	55
184	T24h	T24DP5h1-2	M	10	18	5	11	11	11	4	1	4	3	3	3	14	13	14	11	26	15.6	20	51	56	53	79	51.8	8	12	60	5	15	75	0	5	4	7	11	6	5	6.6	6	5	6	7	5	5.8	65
185	T24h	T24DP5h1-3	M	12	12	13	17	5	11.8	17	7	15	4	13	11.2	7	5	9	4	8	6.6	36	35	48	49		42	11	9	45	4	16	80	0	4	15	12	10	9	14	12	60	60	60	60	60	60	50
186	T24h	T24DP5h1-4	M	19	12	14	14	12	14.2	17	9	12	9	6	10.6	9	22	9	32		18	59	31	35	43		42	13	7	35	6	14	70	0	3	9	6	6	7	6	6.8	20	13	12	18	20	16.6	50
187	T24h	T24DP5h1-5	M	16	25	28	7	11	17.4	12	28	24	5	8	15.4	4	7	3	10	6	6	50	5	24	13	8	20	12	8	40	5	15	75	0	4	7	5	8	9	10	7.8	60	60	60	60	60	60	50
188	T24h	T24DP5h1-6	M	10	30	25			21.6667	60	20	19			33	30	8	5	3	4	10	50	14	23			29	8	12	60	9	11	55	0	4	9	3	4	8	6	6	49	40	38			42.3333	50
189	T24h	T24DP5h-6	M	5	1	6	6	8	5.2	12	5	3	3	3	5.2	6	5	5	9	1	5.2	8	3	4	27	23	13	12	8	40	13	7	35	0	1	6	10	6	8	11	8.2	6	4	3	12	9	6.8	50
190	T24h	T24DP5h-7	M	5	15	17	12	3	10.4	7	11	8	23	7	11.2	35	16	9	9	5	14.8	70	18	135	180	150	110.6	9	11	55	0	20	100	0	4	7	10	12	12	15	11.2	14	5	9	9	8	9	45
191	T24h	T24DP5h-8	M	8	4	9	4		6.25	15	16	24	22		19.25	150					150	158					158	10	10	50	16	4	20	0	3	9	8	10	7	10	8.8	12	4	6	12		8.5	60
192	T24h	T24DP5h-9	M	15	4	8	1	4	6.4	15	19	6	2	1	8.6	8	11	2	3		6	13	10	3	9		8.75	10	10	50	11	9	45	0	2	7	8	6	8	10	7.8	6	8	14	12	13	10.6	50	50
193	T24h	T24DP5h-10	M	10	13	1	13		9.25	13	10	8	9		10	20	X	X	X	X	20	X	X	X	X	X	X	21	9	30	20	0	0	0	2	7	6	7	7	6	6.6	4	5	6	4	5	4.8	60	60
194	T24h	T24DP5h-11	M	17	6	9	1	1	6.8	13	8	3	5	4	6.6	X	X	X	X	X	X	X	X	X	X	X	X	10	10	50	8	12	60	0	5	6	9	5	10	9	7.8	20	15	12	12	14	14.6	40	40
195	T24h	T24DP7h5-1	M	6	6	11	11		8.5	10	24	17	8		14.75	9	3	4	3	2	4.2	180	180	180	180	180	180	11	9	45	12	8	40	0	10	10	14	12	18	18	14.4	60	60	60	60	60	60	65
196	T24h	T24DP7h5-2	M	28	26	18	16	14	20.4	8	38	27	4	7	16.8	26	18	28	5	3	16	36	9	23	11	9	17.6	9	16	64	3	17	85	0	7	8	10	10	9	12	9.8	60	60	60	60	60	60	55
197	T24h	T24DP7h5-3	M	7	4	5	11	2	5.8	6	5	6	12	1	6	19	2	2	5	14	8.4	70	125	147	59	180	116.2	9	11	55	0	20	100	0	10	5	6	4	3	4	4.4	60	60	60	60	60	60	45
[truncated: 6 more columns]
