# Supplementary material for: 3,6’-dithiopomalidomide reduces neural loss, inflammation, behavioral deficits in brain injury and microglial activation
Source: eLife. 2020 Jun 26;9:e54726. doi: 10.7554/eLife.54726 (PMC7375814; doi:10.7554/eLife.54726)
Supplement: Figure 3—source data 2. [file elife-54726-fig3-data2.xlsx]

## Sheet: contusion volume
	Name		total area (pixel)					contusion volume	contusion volume(%)
R	19)T24ve5h-6.png	26	46266	1779.46	50.224	224.23		0.188065	18.8065
L	19)T24ve5h-6.png	51	37565	736.569	36.626	190.554
R	24)T24ve5h-7.png	19	42188	2220.42	43.187	232.246		0.208282	20.8282
L	24)T24ve5h-7.png	98	33401	340.827	28.668	195.568
R	25)T24ve5h-8.png	12	42004	3500.33	49.461	217.144		0.203124	20.3124
L	25)T24ve5h-8.png	116	33472	288.552	33.904	191.192
R	77)T24P5h5-7.png	19	35108	1847.79	46.706	184.635		0.1018	10.18
L	77)T24P5h5-7.png	46	31534	685.522	36.246	165.897
R	78)T24P5h5-8.png	9	32429	3603.22	43.298	204.364		0.111382	11.1382
L	78)T24P5h5-8.png	29	28817	993.69	39.4	188.02
R	111)T24P5h-4.png	16	42299	2643.69	50.065	188.898		0.136103	13.6103
L	111)T24P5h-4.png	45	36542	812.044	42.661	178.772
R	132)T24ve5h-12.png	22	37714	1714.27	50.41	213.022		0.183964	18.3964
L	132)T24ve5h-12.png	35	30776	879.314	32.519	177.816
R	133)T24ve5h-13.jpg	15	40750	2716.67	45.144	211.018		0.199141	19.9141
L	133)T24ve5h-13.jpg	69	32635	472.971	36.286	197.172
R	136)T24ve5h-16.png	12	40688	3390.67	44.272	198.013		0.158302	15.8302
L	136)T24ve5h-16.png	47	34247	728.66	36.853	158.93
R	137)sh24-6.png	28	33052	1180.43	40.015	201.345		0.00293477	0.293477
L	137)sh24-6.png	14	32955	2353.93	37.716	200.747
R	138)sh24-7.png	23	32619	1418.22	36.853	162.822		0.00309635	0.309635
L	138)sh24-7.png	13	32518	2501.39	44.156	190.496
R	139)sh24-8.png	9	34546	3838.44	44.818	190.013		0.00101314	0.101314
L	139)sh24-8.png	12	34511	2875.92	34.637	196.802
R	140)sh24-9.png	32	35077	1096.16	55.004	197.145		0.00219517	0.219517
L	140)sh24-9.png	20	35000	1750	35.402	201.637
R	141)T24DP5h-1.png	30	39673	1322.43	50.808	188.889		0.0905906	9.05906
L	141)T24DP5h-1.png	82	36079	439.988	37.475	166.662
R	23)T24P5h5-6.png	23	46975	2042.39	50.376	214.326		0.0821927	8.21927
L	23)T24P5h5-6.png	64	43114	673.656	43.13	194.157						sham	sham+DP (5hr)	TBI+Veh (5hr)	TBI+Pom (5hr)	TBI+DP0.5 (5hr)	TBI+DP0.1 (5hr)	TBI+DP0.5(7hr)
R	142)T24DP5h-2.png	17	31561	1856.53	42.476	206.177		0.0836159	8.36159			0.293477	0.122035	18.8065	10.18	9.05906	12.6344	18.7707
L	142)T24DP5h-2.png	34	28922	850.647	35.85	189.437						0.309635	0.346781	20.8282	11.1382	8.36159	12.5278	16.3717
R	143)T24DP5h-3.png	22	36390	1654.09	42.238	202.088		0.0694971	6.94971			0.101314	0.35286	20.3124	13.6103	6.94971	13.4869	17.8429
L	143)T24DP5h-3.png	24	33861	1410.88	38.774	187.755						0.219517	0.173546	18.3964	8.21927	2.96001	12.8147
R	144)T24DP5h-4.png	25	33412	1336.48	43.624	206.546		0.0296001	2.96001					19.9141		5.14034
L	144)T24DP5h-4.png	14	32423	2315.93	42.69	197.052								15.8302
R	145)T24DP5h-5.png	9	36982	4109.11	44.585	201.942		0.0514034	5.14034
L	145)T24DP5h-5.png	54	35081	649.648	47.846	192.35
R	146)sh24DP5h-1.png	14	31958	2282.71	42.995	182.307		0.00122035	0.122035
L	146)sh24DP5h-1.png	23	31919	1387.78	43.641	174.971
R	147)sh24DP5h-2.png	17	34604	2035.53	45.789	195.641		0.00346781	0.346781
L	147)sh24DP5h-2.png	19	34484	1814.95	44.713	194.683
R	148)sh24DP5h-3.png	13	34858	2681.39	48.454	213.996		0.0035286	0.35286
L	148)sh24DP5h-3.png	9	34735	3859.44	42.401	207.886
R	149)sh24DP5h-4.png	21	34573	1646.33	45.158	214.291		0.00173546	0.173546
L	149)sh24DP5h-4.png	17	34513	2030.18	45.508	195.24
107/09/22
R	183)T24DP5h1-1.png	21	14785	704.048	59.199	229.173		0.126344	12.6344
L	183)T24DP5h1-1.png	13	12917	993.615	61.334	230.928
R	185)T24DP5h1-3.png	10	8086	808.6	55.007	235.904		0.125278	12.5278
L	185)T24DP5h1-3.png	17	7073	416.059	27.031	235.062
R	186)T24DP5h1-4.png	44	14445	328.295	50.684	231.974		0.0591208	5.91208
L	186)T24DP5h1-4.png	51	13591	266.49	44.572	230.35
R	187)T24DP5h1-5.png	29	16060	553.793	52.484	228.746		0.134869	13.4869
L	187)T24DP5h1-5.png	28	13894	496.214	57.278	229.647
R	188)T24DP5h1-6.png	17	17792	1046.59	68.352	235.079		0.128147	12.8147
L	188)T24DP5h1-6.png	33	15512	470.061	50.031	234.916
R	195)T24DP7h5-1.png	18	18124	1006.89	59.419	225.332		0.187707	18.7707
L	195)T24DP7h5-1.png	36	14722	408.944	51.278	218.252
R	196)T24DP7h5-2.png	13	16327	1255.92	62.155	222.751		0.163717	16.3717
L	196)T24DP7h5-2.png	17	13654	803.176	49.759	214.825
R	197)T24DP7h5-3.png	10	12823	1282.3	57.751	222.793		0.178429	17.8429
L	197)T24DP7h5-3.png	27	10535	390.185	47.869	222.653
