# Supplementary material for: 3,6’-dithiopomalidomide reduces neural loss, inflammation, behavioral deficits in brain injury and microglial activation
Source: eLife. 2020 Jun 26;9:e54726. doi: 10.7554/eLife.54726 (PMC7375814; doi:10.7554/eLife.54726)
Supplement: Figure 4—source data 1. [file elife-54726-fig4-data1.xlsx]

## Sheet: NeuN
		NeuN	average-NeuN	number/mm2
SH	138-1	199	192.667	753.362		面積
	138-2	192				583.94	um
	138-3	187				437.96	um
	140-1	150	174	680.372
	140-2	218				255742	um2
	140-3	154				0.255742	mm2
	151-1	147	142	555.246
	151-2	146
	151-3	133
	152-1	168	156	609.989
	152-2	161
	152-3	139
SH+DP	147-1	194	177.667	694.71
	147-2	180
	147-3	159
	148-1	189	176	688.193
	148-2	174
	148-3	165
	166-1	150	161.667	632.147
	166-2	183
	166-3	152
TBI+VEH	132-1	67	69.6667	272.41
	132-2	91
	132-3	51
	133-1	45	58	226.791
	133-2	88
	133-3	41
	134-1	58	57.3333	224.184
	134-2	47
	134-3	67
	173-1	50	58.6667	229.398
	173-2	52
	173-3	74
TBI+Pom	79-1	123	130.667	510.931
	79-2	164
	79-3	105
	179-1	97	106	414.48
	179-2	108
	179-3	113
	78-1	122	121	473.132
	78-2	128
	78-3	113
	178-1	84	76	297.174
	178-2	76
	178-3	68
TBI+DP0.5	143-1	161	145.333	568.28
	143-2	144
	143-3	131
	192-1	115	125.333	490.077
	192-2	129
	192-3	132
	144-1	96	140	547.426
	144-2	192
	144-3	132
	193-1	121	124.667	487.47
	193-2	113
	193-3	140
TBI+DP0.1	185-1	97	110.667	432.727
	185-2	101
	185-3	134
	184-1	83	106.667	417.086
	184-2	126
	184-3	111
	186-1	93	87.3333	341.49
	186-2	83
	186-3	86
	188-1	77	74	289.354
	188-2	71
	188-3	74
