# Supplementary material for: 3,6’-dithiopomalidomide reduces neural loss, inflammation, behavioral deficits in brain injury and microglial activation
Source: eLife. 2020 Jun 26;9:e54726. doi: 10.7554/eLife.54726 (PMC7375814; doi:10.7554/eLife.54726)
Supplement: Figure 5—source data 1. [file elife-54726-fig5-data1.xlsx]

## Sheet: FJC
GROUP	NAME	NAME		FJC+	AVERAGE		200X				Sham	Sham + DP	TBI + Veh	TBI + Pom	TBI + DP
TBI + Veh	7		1	119	113		397.887				16.4319	15.2582	397.887	239.437	132.042
			2	116			0				10.5634	21.1268	517.606	257.042	169.014
			3	104			0				14.0845	10.5634	612.676	246.479	214.789
	135		1	195	147		517.606				17.6056	17.6056	552.817	154.93	179.577
			2	102			0				17.6056	21.1268	619.718	257.042	169.014
			3	144			0
	136		1		174		612.676
			2	198			0
			3	150			0				Group Name	N	Missing	Mean	Std Dev	SEM
	133		1		157		552.817				Col 1	6	1	15.258	2.992	1.338
			2	185			0				Col 2	6	1	17.136	4.438	1.985
			3	129			0				Col 3	6	1	472.887	109.422	48.935
	134		1	174	176		619.718				Col 4	6	1	230.986	43.168	19.305
			2	168			0				Col 5	6	1	172.887	29.575	13.227
			3	186			0
TBI + Pom	78		1	96	68		239.437
			2	45			0
			3	63			0				Col 4	(P = 0.038)
	77		1	96	73		257.042				Col 5
			2	69			0
			3	54			0
	79		1	96	70		246.479
			2	57			0
			3	57			0
	101		1	30	44		154.93
			2	60			0
			3	42			0
	111		1	69	73		257.042
			2	72			0
			3	78			0
TBI + DP	142		1	33	37.5		132.042
			2	42			0
			3				0
	141		1	42	48		169.014
			2	54			0
			3				0
	143		1	75	61		214.789
			2	63			0
			3	45			0
	144		1	48	51		179.577
			2	87			0
			3	18			0
	145		1	51	48		169.014
			2	42			0
			3	51			0
Sham	137		1	5	4.66667		16.4319
			2	3			0
			3	6			0
	138		1	3	3		10.5634
	139		1	4	4		14.0845
	140		1	5	5		17.6056
	17		1	5	5		17.6056
Sham + DP	146		1	7	4.33333		15.2582
			2	3			0
			3	3			0
	147		1	6	6		21.1268
	148		1	3	3		10.5634
	149		1	5	5		17.6056
	150		1	6	6		21.1268
							0
T+DP0.1	185		1	59	59		207.746					Sham	Sham + DP	TBI + Veh	TBI + Pom	TBI + DP0.5	TBI + DP0.1
	186		1	52	47.75		168.134					16.4319	15.2582	397.887	239.437	132.042	207.746
			2	46			0					10.5634	21.1268	517.606	257.042	169.014	168.134
			3	50			0					14.0845	10.5634	612.676	246.479	214.789	159.624
				43			0					17.6056	17.6056	552.817	154.93	179.577	169.014
	187		1	47	45.3333		159.624					17.6056	21.1268	619.718	257.042	169.014
			2	37			0
			3	52			0
	188		1	34	48		169.014
			2	62
