# Supplementary material for: 3,6’-dithiopomalidomide reduces neural loss, inflammation, behavioral deficits in brain injury and microglial activation
Source: eLife. 2020 Jun 26;9:e54726. doi: 10.7554/eLife.54726 (PMC7375814; doi:10.7554/eLife.54726)
Supplement: Figure 6—source data 1. [file elife-54726-fig6-data1.xlsx]

## Sheet: 0330
LC3	LC3	LC3
NO.	Name	Ct	actin-Ct	delta CT	(-ΔΔCt)	2^(-ΔΔCt)				LC3	sham	sham+DP	T+VE	T+Pom	T+DP
17	sh24-3	21.14	18.93	2.21	0.998	1.99723	3.208	0.998	1.99723		1.99723	0.550189	0.93174	1.0196	0.506277
137	sh24-6	19.37	16.07	3.3	-0.092	0.938221		-0.092	0.938221		0.938221	0.711039	1.83783	0.443806	0.288771
138	sh24-7	20.27	17.17	3.1	0.108	1.07773		0.108	1.07773		1.07773	1.29954	0.925304	1.28165	0.654289
139	sh24-8	19.69	16.08	3.61	-0.402	0.756808		-0.402	0.756808		0.756808	0.783497	1.1235	1.29954	0.59791
140	sh24-9	19.56	15.74	3.82	-0.612	0.654289		-0.612	0.654289		0.654289	0.887611	0.610473	0.636397	0.419866
146	sh24DP5h-1	19.93	15.86	4.07	-0.862	0.550189		-0.862	0.550189				0.44074	0.58156
147	sh24DP5h-2	19.76	16.06	3.7	-0.492	0.711039		-0.492	0.711039				0.524131	0.610473
148	sh24DP5h-3	20.17	17.34	2.83	0.378	1.29954		0.378	1.29954				0.50278
149	sh24DP5h-4	20.31	16.75	3.56	-0.352	0.783497		-0.352	0.783497				0.531448
150	sh24DP5h-5	19.58	16.2	3.38	-0.172	0.887611		-0.172	0.887611				0.345798
5	T24Ve5h-2	19.98	16.67	3.31	-0.102	0.93174		-0.102	0.93174				0.383687
6	T24Ve5h-3	19.82	17.49	2.33	0.878	1.83783		0.878	1.83783
7	T24Ve5h-4	20.72	17.4	3.32	-0.112	0.925304		-0.112	0.925304
12	T24Ve5h-5	19.58	16.54	3.04	0.168	1.1235		0.168	1.1235
19	T24Ve5h-6	19.87	15.95	3.92	-0.712	0.610473		-0.712	0.610473
131	T24ve5h-11	19.73	15.34	4.39	-1.182	0.44074		-1.182	0.44074	LC3	sham	sham+DP	T+VE	T+Pom	T+DP
132	T24ve5h-12	19.03	14.89	4.14	-0.932	0.524131		-0.932	0.524131		1.99723	0.550189	0.93174	1.0196	0.506277
133	T24ve5h-13	19.75	15.55	4.2	-0.992	0.50278		-0.992	0.50278		0.938221	0.711039	1.83783	0.443806	0.288771
134	T24ve5h-14	19.59	15.47	4.12	-0.912	0.531448		-0.912	0.531448		1.07773	1.29954	0.925304	1.28165	0.654289
135	T24ve5h-15	19.82	15.08	4.74	-1.532	0.345798		-1.532	0.345798		0.756808	0.783497	1.1235	1.29954	0.59791
136	T24ve5h-16	19.57	14.98	4.59	-1.382	0.383687		-1.382	0.383687		0.654289	0.887611	0.610473	0.636397	0.419866
21	T24P5h5-5	20.74	17.56	3.18	0.028	1.0196		0.028	1.0196				0.44074	0.58156
23	T24P5h5-6	19.26	14.88	4.38	-1.172	0.443806		-1.172	0.443806				0.524131	0.610473
110	T24P5h-3	18.2	15.35	2.85	0.358	1.28165		0.358	1.28165				0.50278
111	T24P5h-4	18.72	15.89	2.83	0.378	1.29954		0.378	1.29954				0.531448
77	T24P5h5-7	19.45	15.59	3.86	-0.652	0.636397		-0.652	0.636397				0.345798
78	T24P5h5-8	19.69	15.7	3.99	-0.782	0.58156		-0.782	0.58156				0.383687
79	T24P5h5-9	20.26	16.34	3.92	-0.712	0.610473		-0.712	0.610473
141	T24DP5h-1	20.09	15.9	4.19	-0.982	0.506277		-0.982	0.506277
142	T24DP5h-2	19.47	14.47	5	-1.792	0.288771		-1.792	0.288771
143	T24DP5h-3	19.83	16.01	3.82	-0.612	0.654289		-0.612	0.654289
144	T24DP5h-4	19.94	15.99	3.95	-0.742	0.59791		-0.742	0.59791
145	T24DP5h-5	20.11	15.65	4.46	-1.252	0.419866		-1.252	0.419866
Caspase-3	Caspase-3	Caspase-3
NO.	Name	Ct	actin-Ct	delta CT	(-ΔΔCt)	2^(-ΔΔCt)				Caspase-3	sham	sham+DP	T+VE	T+Pom	T+DP
17	sh24-3	26.62	18.22	8.4	-5.192	0.027356	7.792	-5.192	0.027356		0.027356	0.0339134	0.0489686	0.0426296	0.0528483
137	sh24-6	23.35	15.5	7.85	-4.642	0.0400515		-4.642	0.0400515		0.0400515	0.0423352	0.0582338	0.094601	0.0582338
138	sh24-7	24.32	16.43	7.89	-4.682	0.0389563		-4.682	0.0389563		0.0389563	0.0260603	0.0253477	0.0707072	0.0233247
139	sh24-8	22.86	15.71	7.15	-3.942	0.0650638		-3.942	0.0650638		0.0650638	0.027167	0.082355	0.0558616	0.0426296
140	sh24-9	23.28	15.61	7.67	-4.462	0.0453737		-4.462	0.0453737		0.0453737	0.0355995	0.0795497	0.0429261	0.0161536
146	sh24DP5h-1	23.4	15.31	8.09	-4.882	0.0339134		-4.882	0.0339134				0.128336	0.152618
147	sh24DP5h-2	23.05	15.28	7.77	-4.562	0.0423352		-4.562	0.0423352				0.0702187	0.106432
148	sh24DP5h-3	25.38	16.91	8.47	-5.262	0.0260603		-5.262	0.0260603				0.0554757
149	sh24DP5h-4	25.6	17.19	8.41	-5.202	0.027167		-5.202	0.027167				0.0697337
150	sh24DP5h-5	24.35	16.33	8.02	-4.812	0.0355995		-4.812	0.0355995				0.165856
5	T24Ve5h-2	24.05	16.49	7.56	-4.352	0.0489686		-4.352	0.0489686				0.0812212
6	T24Ve5h-3	24.38	17.07	7.31	-4.102	0.0582338		-4.102	0.0582338
7	T24Ve5h-4	25.27	16.76	8.51	-5.302	0.0253477		-5.302	0.0253477
12	T24Ve5h-5	22.91	16.1	6.81	-3.602	0.082355		-3.602	0.082355	Caspase-3	sham	sham+DP	T+VE	T+Pom	T+DP
19	T24Ve5h-6	22.29	15.43	6.86	-3.652	0.0795497		-3.652	0.0795497		0.027356	0.0339134		0.0426296
131	T24ve5h-11	21.01	14.84	6.17	-2.962	0.128336		-2.962	0.128336		0.0400515	0.0423352
132	T24ve5h-12	21.82	14.78	7.04	-3.832	0.0702187		-3.832	0.0702187		0.0389563	0.0260603			0.0233247
133	T24ve5h-13	22.52	15.14	7.38	-4.172	0.0554757		-4.172	0.0554757			0.027167	0.082355	0.0558616	0.0426296
134	T24ve5h-14	22.39	15.34	7.05	-3.842	0.0697337		-3.842	0.0697337		0.0453737	0.0355995	0.0795497	0.0429261	0.0161536
135	T24ve5h-15	20.92	15.12	5.8	-2.592	0.165856		-2.592	0.165856				0.128336
136	T24ve5h-16	22.3	15.47	6.83	-3.622	0.0812212		-3.622	0.0812212
21	T24P5h5-5	24.91	17.15	7.76	-4.552	0.0426296		-4.552	0.0426296
23	T24P5h5-6	21.7	15.09	6.61	-3.402	0.094601		-3.402	0.094601
110	T24P5h-3	22.4	15.37	7.03	-3.822	0.0707072		-3.822	0.0707072				0.165856
111	T24P5h-4	23.53	16.16	7.37	-4.162	0.0558616		-4.162	0.0558616				0.0812212
77	T24P5h5-7	22.63	14.88	7.75	-4.542	0.0429261		-4.542	0.0429261
78	T24P5h5-8	20.55	14.63	5.92	-2.712	0.152618		-2.712	0.152618
79	T24P5h5-9	21.54	15.1	6.44	-3.232	0.106432		-3.232	0.106432
141	T24DP5h-1	22.97	15.52	7.45	-4.242	0.0528483		-4.242	0.0528483
142	T24DP5h-2	22.53	15.22	7.31	-4.102	0.0582338		-4.102	0.0582338
143	T24DP5h-3	24.33	15.7	8.63	-5.422	0.0233247		-5.422	0.0233247
144	T24DP5h-4	23.63	15.87	7.76	-4.552	0.0426296		-4.552	0.0426296
145	T24DP5h-5	24.81	15.65	9.16	-5.952	0.0161536		-5.952	0.0161536

## Sheet: Caspase-3
									Caspase-3	sham	sham+DP	T+VE	T+Pom	T+DP
One Way Analysis of Variance	星期二, 四月 03, 2018, 下午 04:09:41									0.0274	0.0339	0.0824	0.0426	0.0233
										0.0401	0.0423	0.0795	0.0559	0.0426
Data source: Data 1 in 20180330 Caspase-3										0.039	0.0261	0.1283	0.0429	0.0162
										0.0454	0.0272	0.1659
Normality Test:	Passed	(P = 0.087)									0.0356	0.0812
										Col 2	Col 3	Col 4	Col 5	Col 6
Equal Variance Test:	Passed	(P = 0.355)
Group Name	N	Missing	Mean	Std Dev	SEM			Mean		SEM
Col 2	5	1	0.0379	0.00759	0.00379			1		0.1
Col 3	6	1	0.033	0.00665	0.00297			0.870712		0.0783641
Col 4	6	1	0.107	0.0385	0.0172		T+Veh v.s. sham	2.82322		0.453826
Col 5	4	1	0.0471	0.00756	0.00436			1.24274		0.11504
Col 6	4	1	0.0274	0.0137	0.00791			0.722955		0.208707
Source of Variation	DF	SS	MS	F	P
Between Groups	4	0.0198	0.00495	10.944	<0.001
Residual	15	0.00678	0.000452
Total	19	0.0266
The differences in the mean values among the treatment groups are greater than would be expected by chance; there is a statistically significant difference (P = <0.001).
Power of performed test with alpha = 0.050: 0.997
All Pairwise Multiple Comparison Procedures (Tukey Test):
Comparisons for factor:
Comparison	Diff of Means	p	q	P	P<0.050
Col 4 vs. Col 6	0.0801	5	7.294	0.001	Yes
Col 4 vs. Col 3	0.0744	5	7.829	<0.001	Yes
Col 4 vs. Col 2	0.0695	5	6.893	0.002	Yes
Col 4 vs. Col 5	0.0603	5	5.494	0.011	Yes
Col 5 vs. Col 6	0.0198	5	1.61	0.784	No
Col 5 vs. Col 3	0.0141	5	1.286	0.889	Do Not Test
Col 5 vs. Col 2	0.0092	5	0.802	0.978	Do Not Test
Col 2 vs. Col 6	0.0106	5	0.92	0.964	Do Not Test
Col 2 vs. Col 3	0.00492	5	0.488	0.997	Do Not Test
Col 3 vs. Col 6	0.00565	5	0.514	0.996	Do Not Test
A result of "Do Not Test" occurs for a comparison when no significant difference is found between two means that enclose that comparison. For example, if you had four means sorted in order, and found no difference between means 4 vs. 2, then you would not test 4 vs. 3 and 3 vs. 2, but still test 4 vs. 1 and 3 vs. 1 (4 vs. 3 and 3 vs. 2 are enclosed by 4 vs. 2: 4 3 2 1). Note that not testing the …

## Sheet: Figure 6 (vi)-caspase (mRNA)
									Caspase-3	sham	sham+DP	T+VE	T+Pom	T+DP
One Way Analysis of Variance	星期二, 四月 03, 2018, 下午 04:09:41									0.0274	0.0339	0.0824	0.0426	0.0233
										0.0401	0.0423	0.0795	0.0559	0.0426
Data source: Data 1 in 20180330 Caspase-3										0.039	0.0261	0.1283	0.0429	0.0162
										0.0454	0.0272	0.1659
Normality Test:	Passed	(P = 0.087)									0.0356	0.0812
										Col 2	Col 3	Col 4	Col 5	Col 6
Equal Variance Test:	Passed	(P = 0.355)
Group Name	N	Missing	Mean	Std Dev	SEM			Mean		SEM
Col 2	5	1	0.0379	0.00759	0.00379			1		0.1
Col 3	6	1	0.033	0.00665	0.00297			0.870712		0.0783641
Col 4	6	1	0.107	0.0385	0.0172		T+Veh v.s. sham	2.82322		0.453826
Col 5	4	1	0.0471	0.00756	0.00436			1.24274		0.11504
Col 6	4	1	0.0274	0.0137	0.00791			0.722955		0.208707
Source of Variation	DF	SS	MS	F	P
Between Groups	4	0.0198	0.00495	10.944	<0.001
Residual	15	0.00678	0.000452
Total	19	0.0266
The differences in the mean values among the treatment groups are greater than would be expected by chance; there is a statistically significant difference (P = <0.001).
Power of performed test with alpha = 0.050: 0.997
All Pairwise Multiple Comparison Procedures (Tukey Test):
Comparisons for factor:
Comparison	Diff of Means	p	q	P	P<0.050
Col 4 vs. Col 6	0.0801	5	7.294	0.001	Yes
Col 4 vs. Col 3	0.0744	5	7.829	<0.001	Yes
Col 4 vs. Col 2	0.0695	5	6.893	0.002	Yes
Col 4 vs. Col 5	0.0603	5	5.494	0.011	Yes
Col 5 vs. Col 6	0.0198	5	1.61	0.784	No
Col 5 vs. Col 3	0.0141	5	1.286	0.889	Do Not Test
Col 5 vs. Col 2	0.0092	5	0.802	0.978	Do Not Test
Col 2 vs. Col 6	0.0106	5	0.92	0.964	Do Not Test
Col 2 vs. Col 3	0.00492	5	0.488	0.997	Do Not Test
Col 3 vs. Col 6	0.00565	5	0.514	0.996	Do Not Test
A result of "Do Not Test" occurs for a comparison when no significant difference is found between two means that enclose that comparison. For example, if you had four means sorted in order, and found no difference between means 4 vs. 2, then you would not test 4 vs. 3 and 3 vs. 2, but still test 4 vs. 1 and 3 vs. 1 (4 vs. 3 and 3 vs. 2 are enclosed by 4 vs. 2: 4 3 2 1). Note that not testing the …
