# Supplementary material for: 3,6’-dithiopomalidomide reduces neural loss, inflammation, behavioral deficits in brain injury and microglial activation
Source: eLife. 2020 Jun 26;9:e54726. doi: 10.7554/eLife.54726 (PMC7375814; doi:10.7554/eLife.54726)
Supplement: Figure 6—source data 2. [file elife-54726-fig6-data2.xlsx]

## Sheet: Figure 6 (vi)-caspase (IF)
Caspase-3
sham	sham+DP(0.5)	TBI+Veh	TBI+Pom(0.5)	TBI+DP(0.5)	TBI+DP(0.1)
6.76032	3.83072	28.4628	13.2724	5.09432	9.33275
3.28881	4.0854	22.4128	22.9903	4.98193	14.8309
4.7934	4.76882	30.6852	17.0869	9.63828	10.953
	2.60313			12.7558
Group Name	N	Missing	Mean	Std Dev	SEM
sham	3	0	4.948	1.741	1.005
sham+DP(0.5)	4	0	3.822	0.904	0.452
TBI+Veh	3	0	27.187	4.281	2.472
TBI+Pom(0.5)	3	0	17.783	4.896	2.827
TBI+DP(0.5)	4	0	8.118	3.777	1.889
TBI+DP(0.1)	3	0	11.706	2.825	1.631
TBI+Veh V.S. Sham	4.49454
TBI+Pom(0.5) V.S. Sham	2.59398	42.2861	TBI+Pom(0.5) V.S. TBI+Veh
TBI+DP(0.5) V.S. Sham	0.640663	85.7458	TBI+DP(0.5) V.S. TBI+Veh
TBI+DP(0.1) V.S. Sham	1.3658	69.6119	TBI+DP(0.1) V.S. TBI+Veh

## Sheet: Caspase-3
		Caspase-3	NeuN	Caspase-3/NeuN	AVERAGE		面積			sham	sham+DP(0.5)	TBI+Veh	TBI+Pom(0.5)	TBI+DP(0.5)	TBI+DP(0.1)
SH	138-1	9	110	0.0818182	0.0676032	6.76032	597.01	um		6.76032	3.83072	28.4628	13.2724	5.09432	9.33275
	138-2	7	132	0.0530303			447.76	um		3.28881	4.0854	22.4128	22.9903	4.98193	14.8309
	138-3	7	103	0.0679612						4.7934	4.76882	30.6852	17.0869	9.63828	10.953
	140-1	2	104	0.0192308	0.0328881	3.28881		um2			2.60313			12.7558
	140-2	3	116	0.0258621				mm2
	140-3	6	112	0.0535714
	137-1	4	63	0.0634921	0.047934	4.7934
	137-2	5	108	0.0462963						Group Name	N	Missing	Mean	Std Dev	SEM
	137-3	5	147	0.0340136						sham	3	0	4.948	1.741	1.005
				#DIV/0!						sham+DP(0.5)	4	0	3.822	0.904	0.452
				#DIV/0!						TBI+Veh	3	0	27.187	4.281	2.472
				#DIV/0!						TBI+Pom(0.5)	3	0	17.783	4.896	2.827
SH+DP	147-1	8	125	0.064	0.0383072	3.83072				TBI+DP(0.5)	4	0	8.118	3.777	1.889
	147-2	4	194	0.0206186						TBI+DP(0.1)	3	0	11.706	2.825	1.631
	147-3	5	165	0.030303
	148-1	3	104	0.0288462	0.040854	4.0854
	148-2	6	120	0.05						TBI+Veh V.S. Sham	4.49454
	148-3	8	183	0.0437158						TBI+Pom(0.5) V.S. Sham	2.59398	42.2861	TBI+Pom(0.5) V.S. TBI+Veh
	166-1			#DIV/0!						TBI+DP(0.5) V.S. Sham	0.640663	85.7458	TBI+DP(0.5) V.S. TBI+Veh
	166-2			#DIV/0!						TBI+DP(0.1) V.S. Sham	1.3658	69.6119	TBI+DP(0.1) V.S. TBI+Veh
	166-3			#DIV/0!
	149-1	4	169	0.0236686	0.0476882	4.76882
	149-2	4	105	0.0380952
	149-3	10	123	0.0813008
	150-1	4	219	0.0182648	0.0260313	2.60313
	150-2	6	117	0.0512821
	150-3	1	117	0.00854701
TBI+VEH	132-1	12	51	0.235294	0.284628	28.4628
	132-2	19	78	0.24359
	132-3	18	48	0.375
	133-1			#DIV/0!
	133-2			#DIV/0!
	133-3			#DIV/0!
	134-1			#DIV/0!
	134-2			#DIV/0!
	134-3			#DIV/0!
	135-1	16	61	0.262295	0.224128	22.4128
	135-2	32	100	0.32
	135-3	10	111	0.0900901
	172-1	25	72	0.347222	0.306852	30.6852
	172-2	18	75	0.24
	172-3	17	51	0.333333
TBI+Pom	79-1	11	83	0.13253	0.132724	13.2724
	79-2	10	122	0.0819672
	79-3	18	98	0.183673
	179-1			#DIV/0!
	179-2			#DIV/0!
	179-3			#DIV/0!
	78-1	12	142	0.084507	0.229903	22.9903
	78-2	40	123	0.325203
	78-3	28	100	0.28
	178-1	10	77	0.12987	0.170869	17.0869
	178-2	14	74	0.189189
	178-3	12	62	0.193548
				#DIV/0!
				#DIV/0!
				#DIV/0!
TBI+DP0.5	143-1			#DIV/0!
	143-2			#DIV/0!
	143-3			#DIV/0!
	192-1	6	123	0.0487805	0.0509432	5.09432
	192-2	3	108	0.0277778
	192-3	9	118	0.0762712
	144-1			#DIV/0!
	144-2			#DIV/0!
	144-3			#DIV/0!
	193-1	7	137	0.0510949	0.0498193	4.98193
	193-2	5	103	0.0485437
	141-1	7	78	0.0897436	0.0963828	9.63828
	141-2	10	96	0.104167
	141-3	6	63	0.0952381
	145-1	9	72	0.125	0.127558	12.7558
	145-2	14	79	0.177215
	145-3	7	87	0.0804598
TBI+DP0.1	185-1			#DIV/0!
	185-2			#DIV/0!
	185-3			#DIV/0!
	184-1			#DIV/0!
	184-2			#DIV/0!
	184-3			#DIV/0!
	186-1	8	88	0.0909091	0.0933275	9.33275
	186-2	9	103	0.0873786
	186-3	6	59	0.101695
	188-1	10	69	0.144928	0.148309	14.8309
	188-2	4	72	0.0555556
	188-3	11	45	0.244444
	187-1	6	57	0.105263	0.10953	10.953
	187-2	4	54	0.0740741
	187-3	10	67	0.149254
