# Supplementary material for: 3,6’-dithiopomalidomide reduces neural loss, inflammation, behavioral deficits in brain injury and microglial activation
Source: eLife. 2020 Jun 26;9:e54726. doi: 10.7554/eLife.54726 (PMC7375814; doi:10.7554/eLife.54726)
Supplement: Figure 7—source data 1. [file elife-54726-fig7-data1.xlsx]

## Sheet: 0916
p62	p62	p62
NO.	Name	Ct	actin CT	delta CT	(-ΔΔCt)	2^(-ΔΔCt)				p62	sham	sham+0.5DP	T+VE	T+Pom	T+0.5DP	T+0.1DP
137	sh	17.6	16.63	0.97	-0.0875	0.941152	0.8825	-0.0875	0.941152		0.941152	0.890384	0.54055	0.896577	0.61664	0.909093
138	sh	17.8	17.09	0.71	0.1725	1.12701		0.1725	1.12701		1.12701	0.854114	0.522137	0.536816	0.551908	0.890384
139	sh	17.95	17.01	0.94	-0.0575	0.960928		-0.0575	0.960928		0.960928	0.791412	0.464098	0.76977	1.03706	0.61664
140	sh	17.07	16.16	0.91	-0.0275	0.981119		-0.0275	0.981119		0.981119	0.70344	0.620929	0.748721	0.638386	0.775125
151	sh	16.66	16.31	0.35	0.5325	1.44643		0.5325	1.44643		1.44643	1.06622	0.51853	0.665495	0.909093	0.941152
146	shDP	17.24	16.19	1.05	-0.1675	0.890384		-0.1675	0.890384				0.477145		0.70344	0.529426
147	shDP	17.28	16.17	1.11	-0.2275	0.854114		-0.2275	0.854114				0.525769		0.808041
148	shDP	17.65	16.43	1.22	-0.3375	0.791412		-0.3375	0.791412
149	shDP	18.2	16.81	1.39	-0.5075	0.70344		-0.5075	0.70344
150	shDP	17.5	16.71	0.79	0.0925	1.06622		0.0925	1.06622
7	TBI+VEH	18.87	17.1	1.77	-0.8875	0.54055		-0.8875	0.54055
12	TBI+VEH	18.73	16.91	1.82	-0.9375	0.522137		-0.9375	0.522137
19	TBI+VEH	18.49	16.5	1.99	-1.1075	0.464098		-1.1075	0.464098
131	TBI+VEH	16.83	15.26	1.57	-0.6875	0.620929		-0.6875	0.620929
132	TBI+VEH	17.43	15.6	1.83	-0.9475	0.51853		-0.9475	0.51853	p62	sham	sham+0.5DP	T+VE	T+Pom	T+0.5DP	T+0.1DP
134	TBI+VEH	17.94	15.99	1.95	-1.0675	0.477145		-1.0675	0.477145
135	TBI+VEH	17.06	15.25	1.81	-0.9275	0.525769		-0.9275	0.525769
21	T+Pom	18.75	17.71	1.04	-0.1575	0.896577		-0.1575	0.896577
110	T+Pom	17.84	16.06	1.78	-0.8975	0.536816		-0.8975	0.536816
77	T+Pom	16.92	15.66	1.26	-0.3775	0.76977		-0.3775	0.76977
78	T+Pom	17.09	15.79	1.3	-0.4175	0.748721		-0.4175	0.748721
79	T+Pom	17.32	15.85	1.47	-0.5875	0.665495		-0.5875	0.665495
141	T+DP0.5	17.63	16.05	1.58	-0.6975	0.61664		-0.6975	0.61664
142	T+DP0.5	17.35	15.61	1.74	-0.8575	0.551908		-0.8575	0.551908
143	T+DP0.5	17.41	16.58	0.83	0.0525	1.03706		0.0525	1.03706
144	T+DP0.5	17.29	15.76	1.53	-0.6475	0.638386		-0.6475	0.638386
145	T+DP0.5	16.63	15.61	1.02	-0.1375	0.909093		-0.1375	0.909093
191	T+DP0.5	17.19	15.8	1.39	-0.5075	0.70344		-0.5075	0.70344
192	T+DP0.5	16.84	15.65	1.19	-0.3075	0.808041		-0.3075	0.808041
183	T+DP0.1	17.06	16.04	1.02	-0.1375	0.909093		-0.1375	0.909093
184	T+DP0.1	16.67	15.62	1.05	-0.1675	0.890384		-0.1675	0.890384
185	T+DP0.1	17.12	15.54	1.58	-0.6975	0.61664		-0.6975	0.61664	p62	sham	sham+0.5DP	T+VE	T+Pom	T+0.5DP	T+0.1DP
186	T+DP0.1	17.16	15.91	1.25	-0.3675	0.775125		-0.3675	0.775125
187	T+DP0.1	16.44	15.47	0.97	-0.0875	0.941152		-0.0875	0.941152
188	T+DP0.1	17.38	15.58	1.8	-0.9175	0.529426		-0.9175	0.529426

## Sheet: p62
								p62	sham	sham+0.5DP	T+VE	T+Pom	T+0.5DP	T+0.1DP
One Way Analysis of Variance	星期三, 九月 26, 2018, 下午 07:19:21								0.9412	0.8904	0.5406	0.8966	1.0371	0.9091
									1.127	0.8541	0.5221	0.7698	0.9091	0.8904
Data source: Data 1 in Notebook1									0.9609	0.7914	0.4641	0.7487	0.7034	0.7751
									0.9811	0.7034	0.6209	0.6655	0.808	0.9412
Normality Test:	Passed	(P = 0.070)							1.4464	1.0662	0.5185
											0.4771
Equal Variance Test:	Passed	(P = 0.362)									0.5258
									Col 1	Col 2	Col 3	Col 4	Col 5	Col 6
Group Name	N	Missing	Mean	Std Dev	SEM		Mean	SEM
Col 1	5	0	1.091	0.212	0.0946		1	0.0867094
Col 2	5	0	0.861	0.135	0.0603		0.789184	0.0552704
Col 3	7	0	0.524	0.0508	0.0192		0.480293	0.0175985	0.519707	Sham - T+Veh
Col 4	4	0	0.77	0.0956	0.0478		0.705775	0.043813
Col 5	4	0	0.864	0.142	0.0712		0.791934	0.0652612
Col 6	4	0	0.879	0.0723	0.0362		0.805683	0.0331806
Source of Variation	DF	SS	MS	F	P
Between Groups	5	1.018	0.204	12.613	<0.001
Residual	23	0.371	0.0161
Total	28	1.389
The differences in the mean values among the treatment groups are greater than would be expected by chance; there is a statistically significant difference (P = <0.001).
Power of performed test with alpha = 0.050: 1.000
All Pairwise Multiple Comparison Procedures (Tukey Test):
Comparisons for factor:
Comparison	Diff of Means	p	q	P	P<0.050
Col 1 vs. Col 3	0.567	6	10.782	<0.001	Yes
Col 1 vs. Col 4	0.321	6	5.33	0.011	Yes
Col 1 vs. Col 2	0.23	6	4.052	0.082	No
Col 1 vs. Col 5	0.227	6	3.765	0.122	Do Not Test
Col 1 vs. Col 6	0.212	6	3.524	0.168	Do Not Test
Col 6 vs. Col 3	0.355	6	6.301	0.002	Yes
Col 6 vs. Col 4	0.109	6	1.713	0.827	No
Col 6 vs. Col 2	0.0178	6	0.296	1	Do Not Test
Col 6 vs. Col 5	0.0145	6	0.229	1	Do Not Test
Col 5 vs. Col 3	0.34	6	6.043	0.004	Yes
Col 5 vs. Col 4	0.0943	6	1.484	0.896	Do Not Test
Col 5 vs. Col 2	0.0033	6	0.0547	1	Do Not Test
Col 2 vs. Col 3	0.337	6	6.406	0.002	Yes
Col 2 vs. Col 4	0.091	6	1.51	0.889	Do Not Test
Col 4 vs. Col 3	0.246	6	4.368	0.052	No
A result of "Do Not Test" occurs for a comparison when no significant difference is found between two means that enclose that comparison. For example, if you had four means sorted in order, and found no difference between means 4 vs. 2, then you would not test 4 vs. 3 and 3 vs. 2, but still test 4 vs. 1 and 3 vs. 1 (4 vs. 3 and 3 vs. 2 are enclosed by 4 vs. 2: 4 3 2 1). Note that not testing the …

## Sheet: Figure 7 (vii)-p62 (mRNA)
								p62	sham	sham+0.5DP	T+VE	T+Pom	T+0.5DP	T+0.1DP
One Way Analysis of Variance	星期三, 九月 26, 2018, 下午 07:19:21								0.9412	0.8904	0.5406	0.8966	1.0371	0.9091
									1.127	0.8541	0.5221	0.7698	0.9091	0.8904
Data source: Data 1 in Notebook1									0.9609	0.7914	0.4641	0.7487	0.7034	0.7751
									0.9811	0.7034	0.6209	0.6655	0.808	0.9412
Normality Test:	Passed	(P = 0.070)							1.4464	1.0662	0.5185
											0.4771
Equal Variance Test:	Passed	(P = 0.362)									0.5258
									Col 1	Col 2	Col 3	Col 4	Col 5	Col 6
Group Name	N	Missing	Mean	Std Dev	SEM		Mean	SEM
Col 1	5	0	1.091	0.212	0.0946		1	0.0867094
Col 2	5	0	0.861	0.135	0.0603		0.789184	0.0552704
Col 3	7	0	0.524	0.0508	0.0192		0.480293	0.0175985	0.519707	Sham - T+Veh
Col 4	4	0	0.77	0.0956	0.0478		0.705775	0.043813
Col 5	4	0	0.864	0.142	0.0712		0.791934	0.0652612
Col 6	4	0	0.879	0.0723	0.0362		0.805683	0.0331806
Source of Variation	DF	SS	MS	F	P
Between Groups	5	1.018	0.204	12.613	<0.001
Residual	23	0.371	0.0161
Total	28	1.389
The differences in the mean values among the treatment groups are greater than would be expected by chance; there is a statistically significant difference (P = <0.001).
Power of performed test with alpha = 0.050: 1.000
All Pairwise Multiple Comparison Procedures (Tukey Test):
Comparisons for factor:
Comparison	Diff of Means	p	q	P	P<0.050
Col 1 vs. Col 3	0.567	6	10.782	<0.001	Yes
Col 1 vs. Col 4	0.321	6	5.33	0.011	Yes
Col 1 vs. Col 2	0.23	6	4.052	0.082	No
Col 1 vs. Col 5	0.227	6	3.765	0.122	Do Not Test
Col 1 vs. Col 6	0.212	6	3.524	0.168	Do Not Test
Col 6 vs. Col 3	0.355	6	6.301	0.002	Yes
Col 6 vs. Col 4	0.109	6	1.713	0.827	No
Col 6 vs. Col 2	0.0178	6	0.296	1	Do Not Test
Col 6 vs. Col 5	0.0145	6	0.229	1	Do Not Test
Col 5 vs. Col 3	0.34	6	6.043	0.004	Yes
Col 5 vs. Col 4	0.0943	6	1.484	0.896	Do Not Test
Col 5 vs. Col 2	0.0033	6	0.0547	1	Do Not Test
Col 2 vs. Col 3	0.337	6	6.406	0.002	Yes
Col 2 vs. Col 4	0.091	6	1.51	0.889	Do Not Test
Col 4 vs. Col 3	0.246	6	4.368	0.052	No
A result of "Do Not Test" occurs for a comparison when no significant difference is found between two means that enclose that comparison. For example, if you had four means sorted in order, and found no difference between means 4 vs. 2, then you would not test 4 vs. 3 and 3 vs. 2, but still test 4 vs. 1 and 3 vs. 1 (4 vs. 3 and 3 vs. 2 are enclosed by 4 vs. 2: 4 3 2 1). Note that not testing the …
