# Supplementary material for: 3,6’-dithiopomalidomide reduces neural loss, inflammation, behavioral deficits in brain injury and microglial activation
Source: eLife. 2020 Jun 26;9:e54726. doi: 10.7554/eLife.54726 (PMC7375814; doi:10.7554/eLife.54726)
Supplement: Figure 7—source data 2. [file elife-54726-fig7-data2.xlsx]

## Sheet: P62
918	4	p62	GAPDH	比較值					SH	SH+DP	T+V	T+POM	T+0.5DP	T+0.1DP
SH		26344.9	27909.4	0.943944	1				1	0.978153	0.690431	0.757406	0.722507	0.820344		1	22715.8
SH+DP		15524.8	16814.1	0.923322	0.978153				1	0.94176	0.707587	0.945392	0.944621	0.917789		2	13517.2
T+V		11517.5	17672.2	0.651728	0.690431				1	1.01304	0.7412	0.901011	1.00915			3	15750.9
T+POM		12234.1	17111.9	0.714949	0.757406				1	0.901473	0.542764	0.616024	0.800616	0.81935		4	19458.3
T+0.5DP		14294.2	20959.1	0.682007	0.722507											5	12678.2
T+0.1DP		14425	18628.2	0.774359	0.820344											6	12714.4
916	2
SH		18613	20999.7	0.886347	1				0.943944	0.923322	0.651728	0.714949	0.682007	0.774359
SH+DP		16348	19584.9	0.834726	0.94176				0.886347	0.834726	0.627168	0.837945	0.837262	0.813479
T+V		7931.35	12646.3	0.627168	0.707587				0.908974	0.92083	0.673732	0.818996	0.917287
T+POM		21334.2	25460.2	0.837945	0.945392				1.09914	0.99085	0.596576	0.6771	0.879993	0.900585
T+0.5DP		17386	20765.2	0.837262	0.944621
T+0.1DP		16966.1	20856.2	0.813479	0.917789
424
SH		20423.2	22468.4	0.908974	1
SH+DP		18034.3	19584.9	0.92083	1.01304
T+V		14076.6	20893.5	0.673732	0.7412
T+POM		14213.6	17354.9	0.818996	0.901011
T+0.5DP		19047.7	20765.2	0.917287	1.00915
SH		22715.8	20666.8	1.09914	1
SH+DP		13517.2	13642	0.99085	0.901473
T+V		15750.9	26402.1	0.596576	0.542764
T+POM		20458.3	30214.6	0.6771	0.616024
T+0.5DP		18678.2	21225.4	0.879993	0.800616
T+0.1DP		18714.4	20780.2	0.900585	0.81935

## Sheet: 統計5組
									0.943944	0.923322	0.651728	0.714949	0.682007
One Way Analysis of Variance	星期三, 九月 19, 2018, 下午 05:06:55								0.886347	0.834726	0.627168	0.837945	0.837262
									0.908974	0.92083	0.673732	0.818996	0.917287
Data source: Data 1 in Notebook1									1.09914	0.99085	0.596576	0.6771	0.879993
Normality Test:	Passed	(P = 0.828)							SH	SH+DP	T+V	T+POM	T+0.5DP
Equal Variance Test:	Passed	(P = 0.709)
Group Name	N	Missing	Mean	Std Dev	SEM		Mean	SEM
Col 1	4	0	0.96	0.096	0.048		1	0.05
Col 2	4	0	0.917	0.064	0.032		0.955208	0.0333333
Col 3	4	0	0.637	0.0331	0.0166		0.663542	0.0172917
Col 4	4	0	0.762	0.0784	0.0392		0.79375	0.0408333
Col 5	4	0	0.829	0.103	0.0517		0.863542	0.0538542
Source of Variation	DF	SS	MS	F	P
Between Groups	4	0.263	0.0658	10.526	<0.001
Residual	15	0.0937	0.00625
Total	19	0.357
The differences in the mean values among the treatment groups are greater than would be expected by chance; there is a statistically significant difference (P = <0.001).
Power of performed test with alpha = 0.050: 0.996
All Pairwise Multiple Comparison Procedures (Tukey Test):
Comparisons for factor:
Comparison	Diff of Means	p	q	P	P<0.050
Col 1 vs. Col 3	0.322	5	8.155	<0.001	Yes
Col 1 vs. Col 4	0.197	5	4.993	0.022	Yes
Col 1 vs. Col 5	0.13	5	3.301	0.188	No
Col 1 vs. Col 2	0.0422	5	1.067	0.94	Do Not Test
Col 2 vs. Col 3	0.28	5	7.088	0.001	Yes
Col 2 vs. Col 4	0.155	5	3.926	0.088	No
Col 2 vs. Col 5	0.0883	5	2.234	0.531	Do Not Test
Col 5 vs. Col 3	0.192	5	4.854	0.026	Yes
Col 5 vs. Col 4	0.0669	5	1.692	0.753	Do Not Test
Col 4 vs. Col 3	0.125	5	3.161	0.22	No
A result of "Do Not Test" occurs for a comparison when no significant difference is found between two means that enclose that comparison. For example, if you had four means sorted in order, and found no difference between means 4 vs. 2, then you would not test 4 vs. 3 and 3 vs. 2, but still test 4 vs. 1 and 3 vs. 1 (4 vs. 3 and 3 vs. 2 are enclosed by 4 vs. 2: 4 3 2 1). Note that not testing the …

## Sheet: 統計6組
									0.943944	0.923322	0.651728	0.714949	0.682007	0.774359
One Way Analysis of Variance	星期三, 九月 19, 2018, 下午 05:12:31								0.886347	0.834726	0.627168	0.837945	0.837262	0.813479
									0.908974	0.92083	0.673732	0.818996	0.917287
Data source: Data 1 in Notebook1									1.09914	0.99085	0.596576	0.6771	0.879993	0.900585
									SH	SH+DP	T+V	T+POM	T+0.5DP	T+0.1DP
Normality Test:	Passed	(P = 0.782)
Equal Variance Test:	Passed	(P = 0.798)
Group Name	N	Missing	Mean	Std Dev	SEM		Mean	SEM
Col 1	4	0	0.96	0.096	0.048		1	0.05
Col 2	4	0	0.917	0.064	0.032		0.955208	0.0333333
Col 3	4	0	0.637	0.0331	0.0166		0.663542	0.0172917	0.336458
Col 4	4	0	0.762	0.0784	0.0392		0.79375	0.0408333
Col 5	4	0	0.829	0.103	0.0517		0.863542	0.0538542
Col 6	4	1	0.829	0.0646	0.0373		0.863542	0.0388542
Source of Variation	DF	SS	MS	F	P
Between Groups	5	0.263	0.0527	8.769	<0.001
Residual	17	0.102	0.006
Total	22	0.365
The differences in the mean values among the treatment groups are greater than would be expected by chance; there is a statistically significant difference (P = <0.001).
Power of performed test with alpha = 0.050: 0.994
All Pairwise Multiple Comparison Procedures (Tukey Test):
Comparisons for factor:
Comparison	Diff of Means	p	q	P	P<0.050
Col 1 vs. Col 3	0.322	6	8.319	<0.001	Yes
Col 1 vs. Col 4	0.197	6	5.094	0.023	Yes
Col 1 vs. Col 5	0.13	6	3.367	0.217	No
Col 1 vs. Col 6	0.13	6	3.109	0.288	Do Not Test
Col 1 vs. Col 2	0.0422	6	1.088	0.969	Do Not Test
Col 2 vs. Col 3	0.28	6	7.23	0.001	Yes
Col 2 vs. Col 4	0.155	6	4.005	0.1	No
Col 2 vs. Col 5	0.0883	6	2.279	0.603	Do Not Test
Col 2 vs. Col 6	0.088	6	2.102	0.677	Do Not Test
Col 6 vs. Col 3	0.192	6	4.592	0.046	Yes
Col 6 vs. Col 4	0.0672	6	1.606	0.86	Do Not Test
Col 6 vs. Col 5	0.000337	6	0.00805	1	Do Not Test
Col 5 vs. Col 3	0.192	6	4.951	0.028	Yes
Col 5 vs. Col 4	0.0669	6	1.726	0.821	Do Not Test
Col 4 vs. Col 3	0.125	6	3.225	0.255	No
A result of "Do Not Test" occurs for a comparison when no significant difference is found between two means that enclose that comparison. For example, if you had four means sorted in order, and found no difference between means 4 vs. 2, then you would not test 4 vs. 3 and 3 vs. 2, but still test 4 vs. 1 and 3 vs. 1 (4 vs. 3 and 3 vs. 2 are enclosed by 4 vs. 2: 4 3 2 1). Note that not testing the …

## Sheet: Figure 7 (vii)-p62 (WB)
									0.943944	0.923322	0.651728	0.714949	0.682007	0.774359
One Way Analysis of Variance	星期三, 九月 19, 2018, 下午 05:12:31								0.886347	0.834726	0.627168	0.837945	0.837262	0.813479
									0.908974	0.92083	0.673732	0.818996	0.917287
Data source: Data 1 in Notebook1									1.09914	0.99085	0.596576	0.6771	0.879993	0.900585
									SH	SH+DP	T+V	T+POM	T+0.5DP	T+0.1DP
Normality Test:	Passed	(P = 0.782)							Col 1	Col 2	Col 3	Col 4	Col 5	Col 6
Equal Variance Test:	Passed	(P = 0.798)
Group Name	N	Missing	Mean	Std Dev	SEM		Mean	SEM
Col 1	4	0	0.96	0.096	0.048		1	0.05
Col 2	4	0	0.917	0.064	0.032		0.955208	0.0333333
Col 3	4	0	0.637	0.0331	0.0166		0.663542	0.0172917	0.336458	Sham - T+Veh
Col 4	4	0	0.762	0.0784	0.0392		0.79375	0.0408333
Col 5	4	0	0.829	0.103	0.0517		0.863542	0.0538542
Col 6	4	1	0.829	0.0646	0.0373		0.863542	0.0388542
Source of Variation	DF	SS	MS	F	P
Between Groups	5	0.263	0.0527	8.769	<0.001
Residual	17	0.102	0.006
Total	22	0.365
The differences in the mean values among the treatment groups are greater than would be expected by chance; there is a statistically significant difference (P = <0.001).
Power of performed test with alpha = 0.050: 0.994
All Pairwise Multiple Comparison Procedures (Tukey Test):
Comparisons for factor:
Comparison	Diff of Means	p	q	P	P<0.050
Col 1 vs. Col 3	0.322	6	8.319	<0.001	Yes
Col 1 vs. Col 4	0.197	6	5.094	0.023	Yes
Col 1 vs. Col 5	0.13	6	3.367	0.217	No
Col 1 vs. Col 6	0.13	6	3.109	0.288	Do Not Test
Col 1 vs. Col 2	0.0422	6	1.088	0.969	Do Not Test
Col 2 vs. Col 3	0.28	6	7.23	0.001	Yes
Col 2 vs. Col 4	0.155	6	4.005	0.1	No
Col 2 vs. Col 5	0.0883	6	2.279	0.603	Do Not Test
Col 2 vs. Col 6	0.088	6	2.102	0.677	Do Not Test
Col 6 vs. Col 3	0.192	6	4.592	0.046	Yes
Col 6 vs. Col 4	0.0672	6	1.606	0.86	Do Not Test
Col 6 vs. Col 5	0.000337	6	0.00805	1	Do Not Test
Col 5 vs. Col 3	0.192	6	4.951	0.028	Yes
Col 5 vs. Col 4	0.0669	6	1.726	0.821	Do Not Test
Col 4 vs. Col 3	0.125	6	3.225	0.255	No
A result of "Do Not Test" occurs for a comparison when no significant difference is found between two means that enclose that comparison. For example, if you had four means sorted in order, and found no difference between means 4 vs. 2, then you would not test 4 vs. 3 and 3 vs. 2, but still test 4 vs. 1 and 3 vs. 1 (4 vs. 3 and 3 vs. 2 are enclosed by 4 vs. 2: 4 3 2 1). Note that not testing the …
