# Supplementary material for: 3,6’-dithiopomalidomide reduces neural loss, inflammation, behavioral deficits in brain injury and microglial activation
Source: eLife. 2020 Jun 26;9:e54726. doi: 10.7554/eLife.54726 (PMC7375814; doi:10.7554/eLife.54726)
Supplement: Figure 7—source data 3. [file elife-54726-fig7-data3.xlsx]

## Sheet: LC3
907		LC3-I	LC3-II	LC3-II/ LC3-I	GAPDH	比較值					SH	SH+DP	T+V	T+POM	T+0.5DP	T+0.1DP
SH		29265.1	10658.9	0.364219	30229.4	1.20485e-05					0.364219	0.360761	0.947464	0.842213	0.598876
SH+DP		29891.6	10783.7	0.360761	33903.7	1.06407e-05					0.63159	0.719985	0.956958	0.655391	0.628536
T+V		28258.2	26773.6	0.947464	30320.5	3.12483e-05					0.66369	0.468211	0.982443	0.556965	0.506908
T+POM		25280.9	21291.9	0.842213	29704.7	2.83528e-05
T+0.5DP		27657.6	16563.5	0.598876	30930	1.93623e-05
T+0.1DP
416
SH		26608.2	16805.5	0.63159	8462.93	7.46302e-05
SH+DP		21231.4	15286.3	0.719985	11388.4	6.32207e-05
T+V		25395.7	24302.6	0.956958	14017.8	6.82674e-05
T+POM		25617.9	16789.7	0.655391	13766.2	4.76087e-05
T+0.5DP		27793.9	17469.4	0.628536	25316.4	2.48272e-05
T+0.1DP
424
SH		21969.4	14580.9	0.66369
SH+DP		28267.1	13235	0.468211
T+V		23031.8	22627.4	0.982443
T+POM		18981.2	10571.9	0.556965
T+0.5DP		31028.4	15728.5	0.506908
SH
SH+DP
T+V
T+POM
T+0.5DP
T+0.1DP

## Sheet: 統計5組
									SH	SH+DP	T+V	T+POM	T+0.5DP
One Way Analysis of Variance	星期六, 九月 22, 2018, 上午 11:56:09								0.364219	0.360761	0.947464	0.842213	0.598876
									0.63159	0.719985	0.956958	0.655391	0.628536
Data source: Data 1 in Notebook1									0.66369	0.468211	0.982443	0.556965	0.506908
Normality Test:	Passed	(P = 0.814)							SH	SH+DP	T+V	T+POM	T+0.5DP
									Col 1	Col 2	Col 3	Col 4	Col 5
Equal Variance Test:	Passed	(P = 0.467)
Group Name	N	Missing	Mean	Std Dev	SEM		Mean	SEM			Mean	SEM
Col 1	3	0	0.553	0.164	0.0949		1	0.171609			0.553	0.0949
Col 2	3	0	0.516	0.184	0.106		0.933092	0.191682			0.516	0.106
Col 3	3	0	0.962	0.0181	0.0104	T+Veh v.s. sham	1.7396	0.0188065			0.962	0.0104
Col 4	3	0	0.685	0.145	0.0837		1.2387	0.151356			0.685	0.0837
Col 5	3	0	0.578	0.0634	0.0366		1.04521	0.0661844			0.578	0.0366
Source of Variation	DF	SS	MS	F	P
Between Groups	4	0.392	0.0981	5.677	0.012
Residual	10	0.173	0.0173
Total	14	0.565
The differences in the mean values among the treatment groups are greater than would be expected by chance; there is a statistically significant difference (P = 0.012).
Power of performed test with alpha = 0.050: 0.795
All Pairwise Multiple Comparison Procedures (Tukey Test):
Comparisons for factor:
Comparison	Diff of Means	p	q	P	P<0.050
Col 3 vs. Col 2	0.446	5	5.877	0.013	Yes
Col 3 vs. Col 1	0.409	5	5.392	0.022	Yes
Col 3 vs. Col 5	0.384	5	5.063	0.032	Yes
Col 3 vs. Col 4	0.277	5	3.656	0.147	No
Col 4 vs. Col 2	0.169	5	2.221	0.545	No
Col 4 vs. Col 1	0.132	5	1.735	0.737	Do Not Test
Col 4 vs. Col 5	0.107	5	1.407	0.852	Do Not Test
Col 5 vs. Col 2	0.0618	5	0.814	0.976	Do Not Test
Col 5 vs. Col 1	0.0249	5	0.329	0.999	Do Not Test
Col 1 vs. Col 2	0.0368	5	0.486	0.997	Do Not Test
A result of "Do Not Test" occurs for a comparison when no significant difference is found between two means that enclose that comparison. For example, if you had four means sorted in order, and found no difference between means 4 vs. 2, then you would not test 4 vs. 3 and 3 vs. 2, but still test 4 vs. 1 and 3 vs. 1 (4 vs. 3 and 3 vs. 2 are enclosed by 4 vs. 2: 4 3 2 1). Note that not testing the …

## Sheet: Figure 7 (vii)-LC3 (WB)
									SH	SH+DP	T+V	T+POM	T+0.5DP
One Way Analysis of Variance	星期六, 九月 22, 2018, 上午 11:56:09								0.364219	0.360761	0.947464	0.842213	0.598876
									0.63159	0.719985	0.956958	0.655391	0.628536
Data source: Data 1 in Notebook1									0.66369	0.468211	0.982443	0.556965	0.506908
Normality Test:	Passed	(P = 0.814)							SH	SH+DP	T+V	T+POM	T+0.5DP
									Col 1	Col 2	Col 3	Col 4	Col 5
Equal Variance Test:	Passed	(P = 0.467)
Group Name	N	Missing	Mean	Std Dev	SEM		Mean	SEM			Mean	SEM
Col 1	3	0	0.553	0.164	0.0949		1	0.171609			0.553	0.0949
Col 2	3	0	0.516	0.184	0.106		0.933092	0.191682			0.516	0.106
Col 3	3	0	0.962	0.0181	0.0104	T+Veh v.s. sham	1.7396	0.0188065			0.962	0.0104
Col 4	3	0	0.685	0.145	0.0837		1.2387	0.151356			0.685	0.0837
Col 5	3	0	0.578	0.0634	0.0366		1.04521	0.0661844			0.578	0.0366
Source of Variation	DF	SS	MS	F	P
Between Groups	4	0.392	0.0981	5.677	0.012
Residual	10	0.173	0.0173
Total	14	0.565
The differences in the mean values among the treatment groups are greater than would be expected by chance; there is a statistically significant difference (P = 0.012).
Power of performed test with alpha = 0.050: 0.795
All Pairwise Multiple Comparison Procedures (Tukey Test):
Comparisons for factor:
Comparison	Diff of Means	p	q	P	P<0.050
Col 3 vs. Col 2	0.446	5	5.877	0.013	Yes
Col 3 vs. Col 1	0.409	5	5.392	0.022	Yes
Col 3 vs. Col 5	0.384	5	5.063	0.032	Yes
Col 3 vs. Col 4	0.277	5	3.656	0.147	No
Col 4 vs. Col 2	0.169	5	2.221	0.545	No
Col 4 vs. Col 1	0.132	5	1.735	0.737	Do Not Test
Col 4 vs. Col 5	0.107	5	1.407	0.852	Do Not Test
Col 5 vs. Col 2	0.0618	5	0.814	0.976	Do Not Test
Col 5 vs. Col 1	0.0249	5	0.329	0.999	Do Not Test
Col 1 vs. Col 2	0.0368	5	0.486	0.997	Do Not Test
A result of "Do Not Test" occurs for a comparison when no significant difference is found between two means that enclose that comparison. For example, if you had four means sorted in order, and found no difference between means 4 vs. 2, then you would not test 4 vs. 3 and 3 vs. 2, but still test 4 vs. 1 and 3 vs. 1 (4 vs. 3 and 3 vs. 2 are enclosed by 4 vs. 2: 4 3 2 1). Note that not testing the …
