# Supplementary material for: 3,6’-dithiopomalidomide reduces neural loss, inflammation, behavioral deficits in brain injury and microglial activation
Source: eLife. 2020 Jun 26;9:e54726. doi: 10.7554/eLife.54726 (PMC7375814; doi:10.7554/eLife.54726)
Supplement: Figure 8—source data 1. [file elife-54726-fig8-data1.xlsx]

## Sheet: GFAP
		GFAP	average-GFAP			面積			sham	sham+DP(0.5)	TBI+Veh	TBI+Pom(0.5)	TBI+DP(0.5)	TBI+DP(0.1)
SH	138-1	37	44.6667	174.655		583.94	um		174.655	169.441	280.23	256.769	199.419	183.779
	138-2	51				437.96	um		140.767	127.081	289.354	188.992	151.194	169.441
	138-3	46							143.373	145.98	229.398	238.521	160.318	192.902
	140-1	35	36	140.767		255742	um2		121.216		261.982	237.218	164.228
	140-2	37				0.255742	mm2
	140-3	36
	151-1	35	36.6667	143.373
	151-2	39							Group Name	N	Missing	Mean	Std Dev	SEM
	151-3	36							sham	4	0	145.003	22.103	11.052
	152-1	35	31	121.216					sham+DP(0.5)	3	0	147.501	21.221	12.252
	152-2	35							TBI+Veh	4	0	265.241	26.467	13.233
	152-3	23							TBI+Pom(0.5)	4	0	230.375	28.996	14.498
SH+DP	147-1	38	43.3333	169.441	53.2	60.6667	237.218		TBI+DP(0.5)	4	0	168.79	21.138	10.569
	147-2	49			68.6				TBI+DP(0.1)	3	0	182.041	11.827	6.828
	147-3	43			60.2
	148-1	32	32.5	127.081	44.8	45.5	177.913
	148-3	33			46.2				TBI+Veh V.S. Sham	0.82921
	166-1	36	37.3333	145.98	50.4	52.2667	204.372		TBI+Pom(0.5) V.S. Sham	0.58876	28.9975	TBI+Pom(0.5) V.S. TBI+Veh
	166-2	39			54.6				TBI+DP(0.5) V.S. Sham	0.164045	80.2167	TBI+DP(0.5) V.S. TBI+Veh
	166-3	37			51.8				TBI+DP(0.1) V.S. Sham	0.255429	69.1961	TBI+DP(0.1) V.S. TBI+Veh
TBI+VEH	132-1	80	71.6667	280.23	112	100.333	392.322
	132-2	65			91
	132-3	70			98
	133-1	78	74	289.354	109.2	103.6	405.095
	133-2	75			105
	133-3	69			96.6
	134-1	64	58.6667	229.398	89.6	82.1333	321.157
	134-2	61			85.4
	134-3	51			71.4
	173-1	75	67	261.982	105	93.8	366.775
	173-2	63			88.2
	173-3	63			88.2
TBI+Pom	79-1	62	65.6667	256.769	86.8	91.9333	359.476
	79-2	66			92.4
	79-3	69			96.6
	179-1	49	48.3333	188.992	68.6	67.6667	264.589
	179-2	40			56
	179-3	56			78.4
	78-1	54	61	238.521	75.6	85.4	333.93
	78-2	53			74.2
	78-3	76			106.4
	178-1	49	60.6667	237.218	68.6	84.9333	332.105
	178-2	64			89.6
	178-3	69			96.6
TBI+DP0.5	143-1	70	51	199.419	126	91.8	358.955
	143-2	39			70.2
	143-3	44			79.2
	192-1	40	38.6667	151.194	72	69.6	272.149
	192-2	41			73.8
	192-3	35			63
	144-1	38	41	160.318	68.4	73.8	288.572
	144-2	37			66.6
	144-3	48			86.4
	193-1	41	42	164.228	73.8	75.6	295.61
	193-2	33			59.4
	193-3	52			93.6
TBI+DP0.1	185-1	44	47	183.779
	185-2	51
	185-3	46
	184-1	57	43.3333	169.441
	184-2	38
	184-3	35
	186-1	54	49.3333	192.902
	186-2	58
	186-3	36
	188-1	36	41
	188-2	48
	188-3	39

## Sheet: Figure 8 (viii)-GFAP
GFAP
sham	sham+DP(0.5)	TBI+Veh	TBI+Pom(0.5)	TBI+DP(0.5)	TBI+DP(0.1)
174.655	169.441	280.23	256.769	199.419	183.779
140.767	127.081	289.354	188.992	151.194	169.441
143.373	145.98	229.398	238.521	160.318	192.902
121.216		261.982	237.218	164.228
Group Name	N	Missing	Mean	Std Dev	SEM
sham	4	0	145.003	22.103	11.052
sham+DP(0.5)	3	0	147.501	21.221	12.252
TBI+Veh	4	0	265.241	26.467	13.233
TBI+Pom(0.5)	4	0	230.375	28.996	14.498
TBI+DP(0.5)	4	0	168.79	21.138	10.569
TBI+DP(0.1)	3	0	182.041	11.827	6.828
TBI+Veh V.S. Sham	0.82921
TBI+Pom(0.5) V.S. Sham	0.58876	28.9975	TBI+Pom(0.5) V.S. TBI+Veh
TBI+DP(0.5) V.S. Sham	0.164045	80.2167	TBI+DP(0.5) V.S. TBI+Veh
TBI+DP(0.1) V.S. Sham	0.255429	69.1961	TBI+DP(0.1) V.S. TBI+Veh
