# Supplementary material for: 3,6’-dithiopomalidomide reduces neural loss, inflammation, behavioral deficits in brain injury and microglial activation
Source: eLife. 2020 Jun 26;9:e54726. doi: 10.7554/eLife.54726 (PMC7375814; doi:10.7554/eLife.54726)
Supplement: Figure 9—source data 1. [file elife-54726-fig9-data1.xlsx]

## Sheet: Iba-1
		resting(N)			active(N)				resting(%)	active(%)	Activated/Resting	average resting(%)	average active(%)	Activated/Resting	Iba-1	average-Iba-1	Iba1/mm2		面積			sham	sham+DP(0.5)	TBI+Veh	TBI+Pom(0.5)	TBI+DP(0.5)	TBI+DP(0.1)
SH	138-1	16	78.3668	52.3288	5	20.2237	12.8926	0.761905	0.79224	0.20776	0.262244	0.801369	0.198631	0.247864	21	26	97.2628	77.8102	597.01	um		97.2628	58.6071	144.647	117.214	81.0523	49.8784
	138-2	22			5			0.814815							27		0		447.76	um		76.0645	76.0645	147.141	117.214	99.7567	83.5463
	138-3	24			6			0.8							30		0					91.028	97.2628	130.931	81.0523	79.8054	79.8054
	139-1	16	61.9351		5	15.1678		0.761905	0.804511	0.195489	0.242991				21	20.3333	76.0645	60.8516	267317	um2		57.3601	98.5098	150.882	62.3479	67.3358	74.8175
	139-2	16			3			0.842105							19		0		0.267317	mm2
	139-3	17			4			0.809524							21		0
	140-1	22	74.5749		5	17.6957		0.814815	0.808221	0.191779	0.237285				27	24.3333	91.028	72.8224				Group Name	N	Missing	Mean	Std Dev	SEM
	140-2	19			5			0.791667							24		0					sham	4	0	80.429	17.766	8.883		64.3432	16.0858
	140-3	18			4			0.818182							22		0					sham+DP(0.5)	4	0	82.611	19.031	9.515		66.0888	16.5222
	151-1	9	46.7673		3	11.3758		0.75	0.800505	0.199495	0.249211				12	15.3333	57.3601	45.8881				TBI+Veh	4	0	143.4	8.699	4.349		30.114	113.286
	151-2	18			4			0.818182							22		0					TBI+Pom(0.5)	4	0	94.457	27.365	13.682		31.1708	63.2862
	151-3	10			2			0.833333							12		0					TBI+DP(0.5)	4	0	81.988	13.367	6.684		33.6151	48.3729
SH+DP	146-1	11	48.0313	53.5928	3	11.3758	13.3982	0.785714	0.807248	0.192752	0.238777	0.798182	0.201818	0.252848	14	15.6667	58.6071	46.8857				TBI+DP(0.1)	4	0	72.012	15.183	7.591		25.2042	46.8078
	146-2	14			3			0.823529							17		0
	146-3	13			3			0.8125							16		0
	147-1	18	60.6711		3	16.4318		0.857143	0.780664	0.219336	0.280961				21	20.3333	76.0645	60.8516				TBI+Veh V.S. Sham	0.782939
	147-2	18			4			0.818182							22		0					TBI+Pom(0.5) V.S. Sham	0.174415	60.8524	TBI+Pom(0.5) V.S. TBI+Veh
	147-3	12			6			0.666667							18		0					TBI+DP(0.5) V.S. Sham	0.0193836	97.5243	TBI+DP(0.5) V.S. TBI+Veh
	148-1	24	78.3668		7	20.2237		0.774194	0.797458	0.202542	0.253984				31	26	97.2628	77.8102				TBI+DP(0.1) V.S. Sham	-0.104651	113.366	TBI+DP(0.1) V.S. TBI+Veh
	148-2	18			4			0.818182							22		0
	148-3	20			5			0.8							25		0
	149-1	18	80.8948		7	18.9597		0.72	0.807356	0.192644	0.23861				25	26.3333	98.5098	78.8078
	149-2	25			4			0.862069							29		0
	149-3	21			4			0.84							25		0
TBI+VEH	132-1	5	41.7114	24.5212	28	106.174	91.5122	0.151515	0.272088	0.727912	2.67528	0.207681	0.792319	3.81509	32	38.6667	144.647	30.3759
	132-2	12			25			0.324324							37	58	216.971
	132-3	16			31			0.340426							47		0
	133-1	10	31.5995		44	130.19		0.185185	0.196771	0.803229	4.08205				44	39.3333	147.141	30.8996
	133-2	8			31			0.205128							39	59	220.712
	133-3	7			28			0.2							35		0
	134-1	5	22.7517		27	107.438		0.15625	0.172543	0.827457	4.79567				32	35	130.931	27.4954
	134-2	5			27			0.15625							32	52.5	196.396
	134-3	8			31			0.205128							41		0
	135-1	6	26.5436		28	113.758		0.176471	0.18932	0.81068	4.28206				34	40.3333	150.882	31.6852
	135-2	6			24			0.2							40	60.5	226.323
	135-3	9			38			0.191489							47		0
TBI+Pom	78-1	12	41.7114	25.2796	15	77.1029	49.2953	0.444444	0.347022	0.652978	1.88166	0.331253	0.668747	2.01884	27	31.3333	117.214	38.6807
	78-2	6			20			0.230769							26	47	175.821
	78-3	15			26			0.365854							41		0
	79-1	16	41.7114		16	74.5749		0.5	0.356878	0.643122	1.80208				32	31.3333	117.214	38.6807
	79-2	7			24			0.225806							33	47	175.821
	79-3	10			19			0.344828							29		0
	177-1	5	24.0156		11	50.5592		0.3125	0.322283	0.677717	2.10287				16	21.6667	81.0523	26.7473
	177-2	7			16			0.304348							23	32.5	121.579
	177-3	7			13			0.35							26		0
	178-1	7	18.9597		14	44.2393		0.333333	0.29883	0.70117	2.34638				21	16.6667	62.3479	20.5748
	178-2	3			7			0.3							10	25	93.5219
	178-3	5			14			0.263158							19		0
TBI+DP0.5	143-1	8	34.1275	27.0492	12	48.0313	37.9194	0.4	0.413095	0.586905	1.42075	0.414732	0.585268	1.41119	20	21.6667	81.0523	33.2315
	143-2	11			13			0.458333							24	32.5	121.579
	143-3	8			13			0.380952							21		0
	145-1	12	42.9754		13	58.1431		0.48	0.428789	0.571211	1.33215				25	26.6667	99.7567	40.9003
	145-2	12			14			0.461538							26	40	149.635
	145-3	10			19			0.344828							29		0
	192-1	6	31.5995		10	41.7114		0.375	0.425	0.575	1.35294				22	21.3333	79.8054	32.7202
	192-2	11			11			0.5							22	32	119.708
	192-3	8			12			0.4							20		0
	193-1	5	26.5436		11	41.7114		0.3125	0.392045	0.607955	1.55072				16	18	67.3358	27.6077
	193-2	8			14			0.363636							22	27	101.004
	193-3	8			8			0.5							16		0
TBI+DP0.1	183-1	8	27.8076	22.2461	2	21.4877	34.3803	0.8	0.590476	0.409524	0.693548	0.35315	0.64685	1.83166	11	13.3333	49.8784	17.4574
	183-2	6			9			0.4							15		0
	183-3	8			6			0.571429							14		0
	186-1	8	30.3355		16	54.3512		0.333333	0.358213	0.641787	1.79164				24	22.3333	83.5463	29.2412
	186-2	7			13			0.35							20		0
	186-3	9			14			0.391304							23		0
	187-1	8	27.8076		17	50.5592		0.32	0.347071	0.652929	1.88126				25	21.3333	79.8054	27.9319
	187-2	10			12			0.454545							24		0
	187-3	4			11			0.266667							15		0
	188-1	9	25.2796		15	45.5033		0.375	0.354167	0.645833	1.82353				24	20	74.8175	26.1861
	188-2	6			10			0.375							16		0
	188-3	5			11			0.3125							20		0

## Sheet: Figure 9 (iX)-Iba-1
Iba-1
sham	sham+DP(0.5)	TBI+Veh	TBI+Pom(0.5)	TBI+DP(0.5)	TBI+DP(0.1)
97.2628	58.6071	144.647	117.214	81.0523	49.8784
76.0645	76.0645	147.141	117.214	99.7567	83.5463
91.028	97.2628	130.931	81.0523	79.8054	79.8054
57.3601	98.5098	150.882	62.3479	67.3358	74.8175
Group Name	N	Missing	Mean	Std Dev	SEM
sham	4	0	80.429	17.766	8.883
sham+DP(0.5)	4	0	82.611	19.031	9.515
TBI+Veh	4	0	143.4	8.699	4.349
TBI+Pom(0.5)	4	0	94.457	27.365	13.682
TBI+DP(0.5)	4	0	81.988	13.367	6.684
TBI+DP(0.1)	4	0	72.012	15.183	7.591
TBI+Veh V.S. Sham	0.782939
TBI+Pom(0.5) V.S. Sham	0.174415	77.7231	TBI+Pom(0.5) V.S. TBI+Veh
TBI+DP(0.5) V.S. Sham	0.0193836	97.5243	TBI+DP(0.5) V.S. TBI+Veh
TBI+DP(0.1) V.S. Sham	-0.104651	113.366	TBI+DP(0.1) V.S. TBI+Veh
