# Supplementary material for: 3,6’-dithiopomalidomide reduces neural loss, inflammation, behavioral deficits in brain injury and microglial activation
Source: eLife. 2020 Jun 26;9:e54726. doi: 10.7554/eLife.54726 (PMC7375814; doi:10.7554/eLife.54726)
Supplement: Figure 10—source data 1. [file elife-54726-fig10-data1.xlsx]

## Sheet: TNF-alpha
								TNF-alpha	sham	sham+0.5DP	T+VE	T+Pom	T+0.5DP	T+0.1DP
One Way Analysis of Variance	星期三, 九月 26, 2018, 下午 01:40:40								0.713	0.6746	2.8719	1.1583	1.1663	1.2329
									0.5633	0.8538	2.5001	1.2941	0.7802	1.8302
Data source: Data 1 in Notebook1									0.9408	0.8078	2.5403	3.1427	1.2075	1.4866
									1.0512	0.713	2.2115		0.5633	0.9215
Normality Test:	Passed	(P = 0.261)
Equal Variance Test:	Passed	(P = 0.086)							Col 1	Col 2	Col 3	Col 4	Col 5	Col 6
Group Name	N	Missing	Mean	Std Dev	SEM		Mean	SEM
Col 1	4	0	0.817	0.22	0.11		1	0.134639
Col 2	4	0	0.762	0.0828	0.0414		0.932681	0.0506732
Col 3	4	0	2.531	0.27	0.135		3.09792	0.165239
Col 4	3	0	1.865	1.109	0.64		2.28274	0.783354
Col 5	4	0	0.929	0.311	0.155		1.13709	0.189718
Col 6	4	0	1.368	0.385	0.193		1.67442	0.23623
Source of Variation	DF	SS	MS	F	P
Between Groups	5	9.6	1.92	9.122	<0.001
Residual	17	3.578	0.21
Total	22	13.178
The differences in the mean values among the treatment groups are greater than would be expected by chance; there is a statistically significant difference (P = <0.001).
Power of performed test with alpha = 0.050: 0.996
All Pairwise Multiple Comparison Procedures (Tukey Test):
Comparisons for factor:
Comparison	Diff of Means	p	q	P	P<0.050
Col 3 vs. Col 2	1.769	6	7.71	<0.001	Yes
Col 3 vs. Col 1	1.714	6	7.471	<0.001	Yes
Col 3 vs. Col 5	1.602	6	6.982	0.002	Yes
Col 3 vs. Col 6	1.163	6	5.071	0.023	Yes
Col 3 vs. Col 4	0.666	6	2.688	0.435	No
Col 4 vs. Col 2	1.103	6	4.451	0.055	No
Col 4 vs. Col 1	1.048	6	4.23	0.074	Do Not Test
Col 4 vs. Col 5	0.936	6	3.777	0.133	Do Not Test
Col 4 vs. Col 6	0.497	6	2.007	0.716	Do Not Test
Col 6 vs. Col 2	0.606	6	2.64	0.454	Do Not Test
Col 6 vs. Col 1	0.551	6	2.401	0.551	Do Not Test
Col 6 vs. Col 5	0.438	6	1.911	0.754	Do Not Test
Col 5 vs. Col 2	0.167	6	0.728	0.995	Do Not Test
Col 5 vs. Col 1	0.112	6	0.489	0.999	Do Not Test
Col 1 vs. Col 2	0.0548	6	0.239	1	Do Not Test
A result of "Do Not Test" occurs for a comparison when no significant difference is found between two means that enclose that comparison. For example, if you had four means sorted in order, and found no difference between means 4 vs. 2, then you would not test 4 vs. 3 and 3 vs. 2, but still test 4 vs. 1 and 3 vs. 1 (4 vs. 3 and 3 vs. 2 are enclosed by 4 vs. 2: 4 3 2 1). Note that not testing the …
