# Supplementary material for: 3,6’-dithiopomalidomide reduces neural loss, inflammation, behavioral deficits in brain injury and microglial activation
Source: eLife. 2020 Jun 26;9:e54726. doi: 10.7554/eLife.54726 (PMC7375814; doi:10.7554/eLife.54726)
Supplement: Figure 10—source data 2. [file elife-54726-fig10-data2.xlsx]

## Sheet: 0916
IL-6	IL-6	IL-6
NO.	Name	Ct	actin CT	delta CT	(-ΔΔCt)	2^(-ΔΔCt)				IL-6	sham	sham+0.5DP	T+VE	T+Pom	T+0.5DP	T+0.1DP
137	sh	28.22	16.48	11.74	0.472	1.38703	12.212	0.472	1.38703		1.38703	0.836246	1.805	1.48658	1.88165	1.42603
138	sh	29.1	16.39	12.71	-0.498	0.708088		-0.498	0.708088		0.708088	1.38703	10.3532	0.974004	2.30058	16.1336
139	sh	28.92	16.66	12.26	-0.048	0.967276		-0.048	0.967276		0.967276	0.802181	3.48703	1.81756	0.334946	2.19162
140	sh	27.95	15.91	12.04	0.172	1.12662		0.172	1.12662		1.12662	0.967276	2.38171	12.4839	4.76343	2.17648
151	sh	28.46	16.15	12.31	-0.098	0.934327		-0.098	0.934327		0.934327	0.674551	2.30058	14.0451	0.698339	1.40639
146	shDP	28.55	16.08	12.47	-0.258	0.836246		-0.258	0.836246				1.78015		0.967276	2.0734
147	shDP	28.12	16.38	11.74	0.472	1.38703		0.472	1.38703				4.73052		0.683968
148	shDP	27.63	15.1	12.53	-0.318	0.802181		-0.318	0.802181
149	shDP	28.66	16.4	12.26	-0.048	0.967276		-0.048	0.967276
150	shDP	29.32	16.54	12.78	-0.568	0.674551		-0.568	0.674551
7	TBI+VEH	28.99	17.63	11.36	0.852	1.805		0.852	1.805
12	TBI+VEH	25.14	16.3	8.84	3.372	10.3532		3.372	10.3532
19	TBI+VEH	27.35	16.94	10.41	1.802	3.48703		1.802	3.48703
131	TBI+VEH	25.95	14.99	10.96	1.252	2.38171		1.252	2.38171
132	TBI+VEH	26.06	15.05	11.01	1.202	2.30058		1.202	2.30058	IL-6	sham	sham+0.5DP	T+VE	T+Pom	T+0.5DP	T+0.1DP
134	TBI+VEH	27.23	15.85	11.38	0.832	1.78015		0.832	1.78015			0.836246		1.48658		1.42603
135	TBI+VEH	25.23	15.26	9.97	2.242	4.73052		2.242	4.73052		0.708088			0.974004
21	T+Pom	29.19	17.55	11.64	0.572	1.48658		0.572	1.48658		0.967276	0.802181	3.48703	1.81756	0.334946
110	T+Pom	28.72	16.47	12.25	-0.038	0.974004		-0.038	0.974004				2.38171
77	T+Pom	26.41	15.06	11.35	0.862	1.81756		0.862	1.81756		0.934327	0.674551	2.30058		0.698339	1.40639
78	T+Pom	24.27	15.7	8.57	3.642	12.4839		3.642	12.4839				1.78015		0.967276	2.0734
79	T+Pom	24.11	15.71	8.4	3.812	14.0451		3.812	14.0451						0.683968
141	T+DP0.5	26.51	15.21	11.3	0.912	1.88165		0.912	1.88165
142	T+DP0.5	25.86	14.85	11.01	1.202	2.30058		1.202	2.30058
143	T+DP0.5	28.99	15.2	13.79	-1.578	0.334946		-1.578	0.334946
144	T+DP0.5	25.22	15.26	9.96	2.252	4.76343		2.252	4.76343
145	T+DP0.5	27.45	14.72	12.73	-0.518	0.698339		-0.518	0.698339
191	T+DP0.5	27.9	15.64	12.26	-0.048	0.967276		-0.048	0.967276
192	T+DP0.5	28.49	15.73	12.76	-0.548	0.683968		-0.548	0.683968
183	T+DP0.1	27.57	15.87	11.7	0.512	1.42603		0.512	1.42603
184	T+DP0.1	23.99	15.79	8.2	4.012	16.1336		4.012	16.1336
185	T+DP0.1	25.78	14.7	11.08	1.132	2.19162		1.132	2.19162	IL-6	sham	sham+0.5DP	T+VE	T+Pom	T+0.5DP	T+0.1DP
186	T+DP0.1	26.71	15.62	11.09	1.122	2.17648		1.122	2.17648		0.7081	0.8362	3.487	1.4866	0.3349	1.426
187	T+DP0.1	27.37	15.65	11.72	0.492	1.40639		0.492	1.40639		0.9673	0.8022	2.3817	0.974	0.6983	1.4064
188	T+DP0.1	27.48	16.32	11.16	1.052	2.0734		1.052	2.0734		0.9343	0.6746	2.3006	1.8176	0.9673	2.0734
															0.684

## Sheet: IL-6
								IL-6	sham	sham+0.5DP	T+VE	T+Pom	T+0.5DP	T+0.1DP
One Way Analysis of Variance	星期日, 九月 16, 2018, 下午 10:13:12								0.7081	0.8362	3.487	1.4866	0.3349	1.426
									0.9673	0.8022	2.3817	0.974	0.6983	1.4064
Data source: Data 1 in Notebook1									0.9343	0.6746	2.3006	1.8176	0.9673	2.0734
													0.684
Normality Test:	Passed	(P = 0.083)
Equal Variance Test:	Passed	(P = 0.589)							Col 2	Col 3	Col 4	Col 5	Col 6	Col 7
Group Name	N	Missing	Mean	Std Dev	SEM		Mean	SEM
Col 2	4	1	0.87	0.141	0.0815		1	0.0936782
Col 3	4	1	0.771	0.0852	0.0492		0.886207	0.0565517
Col 4	4	1	2.723	0.663	0.383		3.12989	0.44023
Col 5	4	1	1.426	0.425	0.245		1.63908	0.281609
Col 6	5	1	0.671	0.259	0.13		0.771264	0.149425
Col 7	4	1	1.635	0.38	0.219		1.87931	0.251724
Source of Variation	DF	SS	MS	F	P
Between Groups	5	9.433	1.887	13.748	<0.001
Residual	13	1.784	0.137
Total	18	11.217
The differences in the mean values among the treatment groups are greater than would be expected by chance; there is a statistically significant difference (P = <0.001).
Power of performed test with alpha = 0.050: 1.000
All Pairwise Multiple Comparison Procedures (Tukey Test):
Comparisons for factor:
Comparison	Diff of Means	p	q	P	P<0.050
Col 4 vs. Col 6	2.052	6	10.256	<0.001	Yes
Col 4 vs. Col 3	1.952	6	9.127	<0.001	Yes
Col 4 vs. Col 2	1.853	6	8.665	<0.001	Yes
Col 4 vs. Col 5	1.297	6	6.064	0.009	Yes
Col 4 vs. Col 7	1.088	6	5.086	0.031	Yes
Col 7 vs. Col 6	0.964	6	4.819	0.043	Yes
Col 7 vs. Col 3	0.864	6	4.041	0.109	No
Col 7 vs. Col 2	0.765	6	3.578	0.185	Do Not Test
Col 7 vs. Col 5	0.209	6	0.978	0.98	Do Not Test
Col 5 vs. Col 6	0.755	6	3.773	0.149	No
Col 5 vs. Col 3	0.655	6	3.063	0.315	Do Not Test
Col 5 vs. Col 2	0.556	6	2.6	0.477	Do Not Test
Col 2 vs. Col 6	0.199	6	0.994	0.978	Do Not Test
Col 2 vs. Col 3	0.0989	6	0.462	0.999	Do Not Test
Col 3 vs. Col 6	0.0999	6	0.499	0.999	Do Not Test
A result of "Do Not Test" occurs for a comparison when no significant difference is found between two means that enclose that comparison. For example, if you had four means sorted in order, and found no difference between means 4 vs. 2, then you would not test 4 vs. 3 and 3 vs. 2, but still test 4 vs. 1 and 3 vs. 1 (4 vs. 3 and 3 vs. 2 are enclosed by 4 vs. 2: 4 3 2 1). Note that not testing the …
