# Supplementary material for: 3,6’-dithiopomalidomide reduces neural loss, inflammation, behavioral deficits in brain injury and microglial activation
Source: eLife. 2020 Jun 26;9:e54726. doi: 10.7554/eLife.54726 (PMC7375814; doi:10.7554/eLife.54726)
Supplement: Figure 10—source data 3. [file elife-54726-fig10-data3.xlsx]

## Sheet: 0916
IL-1beta	IL-1beta	IL-1beta
NO.	Name	Ct	actin CT	delta CT	(-ΔΔCt)	2^(-ΔΔCt)				IL-1beta	sham	sham+0.5DP	T+VE	T+Pom	T+0.5DP	T+0.1DP
137	sh	29.91	18.59	11.32	-0.656	0.634635	10.664	-0.656	0.634635		0.634635	0.511923	3.59004	0.89751	0.280097	3.64016
138	sh	29.68	19.04	10.64	0.024	1.01677		0.024	1.01677		1.01677	0.916369	6.0377	0.68968	0.99585	3.79474
139	sh	29.41	18.8	10.61	0.054	1.03814		0.054	1.03814		1.03814	0.497925	6.9355	3.14705	0.471066	2.81669
140	sh	27.58	17.77	9.81	0.854	1.80751		0.854	1.80751		1.80751	0.968618	2.53854	1.16797	0.613017	1.57352
151	sh	28.96	18.02	10.94	-0.276	0.825878		-0.276	0.825878		0.825878	0.600402	0.825878	1.83274	1.64035	1.14393
146	shDP	30.11	18.48	11.63	-0.966	0.511923		-0.966	0.511923				4.67187		0.770571	1.58447
147	shDP	28.91	18.12	10.79	-0.126	0.916369		-0.126	0.916369				1.17609		0.541112
148	shDP	29.94	18.27	11.67	-1.006	0.497925		-1.006	0.497925
149	shDP	29.77	19.06	10.71	-0.046	0.968618		-0.046	0.968618				3.80527	2.27837	0.378404
150	shDP	29.8	18.4	11.4	-0.736	0.600402		-0.736	0.600402				4.95196	2.74727
7	TBI+VEH	28.1	19.28	8.82	1.844	3.59004		1.844	3.59004
12	TBI+VEH	27.09	19.02	8.07	2.594	6.0377		2.594	6.0377
19	TBI+VEH	26.38	18.51	7.87	2.794	6.9355		2.794	6.9355
131	TBI+VEH	26.48	17.16	9.32	1.344	2.53854		1.344	2.53854
132	TBI+VEH	28.33	17.39	10.94	-0.276	0.825878		-0.276	0.825878	IL-1beta	sham	sham+0.5DP	T+VE	T+Pom	T+0.5DP	T+0.1DP
134	TBI+VEH	26.26	17.82	8.44	2.224	4.67187		2.224	4.67187			0.511923	3.59004		0.2801
135	TBI+VEH	27.72	17.29	10.43	0.234	1.17609		0.234	1.17609		1.01677				0.99585
21	T+Pom	30.9	20.08	10.82	-0.156	0.89751		-0.156	0.89751		1.03814	0.497925			0.471066	2.81669
110	T+Pom	28.93	17.73	11.2	-0.536	0.68968		-0.536	0.68968					1.16797	0.613017	1.57352
77	T+Pom	26.7	17.69	9.01	1.654	3.14705		1.654	3.14705		0.825878	0.600402		1.83274		1.14393
78	T+Pom	27.71	17.27	10.44	0.224	1.16797		0.224	1.16797				4.67187		0.770571	1.58447
79	T+Pom	27.45	17.66	9.79	0.874	1.83274		0.874	1.83274						0.541112
141	T+DP0.5	30.04	17.54	12.5	-1.836	0.280097		-1.836	0.280097
142	T+DP0.5	27.28	16.61	10.67	-0.006	0.99585		-0.006	0.99585				3.80527	2.27837	0.378404
143	T+DP0.5	29.72	17.97	11.75	-1.086	0.471066		-1.086	0.471066				4.95196	2.74727
144	T+DP0.5	28.94	17.57	11.37	-0.706	0.613017		-0.706	0.613017
145	T+DP0.5	27.28	17.33	9.95	0.714	1.64035		0.714	1.64035
191	T+DP0.5	28.14	17.1	11.04	-0.376	0.770571		-0.376	0.770571
192	T+DP0.5	28.49	16.94	11.55	-0.886	0.541112		-0.886	0.541112
183	T+DP0.1	26.35	17.55	8.8	1.864	3.64016		1.864	3.64016
184	T+DP0.1	26.55	17.81	8.74	1.924	3.79474		1.924	3.79474
185	T+DP0.1	26.13	16.96	9.17	1.494	2.81669		1.494	2.81669	IL-1beta	sham	sham+0.5DP	T+VE	T+Pom	T+0.5DP	T+0.1DP
186	T+DP0.1	27	16.99	10.01	0.654	1.57352		0.654	1.57352		1.0168	0.5119	3.59	1.168	0.2801	2.8167
187	T+DP0.1	27.75	17.28	10.47	0.194	1.14393		0.194	1.14393		1.0381	0.4979	4.6719	1.8327	0.4711	1.5735
188	T+DP0.1	28.05	18.05	10	0.664	1.58447		0.664	1.58447		0.8259	0.6004	3.8053	2.2784	0.613	1.1439
													4.952	2.7473	0.7706	1.5845
															0.5411
															0.3784

## Sheet: IL-1beta
								IL-1beta	sham	sham+0.1DP	T+VE	T+Pom	T+0.5DP	T+0.1DP
One Way Analysis of Variance	星期日, 九月 16, 2018, 下午 09:29:22								1.0168	0.5119	3.59	1.168	0.2801	2.8167
									1.0381	0.4979	4.6719	1.8327	0.4711	1.5735
Data source: Data 1 in Notebook1									0.8259	0.6004	3.8053	2.2784	0.613	1.1439
											4.952	2.7473	0.7706	1.5845
Normality Test:	Passed	(P = 0.083)											0.5411
													0.3784
Equal Variance Test:	Passed	(P = 0.162)							Col 2	Col 3	Col 4	Col 5	Col 6	Col 7
Group Name	N	Missing	Mean	Std Dev	SEM		Mean	SEM
Col 2	4	1	0.96	0.117	0.0675		1	0.0703125
Col 3	4	1	0.537	0.0556	0.0321		0.559375	0.0334375
Col 4	5	1	4.255	0.659	0.33		4.43229	0.34375
Col 5	5	1	2.007	0.672	0.336		2.09063	0.35
Col 6	7	1	0.509	0.174	0.071		0.530208	0.0739583
Col 7	5	1	1.78	0.721	0.361		1.85417	0.376042
Source of Variation	DF	SS	MS	F	P
Between Groups	5	40.671	8.134	33.24	<0.001
Residual	18	4.405	0.245
Total	23	45.076
The differences in the mean values among the treatment groups are greater than would be expected by chance; there is a statistically significant difference (P = <0.001).
Power of performed test with alpha = 0.050: 1.000
All Pairwise Multiple Comparison Procedures (Tukey Test):
Comparisons for factor:
Comparison	Diff of Means	p	q	P	P<0.050
Col 4 vs. Col 6	3.746	6	16.589	<0.001	Yes
Col 4 vs. Col 3	3.718	6	13.917	<0.001	Yes
Col 4 vs. Col 2	3.295	6	12.332	<0.001	Yes
Col 4 vs. Col 7	2.475	6	10.007	<0.001	Yes
Col 4 vs. Col 5	2.248	6	9.089	<0.001	Yes
Col 5 vs. Col 6	1.498	6	6.632	0.002	Yes
Col 5 vs. Col 3	1.47	6	5.502	0.012	Yes
Col 5 vs. Col 2	1.046	6	3.916	0.109	No
Col 5 vs. Col 7	0.227	6	0.917	0.985	Do Not Test
Col 7 vs. Col 6	1.271	6	5.627	0.01	Yes
Col 7 vs. Col 3	1.243	6	4.652	0.04	Yes
Col 7 vs. Col 2	0.819	6	3.067	0.299	Do Not Test
Col 2 vs. Col 6	0.451	6	1.824	0.787	No
Col 2 vs. Col 3	0.424	6	1.483	0.895	Do Not Test
Col 3 vs. Col 6	0.0277	6	0.112	1	Do Not Test
A result of "Do Not Test" occurs for a comparison when no significant difference is found between two means that enclose that comparison. For example, if you had four means sorted in order, and found no difference between means 4 vs. 2, then you would not test 4 vs. 3 and 3 vs. 2, but still test 4 vs. 1 and 3 vs. 1 (4 vs. 3 and 3 vs. 2 are enclosed by 4 vs. 2: 4 3 2 1). Note that not testing the …
