# Supplementary material for: 3,6’-dithiopomalidomide reduces neural loss, inflammation, behavioral deficits in brain injury and microglial activation
Source: eLife. 2020 Jun 26;9:e54726. doi: 10.7554/eLife.54726 (PMC7375814; doi:10.7554/eLife.54726)
Supplement: Figure 10—source data 4. [file elife-54726-fig10-data4.xlsx]

## Sheet: 工作表1
	IL-4	IL-4	IL-4
NO.	NO.	Name	Ct	actin CT	delta CT	(-ΔΔCt)	2^(-ΔΔCt)
	137	sh	32.26	13.75	18.51	-3.60667	0.082089	14.9033	2.22996
	138	sh	31.55	15.03	16.52	-1.61667	0.326088
	139	sh	28.23	14.96	13.27	1.63333	3.10229
	140	sh	29.35	15.3	14.05	0.853333	1.80667
	151	sh	28	15.49	12.51	2.39333	5.2537
	156	sh+Pom0.5	29.57	15.01	14.56	0.343333	1.26868
	157	sh+Pom0.5	29.65	15.92	13.73	1.17333	2.25532
	158	sh+Pom0.5	27.97	14.48	13.49	1.41333	2.66352
	159	sh+Pom0.5	28.39	15.14	13.25	1.65333	3.1456
	160	sh+Pom0.5	27.63	14.75	12.88	2.02333	4.06522
	166	sh+DP0.5	29.57	15.07	14.5	0.403333	1.32256
	167	sh+DP0.5	27.81	14.56	13.25	1.65333	3.1456
	168	sh+DP0.5	29.1	14.81	14.29	0.613333	1.52979
	169	sh+DP0.5	27.64	14.81	12.83	2.07333	4.20858
	170	sh+DP0.5	30.93	15.77	15.16	-0.256667	0.83702
	7	T+Veh	24.5	15.04	9.46	5.44333	43.5118
	131	T+Veh	23.47	13.76	9.71	5.19333	36.5889
	132	T+Veh	25.55	14.2	11.35	3.55333	11.7398
	134	T+Veh	22.19	12.41	9.78	5.12333	34.856
	171	T+Veh	22.84	13.35	9.49	5.41333	42.6163
	174	T+Veh	22.44	14.4	8.04	6.86333	116.431
	176	T+Veh	22.27	14.77	7.5	7.40333	169.288
	111	T+P0.5	30.66	15.31	15.35	-0.446667	0.733736
	110	T+P0.5	26.39	15.41	10.98	3.92333	15.1719
	77	T+P0.5	26.96	15.87	11.09	3.81333	14.0581
	78	T+P0.5	24.28	15.84	8.44	6.46333	88.2383
	79	T+P0.5	26.67	15.5	11.17	3.73333	13.2998
	177	T+P0.5	24.91	14.62	10.29	4.61333	24.4766
	178	T+P0.5	23.1	15.32	7.78	7.12333	139.424
	141	T+DP0.5	23.92	15.43	8.49	6.41333	85.2326
	142	T+DP0.5	25.02	14.49	10.53	4.37333	20.7255
	143	T+DP0.5	27.53	15.27	12.26	2.64333	6.24774
	191	T+DP0.5	26.84	14.68	12.16	2.74333	6.69616
	192	T+DP0.5	25.72	14.04	11.68	3.22333	9.33942
	194	T+DP0.5	23.82	13.99	9.83	5.07333	33.6686
