# Supplementary material for: 3,6’-dithiopomalidomide reduces neural loss, inflammation, behavioral deficits in brain injury and microglial activation
Source: eLife. 2020 Jun 26;9:e54726. doi: 10.7554/eLife.54726 (PMC7375814; doi:10.7554/eLife.54726)
Supplement: Figure 10—source data 5. [file elife-54726-fig10-data5.xlsx]

## Sheet: Arg2
Arg1	Arg1	Arg1
NO.	Name	Ct	Actin Ct	delta CT	(-ΔΔCt)	2^(-ΔΔCt)
137	sh	23.52	15.99	7.53	-0.1225	0.918594	7.4075	0.280749
138	sh	24.24	16.69	7.55	-0.1425	0.905948
139	sh	24.06	16.9	7.16	0.2475	1.18715
140	sh	24.99	17.6	7.39	0.0175	1.0122
146	sh+DP0.5	25.75	17.82	7.93	-0.5225	0.696164
147	sh+DP0.5	25.8	17.56	8.24	-0.8325	0.561555
148	sh+DP0.5	25.63	17.72	7.91	-0.5025	0.705883
149	sh+DP0.5	26.24	17.89	8.35	-0.9425	0.608247
7	T+Veh	25.07	17.28	7.79	-0.3825	0.767107
12	T+Veh	24.47	16.32	8.15	-0.7425	0.597703
19	T+Veh	25.26	17.82	7.44	-0.0325	0.977725
131	T+Veh	24.97	16.82	8.15	-0.7425	0.597703
133	T+Veh	25.37	16.73	8.64	-1.2325	0.425579
134	T+Veh	23.9	15.71	8.19	-0.7825	0.589531
135	T+Veh	24.85	15.44	9.41	-2.0025	0.249567
21	T+Pom	26.23	17.32	8.91	-1.5025	0.352941
111	T+Pom	27.6	18.59	9.01	-1.6025	0.329306
77	T+Pom	25.43	17.64	7.79	-0.3825	0.767107
78	T+Pom	26.71	17.39	9.32	-1.9125	0.499981
79	T+Pom	24.99	15.48	9.51	-2.1025	0.232854
141	T+DP0.5	26.81	17.14	9.67	-2.2625	0.208411
142	T+DP0.5	26.02	15.55	10.47	-3.0625	0.1197
143	T+DP0.5	25.82	17.65	8.17	-0.7625	0.589474
144	T+DP0.5	26.79	17.17	9.62	-2.2125	0.21576
145	T+DP0.5	25.78	17.68	8.1	-0.6925	0.618781
191	T+DP0.5	25.06	16.51	8.55	-1.1425	0.452974
192	T+DP0.5	24.4	16.01	8.39	-0.9825	0.506102
193	T+DP0.6	25.98	15.4	10.58	-3.1725	0.110913
194	T+DP0.7	25.18	16.97	8.21	-0.8025	0.573355
183	T+DP0.1	25.82	17.38	8.44	-1.0325	0.488862
184	T+DP0.1	24.93	16.97	7.96	-0.5525	0.58535
185	T+DP0.1	23.61	16.01	7.6	-0.1925	0.875088
186	T+DP0.1	25.68	16.55	9.13	-1.7225	0.303023
187	T+DP0.1	24.55	15.79	8.76	-1.3525	0.440238
188	T+DP0.1	25.45	16.2	9.25	-1.8425	0.480338
