# Supplementary material for: 3,6’-dithiopomalidomide reduces neural loss, inflammation, behavioral deficits in brain injury and microglial activation
Source: eLife. 2020 Jun 26;9:e54726. doi: 10.7554/eLife.54726 (PMC7375814; doi:10.7554/eLife.54726)
Supplement: Figure 10—source data 6. [file elife-54726-fig10-data6.xlsx]

## Sheet: 工作表1
IL-4	IL-4	IL-4
NO.	Name	Ct	Actin Ct	delta CT	(-ΔΔCt)	2^(-ΔΔCt)
137	sh	33.21	16.9	16.31	0.0533333	1.03766	16.3633	0.296367
138	sh	34.1	17.55	16.55	-0.186667	0.878633
139	sh	32.28	17.17	.	#VALUE!	#VALUE!
140	sh	31.87	17	.	#VALUE!	#VALUE!
151	sh	33.34	17.11	16.23	0.133333	1.09682
146	sh+DP0.5	34.26	17.37	16.89	-0.526667	0.694157
147	sh+DP0.5	33.46	17.19	16.27	0.0933333	1.06683
148	sh+DP0.5	33.71	18.02	15.69	0.673333	1.59475
149	sh+DP0.5	34.35	17.05	17.3	-0.936667	0.522439
150	sh+DP0.5	34.57	16.64	17.93	-1.56667	0.337587
7	T+Veh	37.18	17.6	19.58	-3.21667	0.107569
12	T+Veh	30.92	17.31	13.61	2.75333	6.74273
19	T+Veh	33.96	18.07	15.89	0.473333	1.38831
131	T+Veh	31.32	15.33	15.99	0.373333	1.29534
132	T+Veh	33.49	16.57	16.92	-0.556667	0.679871
134	T+Veh	31.97	17.5	14.47	1.89333	3.71493
135	T+Veh	31.62	15.64	15.98	0.383333	1.30435
21	T+Pom	34.49	18.56	15.93	0.433333	1.35035
110	T+Pom	31.04	15.14	15.9	0.463333	1.37872
77	T+Pom	31.56	16.36	15.2	1.16333	2.23974
78	T+Pom	31.53	16.88	14.65	1.71333	3.27918
79	T+Pom	30.09	15.61	14.48	1.88333	3.68926
141	T+DP0.5	31.58	16.56	15.02	1.34333	2.53737
142	T+DP0.5	31.61	16.28	15.33	1.03333	2.04675
143	T+DP0.5	32.3	17.67	14.63	1.73333	3.32495
144	T+DP0.5	34.31	17.62	16.69	-0.326667	0.797377
145	T+DP0.5	33.59	16.8	16.79	-0.426667	0.743979
191	T+DP0.5	36.79	19.55	17.24	-0.876667	0.544624
192	T+DP0.5	35.39	18.91	16.48	-0.116667	0.922316
183	T+DP0.1	33.44	17.16	16.28	0.0833333	1.05946
184	T+DP0.1	32.38	16.83	15.55	0.813333	1.75727
185	T+DP0.1	33.83	16.3	17.53	-1.16667	0.445449
186	T+DP0.1	31.64	16.91	14.73	1.63333	2.08088
187	T+DP0.1	32.58	16.65	15.93	0.433333	1.35035
188	T+DP0.1	32.68	17.38	15.3	1.06333	1.92351
