# Supplementary material for: 3,6’-dithiopomalidomide reduces neural loss, inflammation, behavioral deficits in brain injury and microglial activation
Source: eLife. 2020 Jun 26;9:e54726. doi: 10.7554/eLife.54726 (PMC7375814; doi:10.7554/eLife.54726)
Supplement: Figure 10—source data 7. [file elife-54726-fig10-data7.xlsx]

## Sheet: TNF-alpha
Nonlinear Regression			期日, 十月 06, 2019, 下午 09:05:46
R	Rsqr	Adj Rsqr	Standard Error of Estimate
0.9976	0.9951	0.9854		12.9084
						y=y0+ax+bx2					y=y0+ax+bx2
	Coefficient	Std. Error	t	P
y0	-6.1928	15.6848	-0.3948	0.7606
a	227.139	109.117	2.0816	0.2851
b	217.981	145.593	1.4972	0.3749
																20190731 protein extraction
	sample name	Absorbance	Push back concentration (pg/ml)-	Stock solution (pg/ml)	Protein concentration ug/ul	原液經電白質濃度校正(pg/mg)	Tissue correction(pg/mg tissue)	type	60X稀釋ug/ul	原液 ug/ul	加入 sample buffer後的蛋白質濃度(ug/ul)	protein loading 量(20μg)	30ug	50ug	100ug	No	sample	type	weight(g)	lysis 倍數	lysis buffer (ul)	體積	sample buffer	總體積(λ)
245	Sh24-15	0.0485	5.3362	10.6724	4.78224	2.23167	1.06617	LC											0.1001
246	Sh24-16	0.077	12.5893	25.1787	7.50138	3.35654	2.76385	LC											0.0911
247	Sh24-17	0.0785	12.9809	25.9618	7.31949	3.54693	2.83735	LC											0.0915
248	Sh24-18	0.0535	6.58306	13.1661	5.41496	2.43144	1.30229	LC											0.1011
249	Sh24-19	0.0575	7.5884	15.1768	5.95813	2.54724	1.41972	LC											0.1069
251	Sh24P5h5-12	0.063	8.98214	17.9643	6.77436	2.6518	1.90704	LC											0.0942
252	Sh24P5h5-13	0.069	10.5176	21.0352	5.86755	3.58501	2.07244	LC											0.1015
253	Sh24P5h5-14	0.0665	9.87592	19.7518	9.5993	2.05763	2.27556	LC											0.0868
254	Sh24P5h5-15	0.063	8.98214	17.9643	6.41138	2.80194	1.56483	LC											0.1148
255	Sh24P5h5-16	0.055	6.95925	13.9185	6.13936	2.26709	1.31431	LC											0.1059
257	Sh24DP5h5-11	0.045	4.46988	8.93975	13.1829	0.67813	0.886001	LC											0.1009
258	Sh24DP5h5-12	0.0595	8.09369	16.1874	9.5993	1.68631	1.70573	LC											0.0949
259	Sh24DP5h5-13	0.081	13.6356	27.2713	6.68358	4.08034	3.00676	LC											0.0907
260	Sh24DP5h5-14	0.05	5.70911	11.4182	6.50209	1.75609	1.05043	LC											0.1087
261	Sh24DP5h5-15	0.088	15.4835	30.967	9.23362	3.35372	2.73077	LC											0.1134
262	T24ve5h-33	0.0775	12.7197	25.4395	5.14366	4.94579	2.89743	LC											0.0878
263	T24ve5h-27	0.0775	12.7197	25.4395	7.77437	3.27222	3.02491	LC											0.0841
264	T24ve5h-28	0.0765	12.459	24.9181	6.32068	3.9423	3.18238	LC											0.0783
265	T24ve5h-29	0.0645	9.36453	18.7291	8.22979	2.27577	1.65597	LC											0.1131
266	T24Ve5h-30	0.0615	8.60072	17.2014	7.31949	2.35009	1.81259	LC											0.0949
267	T24Ve5h-31	0.0565	7.33641	14.6728	5.77699	2.53988	1.42041	LC											0.1033
270	T24P5h5-17	0.067	10.004	20.0081	8.41211	2.37849	2.59845	LC											0.077
271	T24P5h5-18	0.0585	7.84083	15.6817	6.48574	2.41787	1.72705	LC											0.0908
272	T24P5h5-19	0.059	7.9672	15.9344	7.81384	2.03925	1.93144	LC											0.0825
273	T24P5h5-20	0.051	5.95827	11.9165	9.63457	1.23685	1.44443	LC											0.0825
274	T24P5h5-21	0.0625	8.85489	17.7098	5.502	3.21879	1.60998	LC											0.11
275	T24DP5h5-12	0.0905	16.1486	32.2972	9.63457	3.35222	3.30576	LC											0.0977
277	T24DP5h5-14	0.078	12.8503	25.7005	6.73682	3.81493	2.67714	LC											0.096
278	T24DP5h5-15	0.055	6.95925	13.9185	7.97067	1.74621	1.59433	LC											0.0873
279	T24DP5h5-16	0.049	5.46039	10.9208	8.49876	1.28499	1.08881	LC											0.1003
280	T24DP5h5-17	0.0665	9.87592	19.7518	9.0351	2.18612	1.87221	LC											0.1055
282	MT24Ve5h-1	0.085	14.6889	29.3779	9.08918	3.23218	3.21773	LC											0.0913
283	MT24Ve5h-2	0.087	15.2182	30.4364	8.44558	3.60383	3.31191	LC											0.0919
284	MT24Ve5h-3	0.0665	9.87592	19.7518	6.83783	2.88861	1.53591	LC											0.1286
285	MT24Ve5h-4	0.0955	17.487	34.9741	9.0351	3.87091	2.96139	LC											0.1181
286	MT24Ve5h-6	0.083	14.1614	28.3228	9.1976	3.07937	2.77403	LC											0.1021
287	MT24Ve5h-7	0.0795	13.2425	26.4849	6.98996	3.78899	2.27534	LC											0.1164
291	MT24DP5h5-3	0.0805	13.5045	27.009	8.7659	3.08114	2.59452	LC											0.1041
292	MT24DP5h5-4	0.086	14.9534	29.9067	7.4508	4.01389	2.53018	LC											0.1182
293	MT24DP5h5-5	0.0575	7.5884	15.1768	8.12823	1.86717	1.54079	LC											0.0985
294	MT24DP5h5-6	0.057	7.46235	14.9247	7.39927	2.01705	1.30233	LC											0.1146
295	MT24DP5h5-7	0.0725	11.4206	22.8411	6.93917	3.29162	1.99486	LC											0.1145

## Sheet: analyze
One Way Analysis of Variance	星期三, 五月 06, 2020, 下午 03:16:38
Data source: Data 2 in TNF-alpha-ELISA-Analysis.JNB									TNF- alpha	sham	sham+0.5DP	T+VE	T+Pom	T+0.5DP
										Col 16	Col 17	Col 18	Col 19	Col 20
Normality Test (Shapiro-Wilk):	Passed	(P = 0.517)								1.06617	0.886001	2.89743	2.59845	1.59433
										1.30229	1.70573	3.02491	1.72705	1.08881
Equal Variance Test (Brown-Forsythe):	Passed	(P = 0.598)								1.41972	1.05043	3.18238	1.93144	1.87221
Group Name	N	Missing	Mean	Std Dev	SEM
Col 16	3	0	1.263	0.18	0.104
Col 17	3	0	1.214	0.434	0.25
Col 18	3	0	3.035	0.143	0.0824
Col 19	3	0	2.086	0.456	0.263
Col 20	3	0	1.518	0.397	0.229
Source of Variation	DF	SS	MS	F	P
Between Groups	4	6.946	1.736	14.32	<0.001
Residual	10	1.213	0.121
Total	14	8.158
The differences in the mean values among the treatment groups are greater than would be expected by chance; there is a statistically significant difference (P = <0.001).
Power of performed test with alpha = 0.050: 0.998
All Pairwise Multiple Comparison Procedures (Tukey Test):
Comparisons for factor:
Comparison	Diff of Means	p	q	P	P<0.050
Col 18 vs. Col 17	1.821	5	9.057	<0.001	Yes
Col 18 vs. Col 16	1.772	5	8.815	<0.001	Yes
Col 18 vs. Col 20	1.516	5	7.543	0.002	Yes
Col 18 vs. Col 19	0.949	5	4.722	0.047	Yes
Col 19 vs. Col 17	0.872	5	4.335	0.071	No
Col 19 vs. Col 16	0.823	5	4.093	0.092	Do Not Test
Col 19 vs. Col 20	0.567	5	2.821	0.334	Do Not Test
Col 20 vs. Col 17	0.304	5	1.514	0.817	Do Not Test
Col 20 vs. Col 16	0.256	5	1.272	0.891	Do Not Test
Col 16 vs. Col 17	0.0487	5	0.242	1	Do Not Test
A result of "Do Not Test" occurs for a comparison when no significant difference is found between two means that enclose that comparison. For example, if you had four means sorted in order, and found no difference between means 4 vs. 2, then you would not test 4 vs. 3 and 3 vs. 2, but still test 4 vs. 1 and 3 vs. 1 (4 vs. 3 and 3 vs. 2 are enclosed by 4 vs. 2: 4 3 2 1). Note that not testing the …
