# Supplementary material for: 3,6’-dithiopomalidomide reduces neural loss, inflammation, behavioral deficits in brain injury and microglial activation
Source: eLife. 2020 Jun 26;9:e54726. doi: 10.7554/eLife.54726 (PMC7375814; doi:10.7554/eLife.54726)
Supplement: Figure 10—source data 8. [file elife-54726-fig10-data8.xlsx]

## Sheet: IL-6
Nonlinear Regression			星期二, 十月 08, 2019, 下午 03:04:52
R	Rsqr	Adj Rsqr	Standard Error of Estimate
0.9989	0.9979	0.9965		44.1222
						y=y0+ax+bx2					y=y0+ax+bx2
	Coefficient	Std. Error	t	P
y0	-78.401	39.554	-1.9821	0.1418
a	1737.98	177.876	9.7707	0.0023
b	-116.1	124.064	-0.9358	0.4184
																20190731 protein extraction
	sample name	Absorbance	Push back concentration (pg/ml)-	Stock solution (pg/ml)	Protein concentration ug/ul	原液經電白質濃度校正(pg/mg)	Tissue correction(pg/mg tissue)	type	60X稀釋ug/ul	原液 ug/ul	加入 sample buffer後的蛋白質濃度(ug/ul)	protein loading 量(20μg)	30ug	50ug	100ug	No	sample	type	weight(g)	lysis 倍數	lysis buffer (ul)	體積	sample buffer	總體積(λ)
151	Sh24-10	0.147	174.573	349.147	10.9083	32.0074	1.08541	LC											0.1005
152	Sh24-11	0.1315	148.136	296.272	14.6304	20.2505	1.42042	LC											0.103
155	Sh24-14	0.179	228.978	457.956	19.568	23.4033	2.19865	LC											0.089
198	sh7d-1	0.178	227.281	454.562	15.9738	28.4567	1.58943	LC											0.1005
199	sh7d-2	0.1695	212.851	425.703	17.1088	24.8821	1.66105	LC											0.103
200	sh7d-3	0.13	145.575	291.149	29.6505	9.81937	3.56805	LC											0.0831
247	Sh24-17	0.157	191.6	383.201	7.31949	52.3534	0.799945	LC											0.0915
248	Sh24-18	0.15	179.684	359.368	5.41496	66.3658	0.535604	LC											0.1011
249	Sh24-19	0.133	150.697	301.394	5.95813	50.5853	0.557356	LC											0.1069
251	Sh24P5h5-12	0.1535	185.644	371.287	6.77436	54.8077	0.719147	LC											0.0942
252	Sh24P5h5-13	0.196	257.783	515.567	5.86755	87.8675	0.578084	LC											0.1015
253	Sh24P5h5-14	0.1425	166.904	333.808	9.5993	34.7742	1.10591	LC											0.0868
254	Sh24P5h5-15	0.1025	98.5223	197.045	6.41138	30.7336	0.558482	LC											0.1148
255	Sh24P5h5-16	0.111	113.084	226.169	6.13936	36.8392	0.579732	LC											0.1059
257	Sh24DP5h5-11	0.1085	108.803	217.607	13.1829	16.5067	1.30654	LC											0.1009
258	Sh24DP5h5-12	0.1735	219.644	439.288	9.5993	45.7625	1.01152	LC											0.0949
259	Sh24DP5h5-13	0.324	472.517	945.035	6.68358	141.396	0.736889	LC											0.0907
260	Sh24DP5h5-14	0.115	119.931	239.863	6.50209	36.8901	0.598168	LC											0.1087
261	Sh24DP5h5-15	0.1355	154.964	309.928	9.23362	33.5651	0.814252	LC											0.1134
262	T24ve5h-33	0.1835	236.609	473.219	5.14366	92.0003	0.585839	LC											0.0878
263	T24ve5h-27	0.1525	183.941	367.882	7.77437	47.3199	0.92442	LC											0.0841
264	T24ve5h-28	0.196	257.783	515.567	6.32068	81.5682	0.807239	LC											0.0783
267	T24Ve5h-31	0.1625	200.955	401.911	5.77699	69.571	0.559244	LC											0.1033
235	T24Ve5h-23	0.1505	180.536	361.071	11.4678	31.4857	1.5393	LC											0.0745
236	T24Ve5h-24	0.1065	105.377	210.754	13.8337	15.2349	1.77355	LC											0.078
237	T24Ve5h-25	0.122	131.905	263.809	14.5358	18.149	2.40658	LC											0.0604
238	T24Ve5h-26	0.1665	207.754	415.509	10.2597	40.4993	1.17792	LC											0.0871
171	T24ve5h-17	0.1325	149.843	299.687	11.0553	27.1078	1.38192	LC											0.08
269	T24P5h5-16	0.262	368.981	737.961	5.14366	143.47	0.668008	LC											0.077
270	T24P5h5-17	0.2085	278.921	557.842	8.41211	66.3142	0.926444	LC											0.0908
271	T24P5h5-18	0.195	256.091	512.181	6.48574	78.9704	0.78615	LC											0.0825
272	T24P5h5-19	0.18	230.674	461.348	7.81384	59.0424	0.947132	LC											0.0825
273	T24P5h5-20	0.142	166.051	332.103	9.63457	34.4699	0.87587	LC											0.11
274	T24P5h5-21	0.1365	156.67	313.341	5.502	56.9503	0.500182	LC											0.11
182	T24P5h5-15	0.1695	212.851	425.703	18.0094	23.6378	1.79735	LC											0.1002
275	T24DP5h5-12	0.213	286.522	573.043	9.63457	59.4778	0.986138	LC											0.0977
276	T24DP5h5-13	0.2065	275.541	551.083	7.50242	73.454	1.07948	LC											0.0695
277	T24DP5h5-14	0.184	237.457	474.914	6.73682	70.4952	0.701752	LC											0.096
278	T24DP5h5-15	0.1355	154.964	309.928	7.97067	38.8835	0.91302	LC											0.0873
279	T24DP5h5-16	0.175	222.19	444.38	8.49876	52.2877	0.847334	LC											0.1003
280	T24DP5h5-17	0.173	218.795	437.59	9.0351	48.4323	0.856407	LC											0.1055
190	T24DP5h5-7	0.163	201.805	403.611	13.5285	29.8341	1.50317	LC											0.09

## Sheet: analyze
One Way Analysis of Variance	星期三, 五月 06, 2020, 下午 03:05:48
Data source: Data 2 in 20191007 IL-6-ELISA-Analysis.JNB									IL-6	sham	sham+0.5DP	T+VE	T+Pom	T+0.5DP
										Col 16	Col 17	Col 18	Col 19	Col 20
Normality Test (Shapiro-Wilk):	Passed	(P = 0.732)								0.799945	0.736889	1.5393	0.926444	0.701752
										0.535604	0.598168	1.77355	0.947132	0.847334
Equal Variance Test (Brown-Forsythe):	Passed	(P = 0.579)								0.557356	0.814252	1.17792	0.87587	0.856407
												1.38192
Group Name	N	Missing	Mean	Std Dev	SEM
Col 16	3	0	0.631	0.147	0.0847
Col 17	3	0	0.716	0.109	0.0632
Col 18	4	0	1.468	0.252	0.126
Col 19	3	0	0.916	0.0367	0.0212
Col 20	3	0	0.802	0.0868	0.0501
Source of Variation	DF	SS	MS	F	P
Between Groups	4	1.611	0.403	16.124	<0.001
Residual	11	0.275	0.025
Total	15	1.886
The differences in the mean values among the treatment groups are greater than would be expected by chance; there is a statistically significant difference (P = <0.001).
Power of performed test with alpha = 0.050: 1.000
All Pairwise Multiple Comparison Procedures (Tukey Test):
Comparisons for factor:
Comparison	Diff of Means	p	q	P	P<0.050
Col 18 vs. Col 16	0.837	5	9.808	<0.001	Yes
Col 18 vs. Col 17	0.752	5	8.807	<0.001	Yes
Col 18 vs. Col 20	0.666	5	7.806	0.001	Yes
Col 18 vs. Col 19	0.552	5	6.463	0.006	Yes
Col 19 vs. Col 16	0.286	5	3.129	0.244	No
Col 19 vs. Col 17	0.2	5	2.192	0.554	Do Not Test
Col 19 vs. Col 20	0.115	5	1.256	0.895	Do Not Test
Col 20 vs. Col 16	0.171	5	1.872	0.683	Do Not Test
Col 20 vs. Col 17	0.0854	5	0.936	0.961	Do Not Test
Col 17 vs. Col 16	0.0855	5	0.937	0.961	Do Not Test
A result of "Do Not Test" occurs for a comparison when no significant difference is found between two means that enclose that comparison. For example, if you had four means sorted in order, and found no difference between means 4 vs. 2, then you would not test 4 vs. 3 and 3 vs. 2, but still test 4 vs. 1 and 3 vs. 1 (4 vs. 3 and 3 vs. 2 are enclosed by 4 vs. 2: 4 3 2 1). Note that not testing the …
