# Supplementary material for: 3,6’-dithiopomalidomide reduces neural loss, inflammation, behavioral deficits in brain injury and microglial activation
Source: eLife. 2020 Jun 26;9:e54726. doi: 10.7554/eLife.54726 (PMC7375814; doi:10.7554/eLife.54726)
Supplement: Figure 10—source data 9. [file elife-54726-fig10-data9.xlsx]

## Sheet: IL-1 beta
Nonlinear Regression			星期三, 十月 09, 2019, 下午 04:00:49
R	Rsqr	Adj Rsqr	Standard Error of Estimate
0.9948	0.9896	0.9827		49.382			y=y0+ax+bx2					y=y0+ax+bx2
	Coefficient	Std. Error	t	P
y0	20.8715	45.6811	0.4569	0.6788
a	62.8506	73.9461	0.85	0.4578
b	63.1573	20.3495	3.1036	0.0531													20190731 protein extraction
	sample name	吸光值	回推濃度(pg/ml)-2X稀釋	原液 (pg/ml)	原液蛋白質濃度 ug/ul	原液蛋白質濃度 ug/ml	原液經電白質濃度校正(pg/mg)	原液經組織校正(pg/mg tissue)	type	60X稀釋ug/ul	原液 ug/ul	加入 sample buffer後的蛋白質濃度(ug/ul)	protein loading 量(20μg)	30ug	50ug	100ug	No	sample	type	weight(g)	lysis 倍數	lysis buffer (ul)	體積	sample buffer	總體積(λ)
245	Sh24-15	0.1785	5.72812	11.4562	4.78224	47.8224	2.39558	1.14448	LC											0.1001
246	Sh24-16	0.1815	5.85862	11.7172	9.50138	95.0138	1.23321	1.28619	LC											0.0911
247	Sh24-17	0.162	5.03063	10.0613	10.3195	103.195	0.974977	1.09959	LC											0.0915
248	Sh24-18	0.1605	4.96892	9.93785	5.41496	54.1496	1.83526	0.982972	LC											0.1011
249	Sh24-19	0.155	4.74507	9.49014	5.95813	59.5813	1.5928	0.887758	LC											0.1069
251	Sh24P5h5-12	0.1765	5.64176	11.2835	6.77436	67.7436	1.66562	1.19783	LC											0.0942
252	Sh24P5h5-13	0.1475	4.44594	8.89188	5.86755	58.6755	1.51543	0.876047	LC											0.1015
253	Sh24P5h5-14	0.15	4.54486	9.08973	9.5993	95.993	0.946915	1.0472	LC											0.0868
254	Sh24P5h5-15	0.1645	5.13411	10.2682	6.41138	64.1138	1.60156	0.894445	LC											0.1148
255	Sh24P5h5-16	0.1475	4.44594	8.89188	6.13936	61.3936	1.44834	0.839649	LC											0.1059
257	Sh24DP5h5-11	0.1565	4.80574	9.61148	13.1829	131.829	0.729085	0.952575	LC											0.1009
258	Sh24DP5h5-12	0.1885	6.1675	12.335	9.5993	95.993	1.28499	1.29979	LC											0.0949
259	Sh24DP5h5-13	0.309	12.4503	12.4503	6.68358	66.8358	1.86282	1.37269	LC											0.0907
260	Sh24DP5h5-14	0.144	4.30877	8.61753	6.50209	65.0209	1.32535	0.792781	LC											0.1087
261	Sh24DP5h5-15	0.167	5.23838	10.4768	7.23362	72.3362	1.44834	0.923877	LC											0.1134
262	T24ve5h-33	0.252	9.25088	18.5018	5.14366	51.4366	3.597	2.10726	LC											0.0878
263	T24ve5h-27	0.214	7.34481	14.6896	7.77437	77.7437	1.88949	1.74668	LC											0.0841
264	T24ve5h-28	0.205	6.91995	13.8399	6.32068	63.2068	2.18962	1.76755	LC											0.0783
265	T24ve5h-29	0.199	6.64238	13.2848	8.22979	82.2979	1.61423	1.1746	LC											0.1131
266	T24Ve5h-30	0.232	8.22506	16.4501	7.31949	73.1949	2.24744	1.73342	LC											0.0949
267	T24Ve5h-31	0.18	5.79323	11.5865	5.77699	57.7699	2.00562	1.12163	LC											0.1033
270	T24P5h5-17	0.192	6.32425	12.6485	8.41211	84.1211	1.50361	1.64266	LC											0.077
271	T24P5h5-18	0.1685	5.30132	10.6026	6.48574	64.8574	1.63476	1.16769	LC											0.0908
272	T24P5h5-19	0.1805	5.81499	11.63	7.81384	78.1384	1.48838	1.4097	LC											0.0825
273	T24P5h5-20	0.172	5.44927	10.8985	9.63457	96.3457	1.13119	1.32104	LC											0.0825
274	T24P5h5-21	0.254	9.35623	18.7125	5.502	55.02	3.40103	1.70113	LC											0.11
275	T24DP5h5-12	0.2235	7.80431	15.6086	9.63457	96.3457	1.62006	1.59761	LC											0.0977
277	T24DP5h5-14	0.2175	7.51278	15.0256	6.73682	67.3682	2.23036	1.56516	LC											0.096
278	T24DP5h5-15	0.1795	5.7715	11.543	7.97067	79.7067	1.44818	1.32222	LC											0.0873
279	T24DP5h5-16	0.17	5.36454	10.7291	8.49876	84.9876	1.26243	1.0697	LC											0.1003
280	T24DP5h5-17	0.184	5.96823	11.9365	9.0351	90.351	1.32112	1.13142	LC											0.1055
282	MT24Ve5h-1	0.1935	6.3919	12.7838	9.08918	90.8918	1.40649	1.4002	LC											0.0913
283	MT24Ve5h-2	0.2265	7.95177	15.9035	8.44558	84.4558	1.88306	1.73053	LC											0.0919
284	MT24Ve5h-3	0.19	6.23449	12.469	6.83783	68.3783	1.82353	0.969594	LC											0.1286
285	MT24Ve5h-4	0.256	9.46208	18.9242	9.0351	90.351	2.09452	1.60238	LC											0.1181
286	MT24Ve5h-6	0.3485	14.9071	29.8141	9.1976	91.976	3.24151	2.92009	LC											0.1021
287	MT24Ve5h-7	0.278	10.6596	21.3192	6.98996	69.8996	3.04998	1.83155	LC											0.1164
291	MT24DP5h5-3	0.322	13.2372	26.4744	8.7659	87.659	3.02016	2.54317	LC											0.1041
292	MT24DP5h5-4	0.477	24.256	48.5121	7.4508	74.508	6.51099	4.10424	LC											0.1182
293	MT24DP5h5-5	0.176	5.62024	11.2405	8.12823	81.2823	1.38289	1.14117	LC											0.0985
294	MT24DP5h5-6	0.1615	5.01003	10.0201	7.39927	73.9927	1.3542	0.874351	LC											0.1146
295	MT24DP5h5-7	0.2235	7.80431	15.6086	6.93917	69.3917	2.24935	1.3632	LC											0.1145

## Sheet: analyze
One Way Analysis of Variance	星期三, 五月 06, 2020, 下午 03:12:25
Data source: Data 4 in 20191007 IL1-beta-ELISA-Analysis.JNB
										IL-1 beta	sham	sham+0.5DP	T+VE	T+Pom	T+0.5DP
Normality Test (Shapiro-Wilk):	Passed	(P = 0.628)									Col 16	Col 17	Col 18	Col 19	Col 20
											1.09959	0.952575	1.74668	1.16769	1.32222
Equal Variance Test (Brown-Forsythe):	Passed	(P = 0.398)									0.982972	0.792781	1.76755	1.4097	1.0697
											0.887758	0.923877	1.73342	1.32104	1.13142
Group Name	N	Missing	Mean	Std Dev	SEM
Col 16	3	0	0.99	0.106	0.0613
Col 17	3	0	0.89	0.0852	0.0492
Col 18	3	0	1.749	0.0172	0.00993
Col 19	3	0	1.299	0.122	0.0707
Col 20	3	0	1.174	0.132	0.076
Source of Variation	DF	SS	MS	F	P
Between Groups	4	1.351	0.338	33.031	<0.001
Residual	10	0.102	0.0102
Total	14	1.453
The differences in the mean values among the treatment groups are greater than would be expected by chance; there is a statistically significant difference (P = <0.001).
Power of performed test with alpha = 0.050: 1.000
All Pairwise Multiple Comparison Procedures (Tukey Test):
Comparisons for factor:
Comparison	Diff of Means	p	q	P	P<0.050
Col 18 vs. Col 17	0.859	5	14.721	<0.001	Yes
Col 18 vs. Col 16	0.759	5	13.002	<0.001	Yes
Col 18 vs. Col 20	0.575	5	9.845	<0.001	Yes
Col 18 vs. Col 19	0.45	5	7.703	0.002	Yes
Col 19 vs. Col 17	0.41	5	7.018	0.004	Yes
Col 19 vs. Col 16	0.309	5	5.299	0.025	Yes
Col 19 vs. Col 20	0.125	5	2.141	0.577	No
Col 20 vs. Col 17	0.285	5	4.876	0.039	Yes
Col 20 vs. Col 16	0.184	5	3.157	0.243	No
Col 16 vs. Col 17	0.1	5	1.719	0.744	No
