# Supplementary material for: 3,6’-dithiopomalidomide reduces neural loss, inflammation, behavioral deficits in brain injury and microglial activation
Source: eLife. 2020 Jun 26;9:e54726. doi: 10.7554/eLife.54726 (PMC7375814; doi:10.7554/eLife.54726)
Supplement: Figure 11—source data 1. [file elife-54726-fig11-data1.xlsx]

## Sheet: 1211
Inos
NO.	Name	Ct	actin CT	delta CT	(-ΔΔCt)	2^(-ΔΔCt)				i-NOS	sham	sham+0.5DP	T+VE	T+Pom	T+0.5DP	T+0.1DP
137	sh	31.53	15.96	15.57	-0.423333	0.7457	15.1467	-0.423333	0.7457		0.7457	0.761368	10.8278	1.78592	0.950439	4.68051
138	sh	33.96	16.46	17.5	-2.35333	0.195693		-2.35333	0.195693		0.195693	1.51222	39.5791	0.631418	2.56093	8.6139
139	sh	34	16.17	17.83	-2.68333	0.155681		-2.68333	0.155681		0.155681	0.710382	27.4107	6.57352	3.30962	10.9031
140	sh	30.11	15.26	14.85	0.296667	1.2283		0.296667	1.2283		1.2283	4.33691	4.36707	1.0693	1.90088	4.68051
151	sh	30.44	15.42	15.02	0.126667	1.09177		0.126667	1.09177		1.09177	1.9816	2.24492	4.07462	1.15402	3.37916
146	shDP	30.67	15.13	15.54	-0.393333	0.761368		-0.393333	0.761368				5.22948		2.34026	6.85267
147	shDP	29.79	15.24	14.55	0.596667	1.51222		0.596667	1.51222				4.94739		0.844791
148	shDP	31.71	16.07	15.64	-0.493333	0.710382		-0.493333	0.710382
149	shDP	29.75	16.72	13.03	2.11667	4.33691		2.11667	4.33691		1.87384	0.388504	6.39082	0.827023	1.65405
150	shDP	30.12	15.96	14.16	0.986667	1.9816		0.986667	1.9816		1.46003	1.33422	4.9795	103.68	2.35545
7	TBI+VEH	27.97	16.26	11.71	3.43667	10.8278		3.43667	10.8278		0.527046	0.304814	6.5251	0.657927	0.827023
12	TBI+VEH	25.91	16.07	9.84	5.30667	39.5791		5.30667	39.5791		0.990343	2.00834	30.4	1.13761	1.25353
19	TBI+VEH	26.09	15.72	10.37	4.77667	27.4107		4.77667	27.4107		0.700278	0.419284	18.2017	3.74769	0.324435
131	TBI+VEH	27.49	14.47	13.02	2.12667	4.36707		2.12667	4.36707				10.0283	0.667112
132	TBI+VEH	28.94	14.96	13.98	1.16667	2.24492		1.16667	2.24492				1.11419	1.14552
134	TBI+VEH	28.46	15.7	12.76	2.38667	5.22948		2.38667	5.22948				0.969962
135	TBI+VEH	27.3	14.46	12.84	2.30667	4.94739		2.30667	4.94739				2.19771
21	T+Pom	31.62	17.31	14.31	0.836667	1.78592		0.836667	1.78592				2.29104
110	T+Pom	31.1	15.29	15.81	-0.663333	0.631418		-0.663333	0.631418				7.97785
77	T+Pom	28.26	15.83	12.43	2.71667	6.57352		2.71667	6.57352
78	T+Pom	29.52	14.47	15.05	0.0966667	1.0693		0.0966667	1.0693	i-NOS	sham	sham+0.5DP	T+VE	T+Pom	T+0.5DP	T+0.1DP
79	T+Pom	28.73	15.61	13.12	2.02667	4.07462		2.02667	4.07462		0.7457	0.761368	10.8278	1.78592	0.950439	4.68051
141	T+DP0.5	30.45	15.23	15.22	-0.0733333	0.950439		-0.0733333	0.950439						2.56093
142	T+DP0.5	28.64	14.85	13.79	1.35667	2.56093		1.35667	2.56093			0.710382		6.57352
143	T+DP0.5	29.21	15.79	13.42	1.72667	3.30962		1.72667	3.30962		1.2283		4.36707	1.0693	1.90088	4.68051
144	T+DP0.5	28.81	14.59	14.22	0.926667	1.90088		0.926667	1.90088		1.09177			4.07462	1.15402	3.37916
145	T+DP0.5	30.02	15.08	14.94	0.206667	1.15402		0.206667	1.15402				5.22948		2.34026
191	T+DP0.5	28.8	14.88	13.92	1.22667	2.34026		1.22667	2.34026				4.94739		0.844791
192	T+DP0.5	30.23	14.84	15.39	-0.243333	0.844791		-0.243333	0.844791
183	T+DP0.1	28.08	15.16	12.92	2.22667	4.68051		2.22667	4.68051			0.388504	6.39082
184	T+DP0.1	26.91	14.87	12.04	3.10667	8.6139		3.10667	8.6139				4.9795
185	T+DP0.1	26.03	14.33	11.7	3.44667	10.9031		3.44667	10.9031		0.527046	0.304814	6.5251		0.827023
186	T+DP0.1	27.95	15.03	12.92	2.22667	4.68051		2.22667	4.68051		0.990343			1.13761	1.25353
187	T+DP0.1	27.48	14.09	13.39	1.75667	3.37916		1.75667	3.37916		0.700278	0.419284		3.74769	0.324435
188	T+DP0.1	27.92	15.55	12.37	2.77667	6.85267		2.77667	6.85267				10.0283
														1.14552
													7.97785

## Sheet: iNOS
								i-NOS	sham	sham+0.5DP	T+VE	T+Pom	T+0.5DP	T+0.1DP
One Way Analysis of Variance	星期二, 十二月 11, 2018, 下午 04:53:45								0.7457	0.3885	5.2295	1.0693	0.9504	4.6805
									0.527	0.3048	4.9474	1.1376	1.154	4.6805
Data source: Data 1 in Notebook1									0.7003	0.4193	6.3908	1.1455	0.8448	3.3792
											4.9795	1.1455	0.827
Normality Test:	Passed	(P = 0.058)									6.5251		1.2535
Equal Variance Test:	Passed	(P = 0.134)
									Col 1	Col 2	Col 3	Col 4	Col 5	Col 6
Group Name	N	Missing	Mean	Std Dev	SEM		Mean	SEM
Col 1	3	0	0.658	0.115	0.0666		1	0.101216
Col 2	3	0	0.371	0.0592	0.0342		0.56383	0.0519757
Col 3	5	0	5.614	0.779	0.348	T+Veh v.s. sham	8.53191	0.528875		TBI+Veh V.S. Sham	7.53191
Col 4	4	0	1.124	0.037	0.0185		1.70821	0.0281155		TBI+Pom(0.5) V.S. Sham	0.708207	90.5973	TBI+Pom(0.5) V.S. TBI+Veh
Col 5	5	0	1.006	0.19	0.0849		1.52888	0.129027		TBI+DP(0.5) V.S. Sham	0.528875	92.9782	TBI+DP(0.5) V.S. TBI+Veh
Col 6	3	0	4.247	0.751	0.434		6.45441	0.659574		TBI+DP(0.1) V.S. Sham	5.45441	27.5827	TBI+DP(0.1) V.S. TBI+Veh
Source of Variation	DF	SS	MS	F	P
Between Groups	5	99.442	19.888	90.416	<0.001
Residual	17	3.739	0.22
Total	22	103.181
The differences in the mean values among the treatment groups are greater than would be expected by chance; there is a statistically significant difference (P = <0.001).
Power of performed test with alpha = 0.050: 1.000
All Pairwise Multiple Comparison Procedures (Tukey Test):
Comparisons for factor:
Comparison	Diff of Means	p	q	P	P<0.050
Col 3 vs. Col 2	5.244	6	21.65	<0.001	Yes
Col 3 vs. Col 1	4.957	6	20.466	<0.001	Yes
Col 3 vs. Col 5	4.608	6	21.972	<0.001	Yes
Col 3 vs. Col 4	4.49	6	20.182	<0.001	Yes
Col 3 vs. Col 6	1.368	6	5.647	0.01	Yes
Col 6 vs. Col 2	3.876	6	14.314	<0.001	Yes
Col 6 vs. Col 1	3.589	6	13.255	<0.001	Yes
Col 6 vs. Col 5	3.241	6	13.381	<0.001	Yes
Col 6 vs. Col 4	3.122	6	12.327	<0.001	Yes
Col 4 vs. Col 2	0.754	6	2.975	0.331	No
Col 4 vs. Col 1	0.467	6	1.843	0.78	Do Not Test
Col 4 vs. Col 5	0.119	6	0.533	0.999	Do Not Test
Col 5 vs. Col 2	0.635	6	2.622	0.46	Do Not Test
Col 5 vs. Col 1	0.348	6	1.438	0.906	Do Not Test
Col 1 vs. Col 2	0.287	6	1.059	0.973	Do Not Test
A result of "Do Not Test" occurs for a comparison when no significant difference is found between two means that enclose that comparison. For example, if you had four means sorted in order, and found no difference between means 4 vs. 2, then you would not test 4 vs. 3 and 3 vs. 2, but still test 4 vs. 1 and 3 vs. 1 (4 vs. 3 and 3 vs. 2 are enclosed by 4 vs. 2: 4 3 2 1). Note that not testing the …

## Sheet: Figure 11 (xi)-iNOS (mRNA)
								i-NOS	sham	sham+0.5DP	T+VE	T+Pom	T+0.5DP	T+0.1DP
One Way Analysis of Variance	星期二, 十二月 11, 2018, 下午 04:53:45								0.7457	0.3885	5.2295	1.0693	0.9504	4.6805
									0.527	0.3048	4.9474	1.1376	1.154	4.6805
Data source: Data 1 in Notebook1									0.7003	0.4193	6.3908	1.1455	0.8448	3.3792
											4.9795	1.1455	0.827
Normality Test:	Passed	(P = 0.058)									6.5251		1.2535
Equal Variance Test:	Passed	(P = 0.134)
									Col 1	Col 2	Col 3	Col 4	Col 5	Col 6
Group Name	N	Missing	Mean	Std Dev	SEM		Mean	SEM
Col 1	3	0	0.658	0.115	0.0666		1	0.101216
Col 2	3	0	0.371	0.0592	0.0342		0.56383	0.0519757
Col 3	5	0	5.614	0.779	0.348	T+Veh v.s. sham	8.53191	0.528875		TBI+Veh V.S. Sham	7.53191
Col 4	4	0	1.124	0.037	0.0185		1.70821	0.0281155		TBI+Pom(0.5) V.S. Sham	0.708207	90.5973	TBI+Pom(0.5) V.S. TBI+Veh
Col 5	5	0	1.006	0.19	0.0849		1.52888	0.129027		TBI+DP(0.5) V.S. Sham	0.528875	92.9782	TBI+DP(0.5) V.S. TBI+Veh
Col 6	3	0	4.247	0.751	0.434		6.45441	0.659574		TBI+DP(0.1) V.S. Sham	5.45441	27.5827	TBI+DP(0.1) V.S. TBI+Veh
Source of Variation	DF	SS	MS	F	P
Between Groups	5	99.442	19.888	90.416	<0.001
Residual	17	3.739	0.22
Total	22	103.181
The differences in the mean values among the treatment groups are greater than would be expected by chance; there is a statistically significant difference (P = <0.001).
Power of performed test with alpha = 0.050: 1.000
All Pairwise Multiple Comparison Procedures (Tukey Test):
Comparisons for factor:
Comparison	Diff of Means	p	q	P	P<0.050
Col 3 vs. Col 2	5.244	6	21.65	<0.001	Yes
Col 3 vs. Col 1	4.957	6	20.466	<0.001	Yes
Col 3 vs. Col 5	4.608	6	21.972	<0.001	Yes
Col 3 vs. Col 4	4.49	6	20.182	<0.001	Yes
Col 3 vs. Col 6	1.368	6	5.647	0.01	Yes
Col 6 vs. Col 2	3.876	6	14.314	<0.001	Yes
Col 6 vs. Col 1	3.589	6	13.255	<0.001	Yes
Col 6 vs. Col 5	3.241	6	13.381	<0.001	Yes
Col 6 vs. Col 4	3.122	6	12.327	<0.001	Yes
Col 4 vs. Col 2	0.754	6	2.975	0.331	No
Col 4 vs. Col 1	0.467	6	1.843	0.78	Do Not Test
Col 4 vs. Col 5	0.119	6	0.533	0.999	Do Not Test
Col 5 vs. Col 2	0.635	6	2.622	0.46	Do Not Test
Col 5 vs. Col 1	0.348	6	1.438	0.906	Do Not Test
Col 1 vs. Col 2	0.287	6	1.059	0.973	Do Not Test
A result of "Do Not Test" occurs for a comparison when no significant difference is found between two means that enclose that comparison. For example, if you had four means sorted in order, and found no difference between means 4 vs. 2, then you would not test 4 vs. 3 and 3 vs. 2, but still test 4 vs. 1 and 3 vs. 1 (4 vs. 3 and 3 vs. 2 are enclosed by 4 vs. 2: 4 3 2 1). Note that not testing the …
