# Supplementary material for: 3,6’-dithiopomalidomide reduces neural loss, inflammation, behavioral deficits in brain injury and microglial activation
Source: eLife. 2020 Jun 26;9:e54726. doi: 10.7554/eLife.54726 (PMC7375814; doi:10.7554/eLife.54726)
Supplement: Figure 11—source data 2. [file elife-54726-fig11-data2.xlsx]

## Sheet: 1211
COX2	COX2	COX2
NO.	Name	Ct	actin CT	delta CT	(-ΔΔCt)	2^(-ΔΔCt)				COX2	sham	sham+0.5DP	T+VE	T+Pom	T+0.5DP	T+0.1DP
137	sh	21.83	15.73	6.1	-0.08	0.946058	6.02	-0.08	0.946058		0.946058	0.283221	1.64718	0.726986	3.605	1.81504
138	sh	22.42	17.3	5.12	0.9	1.86607		0.9	1.86607		1.86607	0.554785	3.41054	1.56917	1.90528	2.15846
139	sh	22.82	17.44	5.38	0.64	1.55833		0.64	1.55833		1.55833	0.97942	1.97247	1.91853	1.08673	1.10957
140	sh	22.44	15.87	6.57	-0.55	0.68302		-0.55	0.68302		0.68302	0.63728	1.71713	4.37717	2.26577	2.73208
151	sh	23.08	16.15	6.93	-0.91	0.532185		-0.91	0.532185		0.532185	0.381565	2.82843	5.77572	0.615572	0.397768
146	shDP	23.19	15.35	7.84	-1.82	0.283221		-1.82	0.283221				2.17347		0.655197	1.03526
147	shDP	22.35	15.48	6.87	-0.85	0.554785		-0.85	0.554785				9.64646		1.04247
148	shDP	21.95	15.9	6.05	-0.03	0.97942		-0.03	0.97942
149	shDP	22.99	16.32	6.67	-0.65	0.63728		-0.65	0.63728
150	shDP	22.53	15.12	7.41	-1.39	0.381565		-1.39	0.381565
7	TBI+VEH	22.54	17.24	5.3	0.72	1.64718		0.72	1.64718
12	TBI+VEH	21.14	16.89	4.25	1.77	3.41054		1.77	3.41054
19	TBI+VEH	22.11	17.07	5.04	0.98	1.97247		0.98	1.97247
131	TBI+VEH	20.03	14.79	5.24	0.78	1.71713		0.78	1.71713
132	TBI+VEH	20.21	15.69	4.52	1.5	2.82843		1.5	2.82843	COX2	sham	sham+0.5DP	T+VE	T+Pom	T+0.5DP	T+0.1DP
134	TBI+VEH	20.63	15.73	4.9	1.12	2.17347		1.12	2.17347		0.946058	0.283221	1.64718			1.81504
135	TBI+VEH	18.06	15.31	2.75	3.27	9.64646		3.27	9.64646			0.554785	3.41054	1.56917		2.15846
21	T+Pom	24.59	18.11	6.48	-0.46	0.726986		-0.46	0.726986			0.97942	1.97247	1.91853	1.08673	1.10957
110	T+Pom	21.28	15.91	5.37	0.65	1.56917		0.65	1.56917		0.68302	0.63728	1.71713	4.37717		2.73208
77	T+Pom	20.43	15.35	5.08	0.94	1.91853		0.94	1.91853		0.532185	0.381565	2.82843	5.77572	0.615572
78	T+Pom	18.97	15.08	3.89	2.13	4.37717		2.13	4.37717				2.17347		0.655197	1.03526
79	T+Pom	18.79	15.3	3.49	2.53	5.77572		2.53	5.77572						1.04247
141	T+DP0.5	19.64	15.47	4.17	1.85	3.605		1.85	3.605
142	T+DP0.5	20.14	15.05	5.09	0.93	1.90528		0.93	1.90528				3.10803	1.11419	2.16745
143	T+DP0.5	22.61	16.71	5.9	0.12	1.08673		0.12	1.08673				4.12959	2.33918	0.880259
144	T+DP0.5	20.12	15.28	4.84	1.18	2.26577		1.18	2.26577				3.24001	1.65405	1.21926
145	T+DP0.5	21.66	14.94	6.72	-0.7	0.615572		-0.7	0.615572				2.8206
191	T+DP0.5	21.68	15.05	6.63	-0.61	0.655197		-0.61	0.655197
192	T+DP0.5	20.81	14.85	5.96	0.06	1.04247		0.06	1.04247
183	T+DP0.1	20.82	15.66	5.16	0.86	1.81504		0.86	1.81504
184	T+DP0.1	20.86	15.95	4.91	1.11	2.15846		1.11	2.15846
185	T+DP0.1	20.38	14.51	5.87	0.15	1.10957		0.15	1.10957
186	T+DP0.1	19.77	15.2	4.57	1.45	2.73208		1.45	2.73208
187	T+DP0.1	22.7	15.35	7.35	-1.33	0.397768		-1.33	0.397768
188	T+DP0.1	22.22	16.25	5.97	0.05	1.03526		0.05	1.03526

## Sheet: COX2
								COX2	sham	sham+0.5DP	T+VE	T+Pom	T+0.5DP	T+0.1DP
One Way Analysis of Variance	星期二, 十二月 11, 2018, 下午 04:23:26								0.9461	0.5548	3.4105	1.5692	1.0867	1.815
									0.683	0.9794	2.8284	1.9185	0.6156	2.1585
Data source: Data 1 in Notebook1									0.5322	0.6373	2.1735	1.1142	0.6552	1.1096
									0.4401	0.3816	3.108	2.3392	1.0425	1.0353
Normality Test:	Passed	(P = 0.282)							0.6906		4.1296	1.654	0.8803
											3.24
Equal Variance Test:	Passed	(P = 0.171)									2.8206
									Col 1	Col 2	Col 3	Col 4	Col 5	Col 6
Group Name	N	Missing	Mean	Std Dev	SEM		Mean	SEM
Col 1	5	0	0.658	0.192	0.086		1	0.130699
Col 2	4	0	0.638	0.251	0.126		0.969605	0.191489
Col 3	7	0	3.102	0.604	0.228	TBI+Veh V.S. Sham	4.71429	0.346505		TBI+Veh V.S. Sham	3.71429
Col 4	5	0	1.719	0.452	0.202		2.61246	0.306991		TBI+Pom(0.5) V.S. Sham	1.61246	56.5876	TBI+Pom(0.5) V.S. TBI+Veh
Col 5	5	0	0.856	0.216	0.0966		1.30091	0.146809		TBI+DP(0.5) V.S. Sham	0.300912	91.8985	TBI+DP(0.5) V.S. TBI+Veh
Col 6	4	0	1.53	0.547	0.274		2.32523	0.416413		TBI+DP(0.1) V.S. Sham	1.32523	64.3208	TBI+DP(0.1) V.S. TBI+Veh
Source of Variation	DF	SS	MS	F	P
Between Groups	5	26.703	5.341	28.966	<0.001
Residual	24	4.425	0.184
Total	29	31.128
The differences in the mean values among the treatment groups are greater than would be expected by chance; there is a statistically significant difference (P = <0.001).
Power of performed test with alpha = 0.050: 1.000
All Pairwise Multiple Comparison Procedures (Tukey Test):
Comparisons for factor:
Comparison	Diff of Means	p	q	P	P<0.050
Col 3 vs. Col 2	2.463	6	12.944	<0.001	Yes
Col 3 vs. Col 1	2.443	6	13.742	<0.001	Yes
Col 3 vs. Col 5	2.245	6	12.63	<0.001	Yes
Col 3 vs. Col 6	1.572	6	8.26	<0.001	Yes
Col 3 vs. Col 4	1.383	6	7.776	<0.001	Yes
Col 4 vs. Col 2	1.081	6	5.306	0.011	Yes
Col 4 vs. Col 1	1.061	6	5.523	0.008	Yes
Col 4 vs. Col 5	0.863	6	4.494	0.042	Yes
Col 4 vs. Col 6	0.189	6	0.93	0.985	No
Col 6 vs. Col 2	0.891	6	4.152	0.07	No
Col 6 vs. Col 1	0.871	6	4.277	0.058	Do Not Test
Col 6 vs. Col 5	0.674	6	3.307	0.218	Do Not Test
Col 5 vs. Col 2	0.218	6	1.069	0.972	Do Not Test
Col 5 vs. Col 1	0.198	6	1.029	0.977	Do Not Test
Col 1 vs. Col 2	0.0201	6	0.0989	1	Do Not Test
A result of "Do Not Test" occurs for a comparison when no significant difference is found between two means that enclose that comparison. For example, if you had four means sorted in order, and found no difference between means 4 vs. 2, then you would not test 4 vs. 3 and 3 vs. 2, but still test 4 vs. 1 and 3 vs. 1 (4 vs. 3 and 3 vs. 2 are enclosed by 4 vs. 2: 4 3 2 1). Note that not testing the …

## Sheet: Figure 11 (xi)-COX2 (mRNA)
								COX2	sham	sham+0.5DP	T+VE	T+Pom	T+0.5DP	T+0.1DP
One Way Analysis of Variance	星期二, 十二月 11, 2018, 下午 04:23:26								0.9461	0.5548	3.4105	1.5692	1.0867	1.815
									0.683	0.9794	2.8284	1.9185	0.6156	2.1585
Data source: Data 1 in Notebook1									0.5322	0.6373	2.1735	1.1142	0.6552	1.1096
									0.4401	0.3816	3.108	2.3392	1.0425	1.0353
Normality Test:	Passed	(P = 0.282)							0.6906		4.1296	1.654	0.8803
											3.24
Equal Variance Test:	Passed	(P = 0.171)									2.8206
									Col 1	Col 2	Col 3	Col 4	Col 5	Col 6
Group Name	N	Missing	Mean	Std Dev	SEM		Mean	SEM
Col 1	5	0	0.658	0.192	0.086		1	0.130699
Col 2	4	0	0.638	0.251	0.126		0.969605	0.191489
Col 3	7	0	3.102	0.604	0.228	TBI+Veh V.S. Sham	4.71429	0.346505		TBI+Veh V.S. Sham	3.71429
Col 4	5	0	1.719	0.452	0.202		2.61246	0.306991		TBI+Pom(0.5) V.S. Sham	1.61246	56.5876	TBI+Pom(0.5) V.S. TBI+Veh
Col 5	5	0	0.856	0.216	0.0966		1.30091	0.146809		TBI+DP(0.5) V.S. Sham	0.300912	91.8985	TBI+DP(0.5) V.S. TBI+Veh
Col 6	4	0	1.53	0.547	0.274		2.32523	0.416413		TBI+DP(0.1) V.S. Sham	1.32523	64.3208	TBI+DP(0.1) V.S. TBI+Veh
Source of Variation	DF	SS	MS	F	P
Between Groups	5	26.703	5.341	28.966	<0.001
Residual	24	4.425	0.184
Total	29	31.128
The differences in the mean values among the treatment groups are greater than would be expected by chance; there is a statistically significant difference (P = <0.001).
Power of performed test with alpha = 0.050: 1.000
All Pairwise Multiple Comparison Procedures (Tukey Test):
Comparisons for factor:
Comparison	Diff of Means	p	q	P	P<0.050
Col 3 vs. Col 2	2.463	6	12.944	<0.001	Yes
Col 3 vs. Col 1	2.443	6	13.742	<0.001	Yes
Col 3 vs. Col 5	2.245	6	12.63	<0.001	Yes
Col 3 vs. Col 6	1.572	6	8.26	<0.001	Yes
Col 3 vs. Col 4	1.383	6	7.776	<0.001	Yes
Col 4 vs. Col 2	1.081	6	5.306	0.011	Yes
Col 4 vs. Col 1	1.061	6	5.523	0.008	Yes
Col 4 vs. Col 5	0.863	6	4.494	0.042	Yes
Col 4 vs. Col 6	0.189	6	0.93	0.985	No
Col 6 vs. Col 2	0.891	6	4.152	0.07	No
Col 6 vs. Col 1	0.871	6	4.277	0.058	Do Not Test
Col 6 vs. Col 5	0.674	6	3.307	0.218	Do Not Test
Col 5 vs. Col 2	0.218	6	1.069	0.972	Do Not Test
Col 5 vs. Col 1	0.198	6	1.029	0.977	Do Not Test
Col 1 vs. Col 2	0.0201	6	0.0989	1	Do Not Test
A result of "Do Not Test" occurs for a comparison when no significant difference is found between two means that enclose that comparison. For example, if you had four means sorted in order, and found no difference between means 4 vs. 2, then you would not test 4 vs. 3 and 3 vs. 2, but still test 4 vs. 1 and 3 vs. 1 (4 vs. 3 and 3 vs. 2 are enclosed by 4 vs. 2: 4 3 2 1). Note that not testing the …
