# Supplementary material for: 3,6’-dithiopomalidomide reduces neural loss, inflammation, behavioral deficits in brain injury and microglial activation
Source: eLife. 2020 Jun 26;9:e54726. doi: 10.7554/eLife.54726 (PMC7375814; doi:10.7554/eLife.54726)
Supplement: Figure 11—source data 3. [file elife-54726-fig11-data3.xlsx]

## Sheet: COX2-NeuN
sh	COX2	NeuN	COX2/NeuN		sh+DP0.5	COX2	NeuN	COX2/NeuN		T24	COX2	NeuN	COX2/NeuN		T+Pom0.5	COX2	NeuN	COX2/NeuN		T+DP0.5	COX2	NeuN	COX2/NeuN		T+DP0.1	COX2	NeuN	COX2/NeuN
151-1	6	79	0.0759494	0.0775253	168-1	6	104	0.0576923	0.0729826	171-1-1	11	52	0.211538	0.266826	177-1	7	41	0.170732	0.170732	192-1	8	86	0.0930233	0.131193	183-1	4	38	0.105263	0.157663
151-2	7	83	0.0843373		168-2	6	77	0.0779221		171-2	33	120	0.275		178-1	11	89	0.123596	0.138299	192-2	6	50	0.12		183-2	10	42	0.238095
151-3	6	83	0.0722892		168-3	4	48	0.0833333		171-3	19	54	0.351852		178-2	13	93	0.139785		192-3	13	72	0.180556		183-3	7	54	0.12963
137-1	6	104	0.0576923	0.0597539	147-1	4	58	0.0689655	0.0657328	171-4	19	83	0.228916		178-3	15	99	0.151515		143-1	13	132	0.0984848	0.112968	184-1	8	113	0.0707965	0.118877
137-2	7	116	0.0603448		147-2	6	96	0.0625		172-1	8	29	0.275862	0.295797	179-1	17	90	0.188889	0.178938	143-2	10	70	0.142857		184-2	13	75	0.173333
137-3	6	98	0.0612245		167-1	6	104	0.0576923	0.0791371	172-2	9	32	0.28125		179-2	21	124	0.169355		143-3	4	41	0.097561		184-3	9	80	0.1125
152-1	5	110	0.0454545	0.0428947	167-2	8	83	0.0963855		172-3	9	29	0.310345		179-3	20	112	0.178571		193-1	6	98	0.0612245	0.0984517	187-1	7	54	0.12963	0.132896
152-2	2	87	0.0229885		167-3	7	84	0.0833333		135-1	44	134	0.328358	0.418468						193-2	6	67	0.0895522		187-2	7	46	0.152174
152-3	5	83	0.060241							135-2	30	86	0.348837							193-3	12	83	0.144578		187-3	9	77	0.116883
										135-3	47	90	0.522222
										135-4	65	137	0.474453
										173-1	21	52	0.403846	0.354053
										173-2	34	81	0.419753
										173-1	7	25	0.28
										173-2	26	78	0.333333
										173-3	17	51	0.333333
		sham	sham+DP(0.5)	TBI+Veh	TBI+Pom(0.5)	TBI+DP(0.5)	TBI+DP(0.1)
		0.0775253	0.0729826	0.266826	0.170732	0.131193	0.157663
		0.0597539	0.0657328	0.295797	0.138299	0.112968	0.10571
		0.0428947	0.0791371	0.418468	0.178938	0.0984517	0.132896
				0.354053
		Group Name	N	Missing	Mean	Std Dev	SEM
		sham	3	0	0.0601	0.0173	0.01
		sham+DP(0.5)	3	0	0.0726	0.00671	0.00387
		TBI+Veh	4	0	0.334	0.0671	0.0336
		TBI+Pom(0.5)	3	0	0.163	0.0215	0.0124
		TBI+DP(0.5)	3	0	0.114	0.0164	0.00947
		TBI+DP(0.1)	3	0	0.132	0.026	0.015
		TBI+Veh V.S. Sham	4.5574
		TBI+Pom(0.5) V.S. Sham	1.71215	62.4315	TBI+Pom(0.5) V.S. TBI+Veh
		TBI+DP(0.5) V.S. Sham	0.896839	80.3213	TBI+DP(0.5) V.S. TBI+Veh
		TBI+DP(0.1) V.S. Sham	1.19634	73.7495	TBI+DP(0.1) V.S. TBI+Veh

## Sheet: Figure 11 (xi)-NeuN, COX-2
NeuN/COX-2
sham	sham+DP(0.5)	TBI+Veh	TBI+Pom(0.5)	TBI+DP(0.5)	TBI+DP(0.1)
0.0775253	0.0729826	0.266826	0.170732	0.131193	0.157663
0.0597539	0.0657328	0.295797	0.138299	0.112968	0.10571
0.0428947	0.0791371	0.418468	0.178938	0.0984517	0.132896
		0.354053
Group Name	N	Missing	Mean	Std Dev	SEM
sham	3	0	0.0601	0.0173	0.01
sham+DP(0.5)	3	0	0.0726	0.00671	0.00387
TBI+Veh	4	0	0.334	0.0671	0.0336
TBI+Pom(0.5)	3	0	0.163	0.0215	0.0124
TBI+DP(0.5)	3	0	0.114	0.0164	0.00947
TBI+DP(0.1)	3	0	0.132	0.026	0.015
TBI+Veh V.S. Sham	4.5574
TBI+Pom(0.5) V.S. Sham	1.71215	62.4315	TBI+Pom(0.5) V.S. TBI+Veh
TBI+DP(0.5) V.S. Sham	0.896839	80.3213	TBI+DP(0.5) V.S. TBI+Veh
TBI+DP(0.1) V.S. Sham	1.19634	73.7495	TBI+DP(0.1) V.S. TBI+Veh
