# Supplementary material for: 3,6’-dithiopomalidomide reduces neural loss, inflammation, behavioral deficits in brain injury and microglial activation
Source: eLife. 2020 Jun 26;9:e54726. doi: 10.7554/eLife.54726 (PMC7375814; doi:10.7554/eLife.54726)
Supplement: Figure 12—source data 1. [file elife-54726-fig12-data1.xlsx]

## Sheet: Fig 12 A-F
	Figure 12 A			Figure 12 A			Figure 12 B			Figure 12 B
	POM dose curve			POM dose curve			3,6'-dt-POM dose curve			3,6'-dt-POM dose curve
	Cell Viability	% CH		NITRITE	% CH		Cell Viability	% CH		NITRITE	% CH
	DMSO-1	100.822		DMSO-1	85.8311		DMSO-1	91.7623		DMSO-1	87.8086
	DMSO-2	102.538		DMSO-2	93.0712		DMSO-2	100.473		DMSO-2	115.239
	DMSO-3	96.6393		DMSO-3	121.098		DMSO-3	107.765		DMSO-3	96.9521
	10 uM -1	97.4973		10 uM -1	81.3935		10 uM -1	85.8879		10 uM -1	35.9951
	10 uM -2	102.002		10 uM -2	86.0646		10 uM -2	92.1675		10 uM -2	45.1387
	10 uM -3	96.8538		10 uM -3	83.7291		10 uM -3	102.903		10 uM -3	48.1865
	10 uM -4	99.3207		10 uM -4	83.7291		10 uM -4	110.398		10 uM -4	45.1387
	20 uM -1	96.3175		20 uM -1	76.7225		20 uM -1	75.5571		20 uM -1	17.708
	20 uM -2	96.961		20 uM -2	76.7225		20 uM -2	94.1931		20 uM -2	23.8037
	20 uM -3	103.182		20 uM -3	88.4002		20 uM -3	93.5854		20 uM -3	32.9473
	20 uM -4	107.043		20 uM -4	97.7423		20 uM -4	103.511		20 uM -4	42.0908
	30 uM -1	89.024		30 uM -1	86.0646		30 uM -1	73.1263		30 uM -1	15.2697
	30 uM -2	107.151		30 uM -2	88.4002		30 uM -2	88.5213		30 uM -2	13.1362
	30 uM -3	101.573		30 uM -3	102.413		30 uM -3	96.8265		30 uM -3	39.043
	30 uM -4	100.179		30 uM -4	97.7423		30 uM -4	93.3828		30 uM -4	51.5392
	60 uM -1	108.867		60 uM -1	76.7225		60 uM -1	82.4443		60 uM -1	15.5745
	60 uM -2	114.444		60 uM -2	86.0646		60 uM -2	98.8521		60 uM -2	17.708
	60 uM -3	123.454		60 uM -3	90.7357		60 uM -3	111.411		60 uM -3	17.708
	60 uM -4	114.337		60 uM -4	93.0712		60 uM -4	112.019		60 uM -4	32.9473
	100 uM -1	114.766		100 uM -1	79.058		100 uM -1	92.7752		100 uM -1	20.7559
	100 uM -2	118.413		100 uM -2	76.7225		100 uM -2	91.5598		100 uM -2	23.8037
	100 uM -3	123.239		100 uM -3	76.7225		100 uM -3	109.791		100 uM -3	26.8516
	100 uM -4	125.813		100 uM -4	65.0448		100 uM -4	116.678		100 uM -4	35.9951
	Figure 12 C
	Time (hr)	DMSO				Pom 30				Pom 60				Pom 100
	0	99.2	98.3	102.5		90	100.6	111.3		107.7	107.4	82.3		104.6	95.8	99.6
	60	121.1	103.5	99.9		101.6	115.3	96.6		114.3	112.3	92.4		132.4	104.2	102.5
	120	134.2	126.7	120.1		113.8	134.4	117.2		137.4	136.1	111		136.1	126.1	131.9
	180	170.4	150.2	148.2		146.9	168.8	141.9		164.2	161.6	148.2		188.2	154.6	155.9
	240	204.4	189.4	185.1		184.1	202.5	174.7		207.3	200.5	184.5		228.2	205.9	208
						dt-Pom 30				dt-Pom 60				dt-Pom 100
						91.7	95	114		108.1	91.7	100.3		111.7	91.6	96.6
						42	46.3	55.7		45	41.1	43.1		46.2	48.9	47
						47	53.7	65.7		54.4	44.3	48.2		43.1	38.5	43.1
						66.3	74.7	60		86.2	54.8	54.8		54.3	53.5	57
						96.3	102.7	126		132.4	114.8	110.5		106.7	107.8	112.4
	Figure 12 D
	Time (hr)	DMSO				dt-Pom 30					dt-Pom 60				dt-Pom 100
	0	106.4	91.5	102		103.4	101.5	95.2		107.2	91.6	101.1			97.4	97.4	105.2
	60	114.3	108.2	111.7		97	101.5	103.4		103.7	95.9	95.1			97.4	97.4	105.2
	120	126.6	123.1	132.8		101.5	107.9	108.8		106.3	96.8	100.3			99.1	99.1	108.6
	180	131	133.7	143.4		116	104.3	115.1		100.3	99.4	103.7			110.3	96.6	110.3
	240	162.7	143.4	160.9		126.9	124.2	126.9		117.5	102.9	108.9			117.2	111.2	121.6
	Figure 12 E			Figure 12 E			Figure 12 F			Figure 12 F
	RATIO iNOS/GAPDH			RATIO iNOS/GAPDH			RATIO COX2/GAPDH			RATIO COX2/GAPDH
	iNOS - POM	% change ratio		iNOS - dt-POM	% change ratio		COX2 - POM	% change ratio		COX2 - dt-POM	% change ratio
	DMSO 1	72.8794		DMSO 1	105.571		DMSO 1	118.68		DMSO 1	129.097
	DMSO 2	183.582		DMSO 2	109.454		DMSO 2	150.36		DMSO 2	118.179
	DMSO 3	43.5388		DMSO 3	84.9756		DMSO 3	30.9602		DMSO 3	52.7248
	POM 10 uM 1	122.71		3,6-dt-POM 10 uM 1	18.8019		POM 10 uM 1	243.753		3,6-dt-POM 10 uM 1	10.7549
	POM 10 uM 2	137.725		3,6-dt-POM 10 uM 2	26.912		POM 10 uM 2	222.475		3,6-dt-POM 10 uM 2	20.6805
	POM 10 uM 3	156.037		3,6-dt-POM 10 uM 3	46.1208		POM 10 uM 3	227.342		3,6-dt-POM 10 uM 3	9.86005
	POM 10 uM 4	216.181		3,6-dt-POM 10 uM 4	18.9786		POM 10 uM 4	493.578		3,6-dt-POM 10 uM 4	3.47504
	POM 30 uM 1	206.707		3,6-dt-POM 30 uM 1	1.88547		POM 30 uM 1	457.742		3,6-dt-POM 30 uM 1	-0.424657
	POM 30 uM 2	157.96		3,6-dt-POM 30 uM 2	4.24994		POM 30 uM 2	269.089		3,6-dt-POM 30 uM 2	0.190545
	POM 30 uM 3	107.162		3,6-dt-POM 30 uM 3	3.01839		POM 30 uM 3	151.129		3,6-dt-POM 30 uM 3	-0.076318
	POM 30 uM 4	116.856		3,6-dt-POM 30 uM 4	-0.699937		POM 30 uM 4	151.842		3,6-dt-POM 30 uM 4	-0.632553
