# Supplementary material for: 3,6’-dithiopomalidomide reduces neural loss, inflammation, behavioral deficits in brain injury and microglial activation
Source: eLife journal article supplement (doi:10.7554/elife.54726), 2020-06-26

Sham + DP (0.5 mg/kg) -5hr

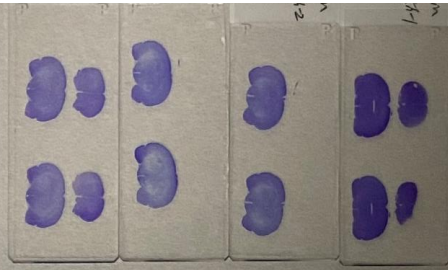

Sham

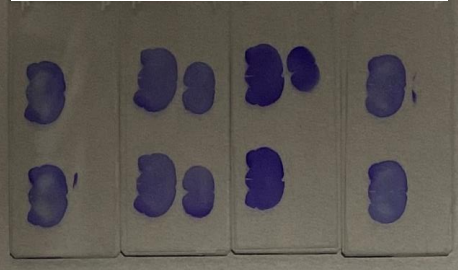

TBI + Veh

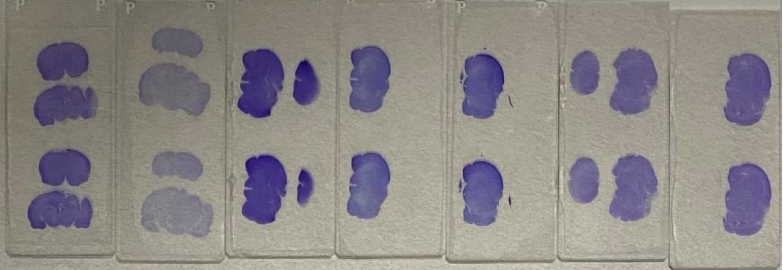

TBI + Pom (0.1 mg/kg) -5hr

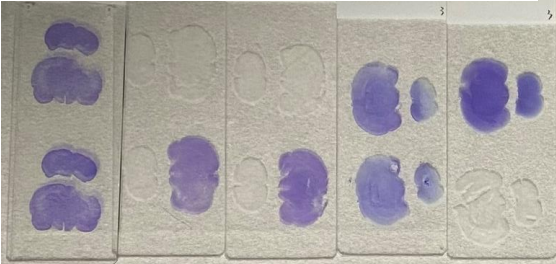

TBI + Pom (0.5 mg/kg) -5hr

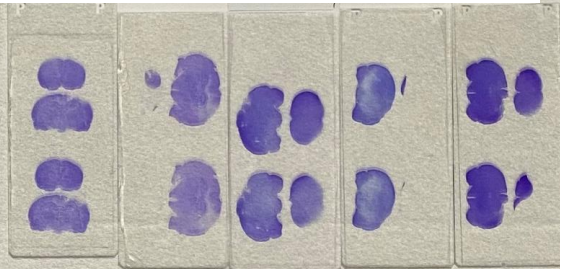

TBI + DP (0.5 mg/kg) -5hr

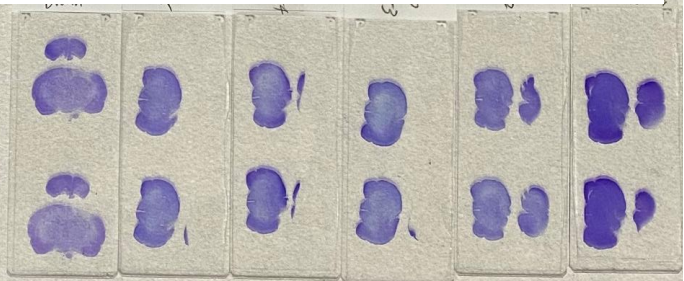

TBI + DP (0.5 mg/kg) -7hr

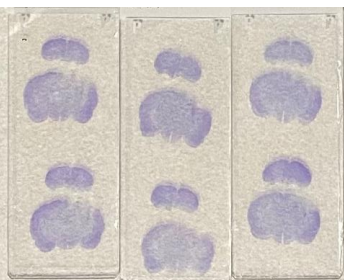

TBI + DP (0.1 mg/kg) -5hr

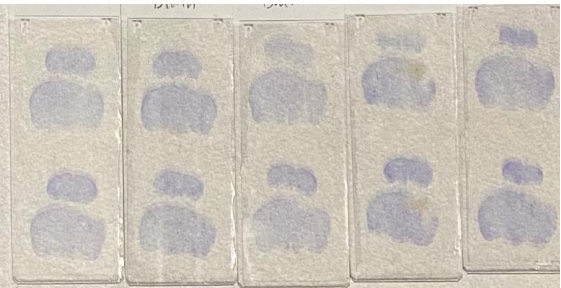

Supplement: supp [file elife-54726-supp-v1.zip]
